# Supplementary material for: Design and construction of high skew Super-T bridges
Source: MDPI journal article supplement (doi:10.3390/pharmaceutics16030358), 2011-10-01
Supplement: s1 [file s1]

## **Modeling Pharmacokinetics in Individual Patients Using Therapeutic Drug Monitoring and Artificial Population Quasi-Models: A Study with Piperacillin**

Gellért Balázs Karvaly, István Vincze, Michael Noel Neely, István Zátroch, Zsuzsanna Nagy, Ibolya Kocsis and Csaba Kopitkó

### **1. Source code for modeling using Pmetrics:**

```
Library(Pmetrics)

# Run 1 - 1-compt, no covariate
pipdata <- PM_data$new(data = "data.csv")
pipmodel.onecompt.1 <- PM_model$new("model.txt")
pip.onecompt.1 <- PM_fit$new(model = pipmodel.onecompt.1, data =
pipdata)
pip.onecompt.1$run(cycles=5000)

# Run 2 - 2-compt, no covariate
pipmodel.twocompt.1 <- PM_model$new("model.txt")
pip.twocompt.1 <- PM_fit$new(model = pipmodel.twocompt.1, data =
pipdata)
pip.twocompt.1$run(cycles=5000)

# Run 3 - 1-compt, covariate: CRCL
pipmodel.onecompt.cov.1 <- PM_model$new("model.txt")
pip.onecompt.cov.1 <- PM_fit$new(model = pipmodel.onecompt.cov.1,
data = pipdata)
pip.onecompt.cov.1$run(cycles=5000)

# Run 4 - 2-compt, covariate: CRCL
pipmodel.twocompt.cov.1 <- PM_model$new("model.txt")
pip.twocompt.cov.1 <- PM_fit$new(model = pipmodel.twocompt.cov.1,
data = pipdata)
pip.twocompt.cov.1$run(cycles=5000)
```

```

# Evaluation of models

pip.subj=NULL

pip.1ct.data = PM_load(1)

pip.1ct.sum=pip.1ct.data$op$summary(pred.type =
"post",icen="median")

pip.1ct.post = pip.1ct.data$final$data$postMed # posteriors

pip.1ct.supp = pip.1ct.data$final$popPoints # support points

pip.1ct.stat=subset(pip.1ct.data$op$data,pip.1ct.data$op$data$pred.t
ype=="post"&pip.1ct.data$op$data$icen=="mean")

pip.1ct.stat.list=split(pip.1ct.stat,pip.1ct.stat$id) # list by
subject initials


pip.1ct.mse=NULL

pip.1ct.regr=data.frame(NA,NA,NA)


for (s in 1:length(pip.1ct.stat.list)) {
  pip.1ct.mse[[s]]=mean(pip.1ct.stat.list[[s]]$ds)
  pip.subj[[s]]=pip.1ct.stat.list[[s]][1,1]
  pip.1ct.regr[[s,1]]=lm(pip.1ct.stat.list[[s]]$pred~pip.1ct.stat
.list[[s]]$obs)$coefficients[[2]]
  pip.1ct.regr[[s,2]]=lm(pip.1ct.stat.list[[s]]$pred~pip.1ct.stat
.list[[s]]$obs)$coefficients[[1]]
  pip.1ct.regr[[s,3]]=cor(x=pip.1ct.stat.list[[s]]$pred,
y=pip.1ct.stat.list[[s]]$obs, method="pearson")
}


pip.1ct.mse=unlist(pip.1ct.mse)
pip.subj=unlist(pip.subj)
pip.1ct.mse.wr=data.frame(pip.subj,pip.1ct.mse)
pip.1ct.regr=cbind(pip.subj, pip.1ct.regr)
colnames(pip.1ct.regr)=c("subject","slope","intercept","pearson r")


pip.2ct.data = PM_load(4)

```

```

pip.2ct.sum=pip.2ct.data$op$summary(pred.type =
"post",icen="median")

pip.2ct.post = pip.2ct.data$final$data$postMed # posteriors
pip.2ct.supp = pip.2ct.data$final$popPoints # support points
pip.2ct.stat=subset(pip.2ct.data$op$data,pip.2ct.data$op$data$pred.t
ype=="post"&pip.2ct.data$op$data$icen=="mean")

pip.2ct.stat.list=split(pip.2ct.stat,pip.2ct.stat$id) # list by
subject initials

pip.2ct.mse=NULL

pip.2ct.regr=data.frame(NA,NA,NA)

for (s in 1:length(pip.2ct.stat.list)) {
  pip.2ct.mse[[s]]=mean(pip.2ct.stat.list[[s]]$ds)
  pip.subj[[s]]=pip.2ct.stat.list[[s]][1,1]

  pip.2ct.regr[[s,1]]=lm(pip.2ct.stat.list[[s]]$pred~pip.2ct.stat
.list[[s]]$obs)$coefficients[[2]]

  pip.2ct.regr[[s,2]]=lm(pip.2ct.stat.list[[s]]$pred~pip.2ct.stat
.list[[s]]$obs)$coefficients[[1]]

  pip.2ct.regr[[s,3]]=cor(x=pip.2ct.stat.list[[s]]$pred,
y=pip.2ct.stat.list[[s]]$obs, method="pearson")
}

pip.2ct.mse=unlist(pip.2ct.mse)
pip.subj=unlist(pip.subj)
pip.2ct.mse.wr=data.frame(pip.subj,pip.2ct.mse)
pip.2ct.regr=cbind(pip.subj, pip.2ct.regr)
colnames(pip.2ct.regr)=c("subject","slope","intercept","pearson r")

pip.1ct.crcl.data = PM_load(3)
pip.1ct.crcl.sum=pip.1ct.crcl.data$op$summary(pred.type =
"post",icen="median")

```

```

pip.1ct.crcl.post = pip.1ct.crcl.data$final$data$postMed #
posteriors

pip.1ct.crcl.supp = pip.1ct.crcl.data$final$popPoints # support
points

pip.1ct.crcl.stat=subset(pip.1ct.crcl.data$op$data,pip.1ct.crcl.data
$op$data$pred.type=="post"&pip.1ct.crcl.data$op$data$icen=="mean")

pip.1ct.crcl.stat.list=split(pip.1ct.crcl.stat,pip.1ct.crcl.stat$id)
# list by subject initials

pip.1ct.crcl.mse=NULL

pip.1ct.crcl.regr=data.frame(NA,NA,NA)

for (s in 1:length(pip.1ct.crcl.stat.list)) {
  pip.1ct.crcl.mse[[s]]=mean(pip.1ct.crcl.stat.list[[s]]$ds)
  pip.subj[[s]]=pip.1ct.crcl.stat.list[[s]][1,1]
  pip.1ct.crcl.regr[[s,1]]=lm(pip.1ct.crcl.stat.list[[s]]$pred~pi
p.1ct.crcl.stat.list[[s]]$obs)$coefficients[[2]]
  pip.1ct.crcl.regr[[s,2]]=lm(pip.1ct.crcl.stat.list[[s]]$pred~pi
p.1ct.crcl.stat.list[[s]]$obs)$coefficients[[1]]

  pip.1ct.crcl.regr[[s,3]]=cor(x=pip.1ct.crcl.stat.list[[s]]$pred
, y=pip.1ct.crcl.stat.list[[s]]$obs, method="pearson")
}

pip.1ct.crcl.mse=unlist(pip.1ct.crcl.mse)
pip.subj=unlist(pip.subj)
pip.1ct.crcl.mse.wr=data.frame(pip.subj,pip.1ct.crcl.mse)
pip.1ct.crcl.regr=cbind(pip.subj, pip.1ct.crcl.regr)
colnames(pip.1ct.crcl.regr)=c("subject","slope","intercept","pearson
r")

pip.2ct.crcl.data = PM_load(4)

pip.2ct.crcl.sum=pip.2ct.crcl.data$op$summary(pred.type =
"post",icen="median")

pip.2ct.crcl.post = pip.2ct.crcl.data$final$data$postMed #
posteriors

pip.2ct.crcl.supp = pip.2ct.crcl.data$final$popPoints # support
points

```

```

pip.2ct.crcl.stat=subset(pip.2ct.crcl.data$op$data,pip.2ct.crcl.data
$op$data$pred.type=="post"&pip.2ct.crcl.data$op$data$icen=="mean")

pip.2ct.crcl.stat.list=split(pip.2ct.crcl.stat,pip.2ct.crcl.stat$id)
# list by subject initials

pip.2ct.crcl.mse=NULL

pip.2ct.crcl.regr=data.frame(NA,NA,NA)

for (s in 1:length(pip.2ct.crcl.stat.list)) {
  pip.2ct.crcl.mse[[s]]=mean(pip.2ct.crcl.stat.list[[s]]$ds)
  pip.subj[[s]]=pip.2ct.crcl.stat.list[[s]][1,1]
  pip.2ct.crcl.regr[[s,1]]=lm(pip.2ct.crcl.stat.list[[s]]$pred~pi
p.2ct.crcl.stat.list[[s]]$obs)$coefficients[[2]]
  pip.2ct.crcl.regr[[s,2]]=lm(pip.2ct.crcl.stat.list[[s]]$pred~pi
p.2ct.crcl.stat.list[[s]]$obs)$coefficients[[1]]
  pip.2ct.crcl.regr[[s,3]]=cor(x=pip.2ct.crcl.stat.list[[s]]$pred,
y=pip.2ct.crcl.stat.list[[s]]$obs, method="pearson")
}

pip.2ct.crcl.mse=unlist(pip.2ct.crcl.mse)
pip.subj=unlist(pip.subj)
pip.2ct.crcl.mse.wr=data.frame(pip.subj,pip.2ct.crcl.mse)
pip.2ct.crcl.regr=cbind(pip.subj, pip.2ct.crcl.regr)
colnames(pip.2ct.crcl.regr)=c("subject","slope","intercept","pearson
r")

comps=PM_compare(pip.1ct.data,pip.2ct.data,pip.1ct.crcl.data,pip.2ct
.crcl.data, icen="median")

comp.2ct=PM_compare(pip.2ct.data,pip.2ct.crcl.data, icen="median")

write.csv(pip.1ct.post,file="onecompt-posts.csv")
write.csv(pip.2ct.post,file="twocompt-posts.csv")
write.csv(pip.1ct.crcl.post,file="onecompt-crcl-posts.csv")
write.csv(pip.2ct.crcl.post,file="twocompt-crcl-posts.csv")

write.csv(pip.1ct.suppl,file="onecompt-suppl.csv")

```

```

write.csv(pip.2ct.supp, file="twocompt-suppoints.csv")
write.csv(pip.1ct.crcl.supp, file="onecompt-crcl-suppoints.csv")
write.csv(pip.2ct.crcl.supp, file="twocompt-crcl-suppoints.csv")

write.csv(pip.1ct.mse.wr, file="onecompt-mse.csv")
write.csv(pip.2ct.mse.wr, file="twocompt-mse.csv")
write.csv(pip.1ct.crcl.mse.wr, file="onecompt-crcl-mse.csv")
write.csv(pip.2ct.crcl.mse.wr, file="twocompt-crcl-mse.csv")

```

## 2. Final model files used for nonparametric adaptive grid population pharmacokinetic modeling

- **One compartment, no covariate**

```

#pri
Ke, 0.100000, 0.750000
V, 10.000000, 100.000000

#out
Y(1)=X(1)/V

#err
L=0.100000
0.255000,0.049873,-0.000361,0.000001

```

- **Two compartments, no covariate**

```

#pri
Ke, 0.100000, 1.700000
KPC, 0.050000, 5.000000
KCP, 0.050000, 5.000000
V, 5.000000, 35.000000

#out
Y(1)=X(1)/V

#err
L=0.100000
0.255000,0.049873,-0.000361,0.000001

```

- **One compartment, creatinine clearance covariate**

```

#pri
K, 0.001000, 0.006000

```

```
Ki, 0.005000, 0.100000
V, 15.000000, 80.000000
```

```
#cov
CRCL
```

```
#sec
Ke=K*CRCL+Ki
```

```
#out
Y(1)=X(1)/V
```

```
#err
L=0.100000
0.255000,0.049873,-0.000361,0.000001
```

- **Two compartments, creatinine clearance covariate**

```
#pri
K, 0.000500, 0.025000
Ki, 0.000000, 0.350000
V, 5.000000, 25.000000
KCP, 0.200000, 6.000000
KPC, 0.200000, 6.000000
```

```
#cov
CRCL
```

```
#sec
Ke=K*CRCL+Ki
```

```
#out
Y(1)=X(1)/V
```

```
#err
L=0.100000
0.255000,0.049873,-0.000361,0.000001
```

### 3. Supplementary Figure

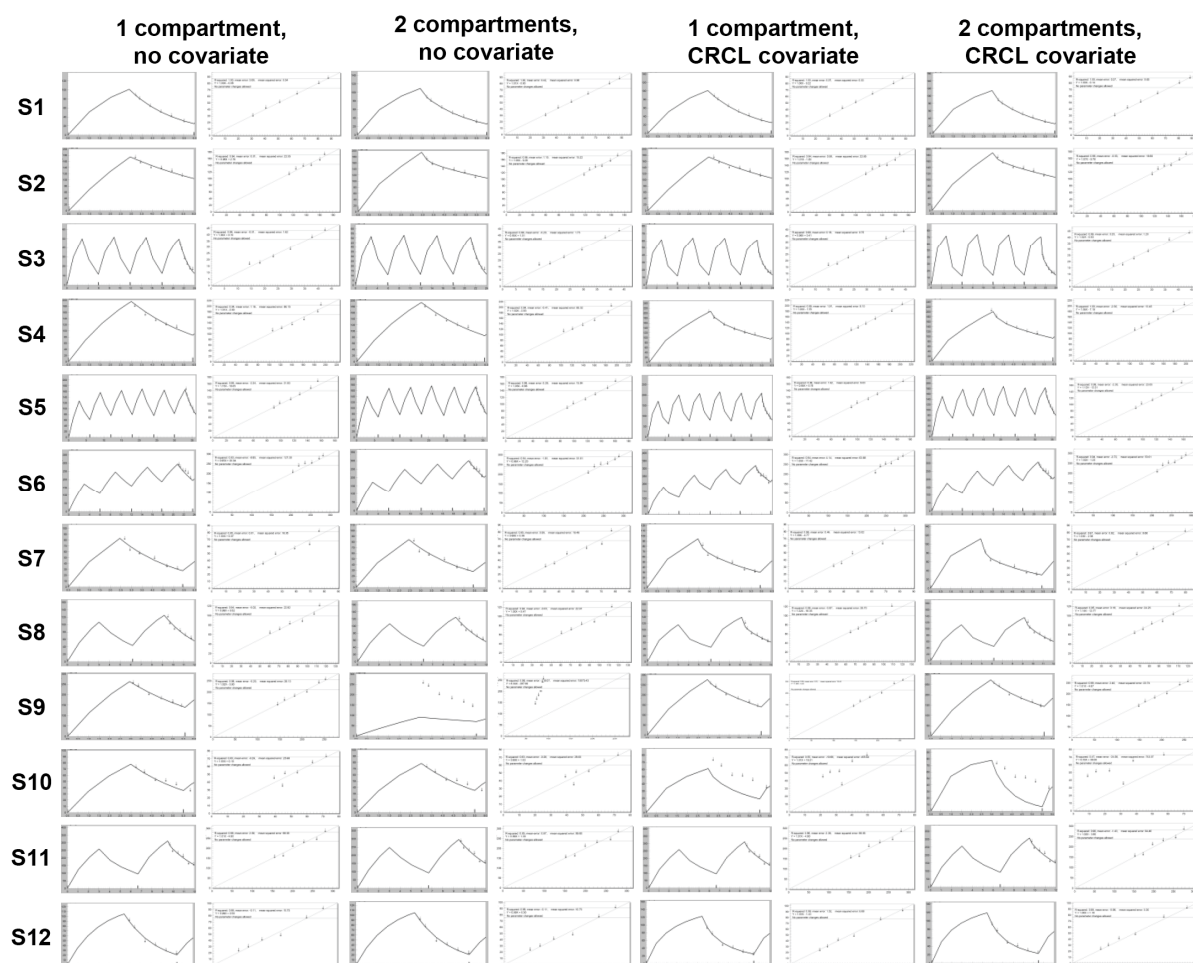

Supplementary Figure S1. Individual concentration-time curves obtained when applying the best-performing quasi-models to the observed piperacillin concentrations. Each row shows the curves fitted, along with the correlation plots of the observed and predicted concentrations for a Subject (S1-S12). The horizontal and vertical axes of the fitted curve plots represent time (h) and piperacillin concentration ( $\mu\text{mol/L}$ ), respectively. The origin (time=0 h) corresponds to the time of the initiation of treatment with piperacillin/tazobactam. The axes of the correlation plots are predicted and observed piperacillin concentrations ( $\mu\text{mol/L}$ ). CRCL, creatinine clearance.



#### 4. Supplementary tables.

**Supplementary table S1. Coefficients of correlation between the values of the covariates tested, and the pharmacokinetic variables modeled. K, elimination rate constant. KCP, rate constant of the mass transfer from the central to the peripheral compartment. KPC, rate constant of the mass transfer from the peripheral to the central compartment. V, Volume of distribution. V<sub>c</sub>, volume of the central compartment.**

| Candidate covariate                    | Correlation coefficient  |         |                       |         |         |                |
|----------------------------------------|--------------------------|---------|-----------------------|---------|---------|----------------|
|                                        | Single-compartment model |         | Two-compartment model |         |         |                |
|                                        | K                        | V       | K                     | KPC     | KCP     | V <sub>c</sub> |
| Serum sodium concentration             | 0.0637                   | 0.0664  | -0.0384               | 0.0895  | 0.0491  | 0.0281         |
| Serum potassium concentration          | 0.5696                   | 0.2672  | 0.3140                | -0.2399 | -0.2959 | 0.1741         |
| Serum glucose concentration            | -0.2127                  | 0.1090  | -0.0297               | -0.2184 | -0.2325 | -0.0199        |
| Serum creatinine concentration         | -0.5330                  | -0.3787 | -0.6435               | 0.7017  | 0.0507  | 0.2462         |
| Serum urea concentration               | -0.6462                  | -0.3014 | -0.6294               | 0.7233  | 0.2409  | 0.2153         |
| Serum total bilirubin concentration    | -0.3739                  | -0.5302 | -0.5920               | 0.7229  | 0.3923  | 0.0462         |
| White blood cell count                 | 0.2698                   | 0.4800  | 0.7408                | -0.4525 | -0.0700 | -0.1677        |
| Platelet count                         | 0.3196                   | 0.1956  | 0.3921                | -0.1077 | 0.1767  | -0.1307        |
| Hematocrit                             | 0.2567                   | -0.0512 | 0.2007                | -0.0058 | 0.2053  | -0.1175        |
| Serum procalcitonin concentration      | -0.1020                  | -0.0974 | -0.0801               | -0.1923 | -0.1568 | -0.1217        |
| Serum C-reactive protein concentration | 0.0011                   | 0.2121  | 0.2909                | -0.0819 | 0.2523  | -0.0362        |
| Serum interleukin-6 concentration      | -0.1067                  | -0.1398 | 0.0921                | -0.2615 | -0.1315 | -0.3063        |
| Serum cortisol concentration           | -0.1809                  | -0.2432 | -0.1134               | 0.1785  | 0.0597  | -0.1148        |
| Serum cortisone concentration          | 0.3626                   | -0.1841 | 0.0851                | 0.2288  | -0.0723 | 0.0044         |
| Serum 11-deoxycortisol concentration   | -0.1059                  | -0.0985 | -0.0451               | -0.2089 | -0.1494 | -0.1556        |
| Serum corticosterone concentration     | -0.1096                  | -0.1329 | 0.0391                | -0.1937 | -0.1030 | -0.2311        |
| Creatinine renal clearance             | 0.8622                   | 0.5002  | 0.8037                | -0.4033 | -0.0723 | 0.0693         |

**Supplementary tables S2-S13. Performance of the fully artificial population quasi-models generated for describing the pharmacokinetics of piperacillin. K, elimination rate constant (models without a covariate). KCP, rate constant of mass transfer from the central to the peripheral compartment. KI, nonrenal component of the elimination rate constant. KPC, coefficient of mass transfer from the peripheral to the central compartment. KS, renal component of the elimination rate constant (models with a covariate). R<sup>2</sup>, determination coefficient. MAP Bayesian, maximum a posteriori probability Bayesian analysis. MSE, mean squared error. NPAG, nonparametric adaptive grid modeling. Pop-PK, population pharmacokinetic model. V, apparent volume of distribution. V<sub>c</sub>, apparent volume of the central compartment.**

**Supplementary table S2: Performance of the quasi-models for Subject 1**

*Model #1: One compartment, no covariate*

| <b>Model</b>         | <b>K</b> | <b>V</b> | <b>R<sup>2</sup></b> | <b>MSE</b> |
|----------------------|----------|----------|----------------------|------------|
| Pop-PK, NPAG         | 0.461    | 41.950   | 0.999                | 0.554      |
| Pop-PK, MAP Bayesian | 0.458    | 42.152   | 0.999                | 0.539      |
| Quasi-model 1        | 0.437    | 45.560   | 0.999                | 0.579      |
| Quasi-model 2        | 0.430    | 46.200   | 0.999                | 4.436      |
| Quasi-model 3        | 0.478    | 41.672   | 0.999                | 0.629      |
| Quasi-model 4        | 0.463    | 42.377   | 0.999                | 0.780      |
| Quasi-model 5        | 0.476    | 40.436   | 0.999                | 1.203      |
| Quasi-model 6        | 0.446    | 42.587   | 0.999                | 0.840      |
| Quasi-model 7        | 0.444    | 43.791   | 0.999                | 1.349      |
| Quasi-model 8        | 0.473    | 41.556   | 0.999                | 0.681      |
| Quasi-model 9        | 0.450    | 42.835   | 0.999                | 0.598      |
| Quasi-model 10       | 0.450    | 43.185   | 0.999                | 0.721      |
| Quasi-model 11       | 0.439    | 43.036   | 0.999                | 2.624      |
| Quasi-model 12       | 0.471    | 39.900   | 0.999                | 5.343      |
| Quasi-model 13       | 0.462    | 41.661   | 0.999                | 1.299      |
| Quasi-model 14       | 0.482    | 39.654   | 0.999                | 2.334      |
| Quasi-model 15       | 0.438    | 42.484   | 0.999                | 0.538      |
| Quasi-model 16       | 0.462    | 42.226   | 0.999                | 0.696      |
| Quasi-model 17       | 0.438    | 44.408   | 0.999                | 1.312      |
| Quasi-model 18       | 0.441    | 44.299   | 0.999                | 1.296      |
| Quasi-model 19       | 0.419    | 45.958   | 0.999                | 1.970      |
| Quasi-model 20       | 0.459    | 42.126   | 0.999                | 0.566      |
| Quasi-model 21       | 0.429    | 45.285   | 0.999                | 1.586      |
| Quasi-model 22       | 0.439    | 44.775   | 0.999                | 2.497      |
| Quasi-model 23       | 0.448    | 43.615   | 0.999                | 1.141      |
| Quasi-model 24       | 0.445    | 42.984   | 0.999                | 1.285      |
| Quasi-model 25       | 0.451    | 43.652   | 0.999                | 1.864      |
| Quasi-model 26       | 0.441    | 43.012   | 0.999                | 2.318      |
| Quasi-model 27       | 0.497    | 38.990   | 0.998                | 3.270      |
| Quasi-model 28       | 0.458    | 42.133   | 0.999                | 0.594      |

|                |       |        |       |       |
|----------------|-------|--------|-------|-------|
| Quasi-model 29 | 0.453 | 43.137 | 0.999 | 0.944 |
| Quasi-model 30 | 0.471 | 41.987 | 0.999 | 2.233 |

Model #2: Two compartments, no covariate

| <b>Model</b>            | <b>K</b> | <b>KCP</b> | <b>KPC</b> | <b>V</b> | <b>R<sup>2</sup></b> | <b>MSE</b> |
|-------------------------|----------|------------|------------|----------|----------------------|------------|
| Pop-PK, NPAG            | 1.287    | 4.663      | 2.982      | 13.492   | 0.999                | 0.508      |
| Pop-PK, MAP<br>Bayesian | 2.982    | 1.287      | 4.663      | 13.492   | 0.999                | 0.508      |
| Quasi-model 1           | 0.928    | 3.693      | 3.278      | 18.801   | 0.998                | 8.441      |
| Quasi-model 2           | 0.965    | 3.283      | 3.835      | 20.179   | 0.998                | 1.116      |
| Quasi-model 3           | 0.634    | 0.929      | 2.234      | 28.268   | 0.998                | 2.196      |
| Quasi-model 4           | 0.826    | 2.359      | 3.622      | 19.802   | 0.998                | 3.422      |
| Quasi-model 5           | 0.779    | 2.867      | 3.502      | 21.162   | 0.999                | 5.415      |
| Quasi-model 6           | 1.101    | 3.884      | 3.367      | 15.593   | 0.999                | 11.075     |
| Quasi-model 7           | 1.270    | 3.169      | 2.301      | 13.139   | 0.998                | 0.891      |
| Quasi-model 8           | 0.725    | 2.218      | 2.803      | 25.357   | 0.998                | 2.915      |
| Quasi-model 9           | 0.982    | 1.600      | 2.575      | 17.846   | 0.998                | 2.249      |
| Quasi-model 10          | 0.672    | 1.349      | 3.873      | 26.125   | 0.998                | 3.204      |
| Quasi-model 11          | 0.756    | 1.103      | 3.846      | 20.776   | 0.998                | 9.276      |
| Quasi-model 12          | 0.797    | 1.659      | 2.907      | 24.150   | 0.997                | 2.566      |
| Quasi-model 13          | 0.837    | 2.691      | 4.135      | 20.470   | 0.999                | 12.678     |
| Quasi-model 14          | 0.756    | 2.018      | 2.804      | 23.538   | 0.998                | 0.812      |
| Quasi-model 15          | 0.843    | 1.948      | 3.852      | 23.771   | 0.998                | 14.606     |
| Quasi-model 16          | 0.974    | 2.797      | 3.093      | 18.894   | 0.998                | 5.690      |
| Quasi-model 17          | 0.960    | 3.284      | 3.846      | 23.299   | 0.998                | 1.610      |
| Quasi-model 18          | 0.877    | 1.410      | 2.688      | 19.595   | 0.998                | 2.152      |
| Quasi-model 19          | 0.777    | 1.331      | 2.455      | 25.639   | 0.998                | 1.183      |
| Quasi-model 20          | 0.783    | 2.855      | 3.493      | 21.156   | 0.999                | 6.011      |
| Quasi-model 21          | 1.245    | 3.760      | 2.483      | 11.444   | 0.998                | 4.241      |
| Quasi-model 22          | 1.266    | 3.181      | 2.393      | 12.972   | 0.998                | 0.974      |
| Quasi-model 23          | 0.724    | 1.199      | 2.273      | 25.383   | 0.998                | 1.807      |
| Quasi-model 24          | 0.641    | 1.354      | 2.719      | 28.709   | 0.998                | 0.867      |
| Quasi-model 25          | 0.668    | 1.244      | 3.865      | 26.230   | 0.998                | 3.043      |
| Quasi-model 26          | 0.941    | 3.804      | 3.779      | 18.436   | 0.999                | 6.105      |
| Quasi-model 27          | 1.115    | 2.495      | 2.517      | 16.340   | 0.998                | 11.435     |
| Quasi-model 28          | 0.881    | 2.411      | 2.628      | 18.750   | 0.998                | 2.530      |
| Quasi-model 29          | 0.631    | 1.347      | 3.245      | 28.384   | 0.999                | 0.679      |
| Quasi-model 30          | 1.077    | 2.833      | 2.600      | 15.362   | 0.998                | 21.561     |

Model #3: One compartment, covariate: creatinine clearance

| <b>Model</b>            | <b>KS</b> | <b>KI</b> | <b>V<sub>c</sub></b> | <b>R<sup>2</sup></b> | <b>MSE</b> |
|-------------------------|-----------|-----------|----------------------|----------------------|------------|
| Pop-PK, NPAG            | 0.003     | 0.011     | 42.715               | 0.999                | 1.097      |
| Pop-PK, MAP<br>Bayesian | 0.003     | 0.011     | 42.305               | 0.999                | 0.536      |
| Quasi-model 1           | 0.003     | 0.037     | 39.970               | 0.999                | 1.949      |
| Quasi-model 2           | 0.003     | 0.059     | 37.068               | 0.998                | 12.316     |

|                |       |       |        |       |       |
|----------------|-------|-------|--------|-------|-------|
| Quasi-model 3  | 0.003 | 0.096 | 37.729 | 0.998 | 5.686 |
| Quasi-model 4  | 0.003 | 0.009 | 39.583 | 0.999 | 1.110 |
| Quasi-model 5  | 0.003 | 0.076 | 44.806 | 0.999 | 3.356 |
| Quasi-model 6  | 0.003 | 0.055 | 41.820 | 0.999 | 0.579 |
| Quasi-model 7  | 0.003 | 0.097 | 41.570 | 0.999 | 1.439 |
| Quasi-model 8  | 0.003 | 0.040 | 37.363 | 0.998 | 6.056 |
| Quasi-model 9  | 0.003 | 0.022 | 43.628 | 0.999 | 0.811 |
| Quasi-model 10 | 0.003 | 0.027 | 38.822 | 0.999 | 1.593 |
| Quasi-model 11 | 0.003 | 0.028 | 40.104 | 0.999 | 1.816 |
| Quasi-model 12 | 0.003 | 0.058 | 42.824 | 0.999 | 1.214 |
| Quasi-model 13 | 0.003 | 0.029 | 42.144 | 0.999 | 1.002 |
| Quasi-model 14 | 0.003 | 0.027 | 43.054 | 0.999 | 1.271 |
| Quasi-model 15 | 0.003 | 0.074 | 43.158 | 0.999 | 1.183 |
| Quasi-model 16 | 0.003 | 0.059 | 42.495 | 0.999 | 0.688 |
| Quasi-model 17 | 0.003 | 0.062 | 42.850 | 0.999 | 0.550 |
| Quasi-model 18 | 0.003 | 0.087 | 40.113 | 0.999 | 2.523 |
| Quasi-model 19 | 0.003 | 0.048 | 41.281 | 0.999 | 0.950 |
| Quasi-model 20 | 0.003 | 0.059 | 42.592 | 0.999 | 0.534 |
| Quasi-model 21 | 0.003 | 0.093 | 43.235 | 0.999 | 2.516 |
| Quasi-model 22 | 0.003 | 0.060 | 41.274 | 0.999 | 1.350 |
| Quasi-model 23 | 0.002 | 0.065 | 48.180 | 0.999 | 6.872 |
| Quasi-model 24 | 0.003 | 0.069 | 42.011 | 0.999 | 0.714 |
| Quasi-model 25 | 0.003 | 0.043 | 44.254 | 0.999 | 2.476 |
| Quasi-model 26 | 0.003 | 0.081 | 41.875 | 0.999 | 1.965 |
| Quasi-model 27 | 0.003 | 0.070 | 42.252 | 0.999 | 2.036 |
| Quasi-model 28 | 0.003 | 0.250 | 42.445 | 0.999 | 1.317 |
| Quasi-model 29 | 0.003 | 0.072 | 44.226 | 0.999 | 1.191 |
| Quasi-model 30 | 0.003 | 0.660 | 41.555 | 0.999 | 0.748 |

*Model #4: Two compartments, covariate: creatinine clearance*

| <b>Model</b>   | <b>KS</b> | <b>KCP</b> | <b>KPC</b> | <b>KI</b> | <b>V<sub>c</sub></b> | <b>R<sup>2</sup></b> | <b>MSE</b> |
|----------------|-----------|------------|------------|-----------|----------------------|----------------------|------------|
| Pop-PK, NPAG   | 0.004     | 4.057      | 5.739      | 0.306     | 23.100               | 0.999                | 0.536      |
| Pop-PK, MAP    | 0.004     | 4.031      | 5.771      | 0.305     | 23.213               | 0.999                | 1.045      |
| Bayesian       |           |            |            |           |                      |                      |            |
| Quasi-model 1  | 0.004     | 2.162      | 2.773      | 0.118     | 23.046               | 0.999                | 1.396      |
| Quasi-model 2  | 0.004     | 1.785      | 3.043      | 0.241     | 23.355               | 0.999                | 4.229      |
| Quasi-model 3  | 0.004     | 1.816      | 3.178      | 0.334     | 22.270               | 0.999                | 2.269      |
| Quasi-model 4  | 0.007     | 5.095      | 5.492      | 0.048     | 17.023               | 0.999                | 78.540     |
| Quasi-model 5  | 0.004     | 4.329      | 5.514      | 0.227     | 20.874               | 0.999                | 29.530     |
| Quasi-model 6  | 0.007     | 4.288      | 3.644      | 0.120     | 15.178               | 0.999                | 4.764      |
| Quasi-model 7  | 0.005     | 2.701      | 4.783      | 0.041     | 23.481               | 0.999                | 6.970      |
| Quasi-model 8  | 0.007     | 1.784      | 1.593      | 0.111     | 14.273               | 0.997                | 18.588     |
| Quasi-model 9  | 0.006     | 3.452      | 2.835      | 0.115     | 18.603               | 0.999                | 0.860      |
| Quasi-model 10 | 0.005     | 4.498      | 4.406      | 0.268     | 19.227               | 0.999                | 8.833      |
| Quasi-model 11 | 0.005     | 3.729      | 4.272      | 0.206     | 21.661               | 0.999                | 7.773      |
| Quasi-model 12 | 0.006     | 5.064      | 5.252      | 0.238     | 19.932               | 0.999                | 1.564      |
| Quasi-model 13 | 0.006     | 2.592      | 2.253      | 0.185     | 20.866               | 0.999                | 1.701      |

|                |       |       |       |       |        |       |        |
|----------------|-------|-------|-------|-------|--------|-------|--------|
| Quasi-model 14 | 0.010 | 3.832 | 2.156 | 0.301 | 8.846  | 0.998 | 83.857 |
| Quasi-model 15 | 0.006 | 4.312 | 3.532 | 0.263 | 17.411 | 0.999 | 8.206  |
| Quasi-model 16 | 0.004 | 1.340 | 1.679 | 0.244 | 19.240 | 0.997 | 2.758  |
| Quasi-model 17 | 0.004 | 4.648 | 5.289 | 0.318 | 23.783 | 0.998 | 4.375  |
| Quasi-model 18 | 0.005 | 2.939 | 3.499 | 0.184 | 19.644 | 0.998 | 20.566 |
| Quasi-model 19 | 0.006 | 3.539 | 3.698 | 0.139 | 21.156 | 0.999 | 1.055  |
| Quasi-model 20 | 0.009 | 2.524 | 1.546 | 0.126 | 13.562 | 0.996 | 3.275  |
| Quasi-model 21 | 0.006 | 4.236 | 3.825 | 0.114 | 19.557 | 0.999 | 9.238  |
| Quasi-model 22 | 0.006 | 3.058 | 2.578 | 0.154 | 18.146 | 0.998 | 2.978  |
| Quasi-model 23 | 0.004 | 2.737 | 3.262 | 0.256 | 22.370 | 0.999 | 0.764  |
| Quasi-model 24 | 0.006 | 4.338 | 4.038 | 0.129 | 19.652 | 0.999 | 6.677  |
| Quasi-model 25 | 0.005 | 2.738 | 2.752 | 0.259 | 19.620 | 0.999 | 0.963  |
| Quasi-model 26 | 0.005 | 3.174 | 3.589 | 0.098 | 22.797 | 0.999 | 2.245  |
| Quasi-model 27 | 0.006 | 1.770 | 1.974 | 0.197 | 16.605 | 0.998 | 16.036 |
| Quasi-model 28 | 0.005 | 4.461 | 3.706 | 0.237 | 19.322 | 0.999 | 0.629  |
| Quasi-model 29 | 0.007 | 3.780 | 3.442 | 0.245 | 18.187 | 0.998 | 7.369  |
| Quasi-model 30 | 0.007 | 4.272 | 3.705 | 0.246 | 17.381 | 0.999 | 38.327 |

**Supplementary table S3: Performance of the quasi-models for Subject 2***Model #1: One compartment, no covariate*

| <b>Model</b>   | <b>K</b> | <b>V</b> | <b>R<sup>2</sup></b> | <b>MSE</b> |
|----------------|----------|----------|----------------------|------------|
| Pop-PK, NPAG   | 0.162    | 35.678   | 0.969                | 22.774     |
| Pop-PK, MAP    | 0.165    | 35.289   | 0.938                | 22.597     |
| Quasi-model 1  | 0.144    | 33.199   | 0.938                | 22.597     |
| Quasi-model 2  | 0.169    | 36.902   | 0.938                | 47.374     |
| Quasi-model 3  | 0.154    | 36.368   | 0.938                | 49.029     |
| Quasi-model 4  | 0.163    | 35.190   | 0.938                | 25.111     |
| Quasi-model 5  | 0.161    | 34.959   | 0.938                | 23.008     |
| Quasi-model 6  | 0.173    | 33.185   | 0.938                | 31.119     |
| Quasi-model 7  | 0.156    | 38.177   | 0.938                | 36.506     |
| Quasi-model 8  | 0.174    | 37.787   | 0.938                | 26.485     |
| Quasi-model 9  | 0.171    | 35.846   | 0.939                | 79.781     |
| Quasi-model 10 | 0.162    | 35.520   | 0.938                | 23.738     |
| Quasi-model 11 | 0.180    | 32.406   | 0.938                | 41.174     |
| Quasi-model 12 | 0.156    | 36.063   | 0.939                | 156.513    |
| Quasi-model 13 | 0.169    | 38.058   | 0.938                | 27.033     |
| Quasi-model 14 | 0.158    | 35.181   | 0.938                | 116.942    |
| Quasi-model 15 | 0.175    | 37.496   | 0.938                | 30.457     |
| Quasi-model 16 | 0.161    | 37.216   | 0.938                | 52.015     |
| Quasi-model 17 | 0.157    | 35.854   | 0.938                | 38.286     |
| Quasi-model 18 | 0.163    | 34.373   | 0.938                | 40.993     |
| Quasi-model 19 | 0.164    | 38.261   | 0.938                | 27.527     |
| Quasi-model 20 | 0.178    | 34.271   | 0.938                | 128.264    |
| Quasi-model 21 | 0.158    | 39.229   | 0.939                | 35.384     |
| Quasi-model 22 | 0.168    | 32.539   | 0.938                | 77.567     |
| Quasi-model 23 | 0.169    | 36.699   | 0.938                | 45.675     |
| Quasi-model 24 | 0.168    | 36.511   | 0.938                | 22.552     |
| Quasi-model 25 | 0.165    | 35.682   | 0.938                | 25.347     |
| Quasi-model 26 | 0.058    | 37.036   | 0.938                | 26.730     |
| Quasi-model 27 | 0.160    | 33.939   | 0.938                | 44.798     |
| Quasi-model 28 | 0.154    | 38.564   | 0.938                | 30.223     |
| Quasi-model 29 | 0.168    | 34.714   | 0.938                | 27.238     |
| Quasi-model 30 | 0.166    | 35.611   | 0.938                | 24.184     |

*Model #2: Two compartments, no covariate*

| <b>Model</b>  | <b>K</b> | <b>KCP</b> | <b>KPC</b> | <b>V</b> | <b>R<sup>2</sup></b> | <b>MSE</b> |
|---------------|----------|------------|------------|----------|----------------------|------------|
| Pop-PK, NPAG  | 1.292    | 4.678      | 2.995      | 13.550   | 0.985                | 0.508      |
| Pop-PK, MAP   | 1.287    | 4.663      | 2.982      | 13.492   | 0.964                | 16.332     |
| Bayesian      |          |            |            |          |                      |            |
| Quasi-model 1 | 0.339    | 3.805      | 3.425      | 16.118   | 0.954                | 55.386     |
| Quasi-model 2 | 0.360    | 2.551      | 2.674      | 13.973   | 0.966                | 51.596     |
| Quasi-model 3 | 0.270    | 2.945      | 2.773      | 19.548   | 0.954                | 75.722     |
| Quasi-model 4 | 0.229    | 2.058      | 4.336      | 23.488   | 0.948                | 32.384     |
| Quasi-model 5 | 0.337    | 2.903      | 2.184      | 15.357   | 0.960                | 32.789     |

|                |       |       |       |        |       |         |
|----------------|-------|-------|-------|--------|-------|---------|
| Quasi-model 6  | 0.303 | 2.524 | 1.768 | 16.315 | 0.961 | 16.941  |
| Quasi-model 7  | 0.319 | 3.210 | 2.144 | 15.931 | 0.956 | 25.224  |
| Quasi-model 8  | 0.273 | 2.403 | 2.208 | 16.587 | 0.960 | 20.884  |
| Quasi-model 9  | 0.291 | 2.751 | 3.204 | 16.472 | 0.962 | 227.949 |
| Quasi-model 10 | 0.326 | 3.525 | 2.353 | 14.151 | 0.958 | 43.970  |
| Quasi-model 11 | 0.312 | 3.174 | 2.233 | 14.482 | 0.966 | 45.001  |
| Quasi-model 12 | 0.270 | 2.661 | 2.721 | 17.956 | 0.956 | 19.998  |
| Quasi-model 13 | 0.252 | 3.148 | 3.159 | 20.226 | 0.958 | 47.325  |
| Quasi-model 14 | 0.348 | 3.659 | 2.675 | 15.586 | 0.964 | 15.219  |
| Quasi-model 15 | 0.252 | 3.536 | 4.394 | 21.920 | 0.952 | 30.874  |
| Quasi-model 16 | 0.335 | 4.506 | 3.137 | 16.008 | 0.956 | 80.099  |
| Quasi-model 17 | 0.353 | 3.527 | 1.827 | 14.174 | 0.964 | 65.168  |
| Quasi-model 18 | 0.283 | 2.78  | 2.180 | 15.229 | 0.958 | 56.027  |
| Quasi-model 19 | 0.247 | 3.262 | 4.415 | 21.589 | 0.948 | 44.119  |
| Quasi-model 20 | 0.346 | 2.903 | 2.182 | 15.345 | 0.959 | 20.913  |
| Quasi-model 21 | 0.303 | 2.525 | 1.955 | 16.590 | 0.960 | 26.090  |
| Quasi-model 22 | 0.261 | 3.188 | 2.829 | 17.767 | 0.953 | 29.699  |
| Quasi-model 23 | 0.274 | 2.571 | 3.082 | 16.561 | 0.956 | 20.516  |
| Quasi-model 24 | 0.286 | 2.756 | 3.237 | 17.924 | 0.961 | 265.71  |
| Quasi-model 25 | 0.272 | 2.433 | 3.237 | 22.292 | 0.959 | 318.759 |
| Quasi-model 26 | 0.286 | 3.012 | 1.755 | 14.321 | 0.962 | 62.512  |
| Quasi-model 27 | 0.285 | 2.69  | 3.076 | 17.929 | 0.951 | 25.184  |
| Quasi-model 28 | 0.286 | 3.102 | 3.304 | 18.316 | 0.958 | 65.133  |
| Quasi-model 29 | 0.247 | 3.262 | 4.415 | 21.589 | 0.948 | 44.119  |
| Quasi-model 30 | 0.272 | 3.014 | 3.235 | 17.634 | 0.951 | 89.276  |

*Model #3: One compartment, covariate: creatinine clearance*

| <b>Model</b>   | <b>KS</b> | <b>KI</b> | <b>V<sub>c</sub></b> | <b>R<sup>2</sup></b> | <b>MSE</b> |
|----------------|-----------|-----------|----------------------|----------------------|------------|
| Pop-PK, NPAG   | 0.001     | 0.054     | 35.475               | 0.969                | 22.530     |
| Pop-PK, MAP    |           |           |                      |                      |            |
| Bayesian       | 0.001     | 0.054     | 35.449               | 0.938                | 22.564     |
| Quasi-model 1  | 0.002     | 0.017     | 32.503               | 0.938                | 110.179    |
| Quasi-model 2  | 0.001     | 0.06      | 32.842               | 0.938                | 29.271     |
| Quasi-model 3  | 0.002     | 0.042     | 33.010               | 0.938                | 73.226     |
| Quasi-model 4  | 0.001     | 0.063     | 37.996               | 0.938                | 76.828     |
| Quasi-model 5  | 0.002     | 0.021     | 37.956               | 0.938                | 48.021     |
| Quasi-model 6  | 0.002     | 0.041     | 34.701               | 0.938                | 51.483     |
| Quasi-model 7  | 0.002     | 0.037     | 33.617               | 0.938                | 67.574     |
| Quasi-model 8  | 0.002     | 0.033     | 35.870               | 0.938                | 35.730     |
| Quasi-model 9  | 0.002     | 0.041     | 34.914               | 0.938                | 24.769     |
| Quasi-model 10 | 0.001     | 0.054     | 31.457               | 0.938                | 123.65     |
| Quasi-model 11 | 0.001     | 0.076     | 37.356               | 0.938                | 23.565     |
| Quasi-model 12 | 0.001     | 0.045     | 36.624               | 0.938                | 41.761     |
| Quasi-model 13 | 0.002     | 0.025     | 32.816               | 0.938                | 42.695     |
| Quasi-model 14 | 0.001     | 0.059     | 37.399               | 0.938                | 22.853     |
| Quasi-model 15 | 0.001     | 0.044     | 34.216               | 0.938                | 37.701     |
| Quasi-model 16 | 0.001     | 0.058     | 34.990               | 0.938                | 41.866     |

|                |       |       |        |       |         |
|----------------|-------|-------|--------|-------|---------|
| Quasi-model 17 | 0.002 | 0.028 | 37.158 | 0.938 | 64.372  |
| Quasi-model 18 | 0.002 | 0.038 | 33.073 | 0.938 | 65.665  |
| Quasi-model 19 | 0.002 | 0.044 | 35.424 | 0.938 | 25.573  |
| Quasi-model 20 | 0.002 | 0.013 | 32.029 | 0.938 | 253.216 |
| Quasi-model 21 | 0.001 | 0.064 | 33.307 | 0.938 | 40.453  |
| Quasi-model 22 | 0.002 | 0.049 | 38.053 | 0.938 | 44.842  |
| Quasi-model 23 | 0.002 | 0.04  | 38.323 | 0.938 | 45.101  |
| Quasi-model 24 | 0.001 | 0.053 | 40.584 | 0.938 | 214.218 |
| Quasi-model 25 | 0.002 | 0.045 | 33.557 | 0.938 | 23.568  |
| Quasi-model 26 | 0.002 | 0.046 | 38.011 | 0.938 | 30.580  |
| Quasi-model 27 | 0.002 | 0.056 | 34.010 | 0.938 | 32.331  |
| Quasi-model 28 | 0.002 | 0.52  | 35.402 | 0.938 | 50.117  |
| Quasi-model 29 | 0.001 | 0.081 | 34.733 | 0.938 | 24.320  |
| Quasi-model 30 | 0.001 | 0.048 | 36.134 | 0.938 | 23.489  |

Model #4: Two compartments, covariate: creatinine clearance

| <b>Model</b>   | <b>KS</b> | <b>KCP</b> | <b>KPC</b> | <b>KI</b> | <b>V<sub>c</sub></b> | <b>R<sup>2</sup></b> | <b>MSE</b> |
|----------------|-----------|------------|------------|-----------|----------------------|----------------------|------------|
| Pop-PK, NPAG   | 0.007     | 4.405      | 1.157      | 0.201     | 6.300                | 0.986                | 10.245     |
| Pop-PK, MAP    |           |            |            |           |                      |                      |            |
| Bayesian       | 0.007     | 4.398      | 1.144      | 0.200     | 6.303                | 0.972                | 10.328     |
| Quasi-model 1  | 0.002     | 4.963      | 2.945      | 0.155     | 11.105               | 0.952                | 70.987     |
| Quasi-model 2  | 0.002     | 3.358      | 5.881      | 0.083     | 20.999               | 0.943                | 266.620    |
| Quasi-model 3  | 0.002     | 3.980      | 3.410      | 0.158     | 18.613               | 0.950                | 27.805     |
| Quasi-model 4  | 0.001     | 2.605      | 2.394      | 0.175     | 17.639               | 0.959                | 100.505    |
| Quasi-model 5  | 0.002     | 5.313      | 5.626      | 0.146     | 16.227               | 0.946                | 270.863    |
| Quasi-model 6  | 0.003     | 4.114      | 4.194      | 0.076     | 20.590               | 0.949                | 184.376    |
| Quasi-model 7  | 0.002     | 4.314      | 3.839      | 0.153     | 18.524               | 0.957                | 46.081     |
| Quasi-model 8  | 0.003     | 2.801      | 1.834      | 0.180     | 13.867               | 0.960                | 40.052     |
| Quasi-model 9  | 0.003     | 3.800      | 3.935      | 0.050     | 18.593               | 0.949                | 125.268    |
| Quasi-model 10 | 0.002     | 3.921      | 3.080      | 0.118     | 18.009               | 0.962                | 152.032    |
| Quasi-model 11 | 0.003     | 3.631      | 2.203      | 0.130     | 12.166               | 0.957                | 60.456     |
| Quasi-model 12 | 0.003     | 4.123      | 3.806      | 0.078     | 16.880               | 0.954                | 35.214     |
| Quasi-model 13 | 0.003     | 4.386      | 2.526      | 0.123     | 16.047               | 0.959                | 199.367    |
| Quasi-model 14 | 0.003     | 3.903      | 2.885      | 0.135     | 13.045               | 0.954                | 83.213     |
| Quasi-model 15 | 0.002     | 3.993      | 2.179      | 0.193     | 20.058               | 0.954                | 57.918     |
| Quasi-model 16 | 0.003     | 2.990      | 3.153      | 0.080     | 20.138               | 0.955                | 114.024    |
| Quasi-model 17 | 0.001     | 3.906      | 1.680      | 0.204     | 16.134               | 0.960                | 16.599     |
| Quasi-model 18 | 0.003     | 4.675      | 3.644      | 0.158     | 18.128               | 0.956                | 168.955    |
| Quasi-model 19 | 0.003     | 3.892      | 2.884      | 0.140     | 21.547               | 0.958                | 23.92      |
| Quasi-model 20 | 0.003     | 4.312      | 2.804      | 0.208     | 14.872               | 0.955                | 71.574     |
| Quasi-model 21 | 0.003     | 4.800      | 5.511      | 0.035     | 18.554               | 0.945                | 54.664     |
| Quasi-model 22 | 0.002     | 4.002      | 1.938      | 0.249     | 13.879               | 0.960                | 87.428     |
| Quasi-model 23 | 0.001     | 4.276      | 2.298      | 0.202     | 17.760               | 0.959                | 130.169    |
| Quasi-model 24 | 0.002     | 4.480      | 3.128      | 0.165     | 17.306               | 0.951                | 24.091     |
| Quasi-model 25 | 0.003     | 2.492      | 2.663      | 0.077     | 17.791               | 0.955                | 63.028     |
| Quasi-model 26 | 0.003     | 4.593      | 3.714      | 0.079     | 16.473               | 0.950                | 74.783     |
| Quasi-model 27 | 0.003     | 4.342      | 3.488      | 0.154     | 16.953               | 0.957                | 32.449     |



|                |       |       |       |       |        |       |         |
|----------------|-------|-------|-------|-------|--------|-------|---------|
| Quasi-model 28 | 0.003 | 4.144 | 3.909 | 0.085 | 15.519 | 0.956 | 45.901  |
| Quasi-model 29 | 0.003 | 2.865 | 3.254 | 0.059 | 18.562 | 0.952 | 34.382  |
| Quasi-model 30 | 0.005 | 4.810 | 2.470 | 0.158 | 11.095 | 0.957 | 105.791 |

**Supplementary table S4: Performance of the quasi-models for Subject 3**

*Model #1: One compartment, no covariate*

| <b>Model</b>   | <b>K</b> | <b>V</b> | <b>R<sup>2</sup></b> | <b>MSE</b> |
|----------------|----------|----------|----------------------|------------|
| Pop-PK, NPAG   | 0.474    | 91.450   | 0.987                | 2.317      |
| Pop-PK, MAP    | 0.476    | 92.001   | 0.984                | 6.067      |
| Quasi-model 1  | 0.461    | 89.607   | 0.982                | 2.238      |
| Quasi-model 2  | 0.470    | 90.449   | 0.983                | 1.949      |
| Quasi-model 3  | 0.481    | 82.046   | 0.984                | 2.294      |
| Quasi-model 4  | 0.483    | 83.816   | 0.984                | 1.704      |
| Quasi-model 5  | 0.454    | 89.465   | 0.984                | 1.724      |
| Quasi-model 6  | 0.512    | 78.904   | 0.986                | 1.740      |
| Quasi-model 7  | 0.480    | 84.732   | 0.983                | 1.782      |
| Quasi-model 8  | 0.487    | 83.046   | 0.985                | 1.639      |
| Quasi-model 9  | 0.486    | 83.262   | 0.984                | 1.668      |
| Quasi-model 10 | 0.475    | 84.334   | 0.983                | 1.820      |
| Quasi-model 11 | 0.480    | 83.990   | 0.984                | 1.675      |
| Quasi-model 12 | 0.494    | 81.344   | 0.984                | 1.657      |
| Quasi-model 13 | 0.451    | 91.323   | 0.983                | 2.029      |
| Quasi-model 14 | 0.454    | 92.637   | 0.983                | 2.105      |
| Quasi-model 15 | 0.478    | 85.830   | 0.984                | 1.623      |
| Quasi-model 16 | 0.453    | 91.849   | 0.982                | 2.276      |
| Quasi-model 17 | 0.470    | 87.035   | 0.984                | 1.800      |
| Quasi-model 18 | 0.463    | 87.917   | 0.983                | 1.817      |
| Quasi-model 19 | 0.482    | 83.777   | 0.984                | 1.738      |
| Quasi-model 20 | 0.466    | 90.453   | 0.984                | 1.789      |
| Quasi-model 21 | 0.458    | 88.865   | 0.983                | 2.070      |
| Quasi-model 22 | 0.485    | 85.101   | 0.984                | 1.685      |
| Quasi-model 23 | 0.466    | 89.013   | 0.983                | 2.257      |
| Quasi-model 24 | 0.450    | 93.472   | 0.982                | 2.399      |
| Quasi-model 25 | 0.454    | 91.701   | 0.983                | 2.127      |
| Quasi-model 26 | 0.460    | 90.304   | 0.983                | 1.917      |
| Quasi-model 27 | 0.470    | 84.822   | 0.984                | 1.684      |
| Quasi-model 28 | 0.500    | 79.364   | 0.985                | 1.626      |
| Quasi-model 29 | 0.459    | 91.201   | 0.983                | 1.978      |
| Quasi-model 30 | 0.464    | 85.779   | 0.984                | 1.703      |

*Model #2: Two compartments, no covariate*

| <b>Model</b> | <b>K</b> | <b>KCP</b> | <b>KPC</b> | <b>V</b> | <b>R<sup>2</sup></b> | <b>MSE</b> |
|--------------|----------|------------|------------|----------|----------------------|------------|
| Pop-PK, NPAG | 1.356    | 1.263      | 0.718      | 23.750   | 0.997                | 8.441      |
| Pop-PK, MAP  | 1.360    | 1.282      | 0.719      | 23.853   | 0.986                | 5.530      |
| Bayesian     |          |            |            |          |                      |            |

|                |       |       |       |        |       |       |
|----------------|-------|-------|-------|--------|-------|-------|
| Quasi-model 1  | 1.236 | 3.145 | 1.622 | 27.474 | 0.991 | 1.800 |
| Quasi-model 2  | 1.204 | 2.626 | 2.008 | 31.969 | 0.987 | 3.801 |
| Quasi-model 3  | 1.140 | 1.987 | 1.886 | 31.165 | 0.987 | 1.783 |
| Quasi-model 4  | 1.253 | 1.882 | 1.419 | 23.788 | 0.992 | 6.220 |
| Quasi-model 5  | 1.267 | 2.483 | 1.539 | 28.146 | 0.989 | 1.479 |
| Quasi-model 6  | 1.376 | 2.932 | 1.852 | 26.581 | 0.989 | 1.715 |
| Quasi-model 7  | 1.205 | 3.117 | 2.102 | 33.801 | 0.985 | 6.858 |
| Quasi-model 8  | 1.079 | 2.460 | 2.104 | 31.573 | 0.988 | 3.686 |
| Quasi-model 9  | 1.062 | 1.878 | 1.738 | 32.105 | 0.988 | 2.131 |
| Quasi-model 10 | 1.434 | 3.538 | 1.952 | 27.547 | 0.986 | 3.412 |
| Quasi-model 11 | 1.185 | 1.349 | 0.817 | 24.079 | 0.992 | 0.920 |
| Quasi-model 12 | 1.316 | 1.237 | 0.983 | 24.066 | 0.992 | 2.307 |
| Quasi-model 13 | 1.407 | 3.838 | 2.064 | 27.801 | 0.989 | 1.553 |
| Quasi-model 14 | 1.174 | 3.736 | 2.259 | 29.337 | 0.988 | 7.468 |
| Quasi-model 15 | 1.210 | 2.005 | 1.447 | 29.446 | 0.990 | 1.922 |
| Quasi-model 16 | 1.240 | 2.151 | 1.383 | 25.735 | 0.991 | 2.419 |
| Quasi-model 17 | 1.237 | 1.817 | 1.775 | 27.038 | 0.990 | 1.682 |
| Quasi-model 18 | 1.137 | 1.982 | 1.887 | 31.240 | 0.987 | 1.540 |
| Quasi-model 19 | 1.302 | 2.332 | 1.803 | 27.301 | 0.989 | 2.430 |
| Quasi-model 20 | 1.268 | 2.799 | 1.933 | 28.163 | 0.987 | 1.705 |
| Quasi-model 21 | 1.313 | 2.934 | 1.860 | 26.586 | 0.989 | 1.412 |
| Quasi-model 22 | 1.190 | 3.123 | 2.113 | 33.777 | 0.985 | 5.164 |
| Quasi-model 23 | 1.259 | 2.764 | 2.074 | 28.195 | 0.987 | 1.824 |
| Quasi-model 24 | 1.384 | 3.608 | 2.268 | 27.569 | 0.986 | 1.812 |
| Quasi-model 25 | 1.435 | 3.520 | 1.940 | 26.895 | 0.988 | 2.440 |
| Quasi-model 26 | 1.248 | 3.419 | 2.008 | 29.059 | 0.988 | 1.217 |
| Quasi-model 27 | 1.197 | 3.862 | 1.870 | 28.681 | 0.993 | 0.755 |
| Quasi-model 28 | 1.332 | 3.287 | 2.187 | 27.393 | 0.987 | 2.134 |
| Quasi-model 29 | 1.430 | 2.473 | 1.369 | 26.282 | 0.99  | 2.702 |
| Quasi-model 30 | 1.216 | 2.612 | 2.201 | 29.627 | 0.989 | 1.163 |

*Model #3: One compartment, covariate: creatinine clearance*

| <b>Model</b>   | <b>KS</b> | <b>KI</b> | <b>V<sub>c</sub></b> | <b>R<sup>2</sup></b> | <b>MSE</b> |
|----------------|-----------|-----------|----------------------|----------------------|------------|
| Pop-PK, NPAG   | 0.004     | 0.022     | 72.525               | 0.990                | 4.721      |
| Pop-PK, MAP    |           |           |                      |                      |            |
| Bayesian       | 0.004     | 0.022     | 72.608               | 0.990                | 5.930      |
| Quasi-model 1  | 0.003     | 0.016     | 78.576               | 0.986                | 1.953      |
| Quasi-model 2  | 0.003     | 0.018     | 77.008               | 0.987                | 1.917      |
| Quasi-model 3  | 0.003     | 0.066     | 74.390               | 0.986                | 3.815      |
| Quasi-model 4  | 0.003     | 0.086     | 73.844               | 0.987                | 2.253      |
| Quasi-model 5  | 0.003     | 0.065     | 79.137               | 0.985                | 2.258      |
| Quasi-model 6  | 0.003     | 0.055     | 75.168               | 0.987                | 2.207      |
| Quasi-model 7  | 0.003     | 0.015     | 78.107               | 0.986                | 2.092      |
| Quasi-model 8  | 0.003     | 0.071     | 73.997               | 0.987                | 2.229      |
| Quasi-model 9  | 0.003     | 0.076     | 72.904               | 0.987                | 2.760      |
| Quasi-model 10 | 0.003     | 0.017     | 78.528               | 0.986                | 1.756      |
| Quasi-model 11 | 0.003     | 0.045     | 78.020               | 0.986                | 2.876      |

|                |       |       |        |       |       |
|----------------|-------|-------|--------|-------|-------|
| Quasi-model 12 | 0.003 | 0.073 | 76.698 | 0.986 | 2.134 |
| Quasi-model 13 | 0.003 | 0.086 | 75.113 | 0.987 | 2.066 |
| Quasi-model 14 | 0.003 | 0.038 | 74.868 | 0.988 | 2.320 |
| Quasi-model 15 | 0.003 | 0.078 | 79.764 | 0.986 | 1.727 |
| Quasi-model 16 | 0.003 | 0.059 | 80.031 | 0.986 | 2.045 |
| Quasi-model 17 | 0.003 | 0.031 | 76.413 | 0.987 | 1.926 |
| Quasi-model 18 | 0.003 | 0.027 | 75.678 | 0.987 | 2.147 |
| Quasi-model 19 | 0.003 | 0.082 | 75.270 | 0.987 | 2.083 |
| Quasi-model 20 | 0.003 | 0.018 | 76.956 | 0.986 | 2.045 |
| Quasi-model 21 | 0.003 | 0.024 | 78.633 | 0.986 | 1.905 |
| Quasi-model 22 | 0.003 | 0.028 | 71.143 | 0.987 | 4.298 |
| Quasi-model 23 | 0.003 | 0.062 | 78.368 | 0.986 | 1.770 |
| Quasi-model 24 | 0.003 | 0.090 | 74.923 | 0.986 | 2.775 |
| Quasi-model 25 | 0.003 | 0.074 | 78.269 | 0.986 | 2.285 |
| Quasi-model 26 | 0.003 | 0.053 | 77.809 | 0.986 | 2.121 |
| Quasi-model 27 | 0.003 | 0.073 | 76.735 | 0.987 | 1.998 |
| Quasi-model 28 | 0.003 | 0.087 | 75.819 | 0.986 | 3.062 |
| Quasi-model 29 | 0.003 | 0.012 | 77.417 | 0.986 | 1.989 |
| Quasi-model 30 | 0.003 | 0.096 | 77.643 | 0.986 | 1.888 |

Model #4: Two compartments, covariate: creatinine clearance

| <b>Model</b>   | <b>KS</b> | <b>KCP</b> | <b>KPC</b> | <b>KI</b> | <b>V<sub>c</sub></b> | <b>R<sup>2</sup></b> | <b>MSE</b> |
|----------------|-----------|------------|------------|-----------|----------------------|----------------------|------------|
| Pop-PK, NPAG   | 0.010     | 1.679      | 0.751      | 0.222     | 17.100               | 0.997                | 0.603      |
| Pop-PK, MAP    |           |            |            |           |                      |                      |            |
| Bayesian       | 0.010     | 1.703      | 0.755      | 0.222     | 17.132               | 0.989                | 1.733      |
| Quasi-model 1  | 0.009     | 3.917      | 1.923      | 0.229     | 20.842               | 0.990                | 13.678     |
| Quasi-model 2  | 0.013     | 2.834      | 1.374      | 0.08      | 15.025               | 0.990                | 1.256      |
| Quasi-model 3  | 0.01      | 1.282      | 0.76       | 0.343     | 13.680               | 0.987                | 7.555      |
| Quasi-model 4  | 0.009     | 3.162      | 1.464      | 0.112     | 20.206               | 0.992                | 5.846      |
| Quasi-model 5  | 0.008     | 1.452      | 0.092      | 0.288     | 16.691               | 0.991                | 11.324     |
| Quasi-model 6  | 0.011     | 2.388      | 1.045      | 0.149     | 16.744               | 0.989                | 8.551      |
| Quasi-model 7  | 0.013     | 1.084      | 0.550      | 0.175     | 9.765                | 0.978                | 16.063     |
| Quasi-model 8  | 0.010     | 4.493      | 1.563      | 0.183     | 20.605               | 0.989                | 1.286      |
| Quasi-model 9  | 0.015     | 3.745      | 1.638      | 0.192     | 13.544               | 0.989                | 6.612      |
| Quasi-model 10 | 0.007     | 3.005      | 1.788      | 0.336     | 24.893               | 0.987                | 1.801      |
| Quasi-model 11 | 0.011     | 4.511      | 1.495      | 0.158     | 20.617               | 0.989                | 2.478      |
| Quasi-model 12 | 0.009     | 4.408      | 2.036      | 0.292     | 23.484               | 0.986                | 3.349      |
| Quasi-model 13 | 0.009     | 1.147      | 0.815      | 0.039     | 18.808               | 0.990                | 4.236      |
| Quasi-model 14 | 0.010     | 5.238      | 1.844      | 0.253     | 20.063               | 0.986                | 1.879      |
| Quasi-model 15 | 0.011     | 1.738      | 0.956      | 0.020     | 19.679               | 0.988                | 4.105      |
| Quasi-model 16 | 0.011     | 3.598      | 1.596      | 0.064     | 19.977               | 0.988                | 7.132      |
| Quasi-model 17 | 0.008     | 2.618      | 1.553      | 0.296     | 22.582               | 0.989                | 2.714      |
| Quasi-model 18 | 0.009     | 3.365      | 1.436      | 0.146     | 22.287               | 0.989                | 2.739      |
| Quasi-model 19 | 0.014     | 2.930      | 1.077      | 0.284     | 12.765               | 0.988                | 1.830      |
| Quasi-model 20 | 0.012     | 3.079      | 1.230      | 0.169     | 13.076               | 0.989                | 8.693      |
| Quasi-model 21 | 0.010     | 2.962      | 0.967      | 0.170     | 21.292               | 0.989                | 1.196      |
| Quasi-model 22 | 0.009     | 2.146      | 1.001      | 0.009     | 19.502               | 0.993                | 10.474     |

|                |       |       |       |       |        |       |        |
|----------------|-------|-------|-------|-------|--------|-------|--------|
| Quasi-model 23 | 0.010 | 1.379 | 0.790 | 0.283 | 13.746 | 0.989 | 15.076 |
| Quasi-model 24 | 0.009 | 1.942 | 0.940 | 0.201 | 20.221 | 0.989 | 1.607  |
| Quasi-model 25 | 0.009 | 2.644 | 1.408 | 0.209 | 22.548 | 0.989 | 2.302  |
| Quasi-model 26 | 0.010 | 4.394 | 1.342 | 0.217 | 21.345 | 0.990 | 5.602  |
| Quasi-model 27 | 0.013 | 4.052 | 1.276 | 0.057 | 16.367 | 0.988 | 1.754  |
| Quasi-model 28 | 0.010 | 2.370 | 1.139 | 0.275 | 20.511 | 0.990 | 1.352  |
| Quasi-model 29 | 0.016 | 2.819 | 1.005 | 0.119 | 9.349  | 0.989 | 5.352  |
| Quasi-model 30 | 0.011 | 4.456 | 1.589 | 0.174 | 19.170 | 0.988 | 4.812  |

**Supplementary table S5: Performance of the quasi-models for Subject 4**

*Model #1: One compartment, no covariate*

| <b>Model</b>   | <b>K</b> | <b>V</b> | <b>R<sup>2</sup></b> | <b>MSE</b> |
|----------------|----------|----------|----------------------|------------|
| Pop-PK, NPAG   | 0.272    | 26.650   | 0.984                | 36.060     |
| Pop-PK, MAP    | 0.273    | 26.255   | 0.939                | 101.22     |
| Quasi-model 1  | 0.268    | 28.396   | 0.938                | 71.117     |
| Quasi-model 2  | 0.259    | 32.883   | 0.937                | 304.078    |
| Quasi-model 3  | 0.279    | 26.564   | 0.940                | 131.192    |
| Quasi-model 4  | 0.271    | 28.638   | 0.939                | 118.108    |
| Quasi-model 5  | 0.286    | 26.488   | 0.941                | 91.942     |
| Quasi-model 6  | 0.276    | 29.649   | 0.939                | 238.243    |
| Quasi-model 7  | 0.273    | 28.075   | 0.939                | 159.972    |
| Quasi-model 8  | 0.283    | 28.618   | 0.940                | 109.114    |
| Quasi-model 9  | 0.266    | 29.921   | 0.939                | 157.863    |
| Quasi-model 10 | 0.276    | 29.716   | 0.939                | 193.094    |
| Quasi-model 11 | 0.276    | 28.866   | 0.940                | 87.607     |
| Quasi-model 12 | 0.272    | 27.526   | 0.938                | 71.739     |
| Quasi-model 13 | 0.284    | 25.140   | 0.939                | 72.167     |
| Quasi-model 14 | 0.267    | 28.829   | 0.939                | 78.059     |
| Quasi-model 15 | 0.290    | 27.995   | 0.941                | 116.547    |
| Quasi-model 16 | 0.266    | 27.716   | 0.938                | 77.563     |
| Quasi-model 17 | 0.268    | 30.310   | 0.938                | 244.136    |
| Quasi-model 18 | 0.290    | 29.988   | 0.940                | 110.571    |
| Quasi-model 19 | 0.254    | 28.255   | 0.937                | 129.064    |
| Quasi-model 20 | 0.284    | 27.348   | 0.941                | 66.147     |
| Quasi-model 21 | 0.290    | 29.618   | 0.940                | 177.571    |
| Quasi-model 22 | 0.270    | 27.571   | 0.939                | 75.959     |
| Quasi-model 23 | 0.268    | 26.334   | 0.939                | 200.753    |
| Quasi-model 24 | 0.261    | 30.449   | 0.939                | 257.478    |
| Quasi-model 25 | 0.271    | 30.019   | 0.939                | 120.036    |
| Quasi-model 26 | 0.278    | 30.482   | 0.939                | 208.885    |
| Quasi-model 27 | 0.272    | 26.544   | 0.939                | 87.027     |
| Quasi-model 28 | 0.269    | 28.143   | 0.939                | 80.276     |
| Quasi-model 29 | 0.288    | 28.909   | 0.941                | 193.378    |
| Quasi-model 30 | 0.281    | 25.781   | 0.940                | 199.467    |

*Model #2: Two compartments, no covariate*

| <b>Model</b>   | <b>K</b> | <b>KCP</b> | <b>KPC</b> | <b>V</b> | <b>R<sup>2</sup></b> | <b>MSE</b> |
|----------------|----------|------------|------------|----------|----------------------|------------|
| Pop-PK, NPAG   | 0.428    | 0.966      | 0.867      | 12.95    | 1.000                | 1.116      |
| Pop-PK, MAP    | 0.454    | 1.838      | 1.411      | 11.060   | 0.994                | 1434.563   |
| Bayesian       |          |            |            |          |                      |            |
| Quasi-model 1  | 0.521    | 3.837      | 2.134      | 9.934    | 0.997                | 177.345    |
| Quasi-model 2  | 0.469    | 2.156      | 1.362      | 10.780   | 0.994                | 33.283     |
| Quasi-model 3  | 0.573    | 3.975      | 2.836      | 11.512   | 0.987                | 288.82     |
| Quasi-model 4  | 0.482    | 2.787      | 2.545      | 15.576   | 0.992                | 42.556     |
| Quasi-model 5  | 0.497    | 1.594      | 1.562      | 14.041   | 0.993                | 20.523     |
| Quasi-model 6  | 0.442    | 1.379      | 1.564      | 14.871   | 0.989                | 22.169     |
| Quasi-model 7  | 0.416    | 1.212      | 1.104      | 13.371   | 0.994                | 70.384     |
| Quasi-model 8  | 0.591    | 2.951      | 1.275      | 13.543   | 0.998                | 360.764    |
| Quasi-model 9  | 0.374    | 1.341      | 1.455      | 13.190   | 0.992                | 629.852    |
| Quasi-model 10 | 0.472    | 2.282      | 2.646      | 16.211   | 0.990                | 398.170    |
| Quasi-model 11 | 0.385    | 1.923      | 2.316      | 16.546   | 0.978                | 334.610    |
| Quasi-model 12 | 0.700    | 2.982      | 1.082      | 10.238   | 0.998                | 36.567     |
| Quasi-model 13 | 0.483    | 2.925      | 3.223      | 13.230   | 0.986                | 70.965     |
| Quasi-model 14 | 0.357    | 2.141      | 1.575      | 14.042   | 0.995                | 42.072     |
| Quasi-model 15 | 0.57     | 2.738      | 1.736      | 12.755   | 0.992                | 20.030     |
| Quasi-model 16 | 0.521    | 2.088      | 1.551      | 12.001   | 0.996                | 47.791     |
| Quasi-model 17 | 0.567    | 3.100      | 1.545      | 10.167   | 0.995                | 9.096      |
| Quasi-model 18 | 0.530    | 3.985      | 2.831      | 11.489   | 0.992                | 138.501    |
| Quasi-model 19 | 0.481    | 2.564      | 2.569      | 15.567   | 0.987                | 23.439     |
| Quasi-model 20 | 0.498    | 1.582      | 1.556      | 14.054   | 0.994                | 23.695     |
| Quasi-model 21 | 0.439    | 1.380      | 1.565      | 14.875   | 0.989                | 20.764     |
| Quasi-model 22 | 0.416    | 1.206      | 1.116      | 13.266   | 0.994                | 79.353     |
| Quasi-model 23 | 0.591    | 3.264      | 1.288      | 13.546   | 0.998                | 373.423    |
| Quasi-model 24 | 0.404    | 1.506      | 1.685      | 14.967   | 0.990                | 268.341    |
| Quasi-model 25 | 0.471    | 2.295      | 2.639      | 13.750   | 0.989                | 157.614    |
| Quasi-model 26 | 0.430    | 1.715      | 2.192      | 15.047   | 0.985                | 86.466     |
| Quasi-model 27 | 0.425    | 3.098      | 3.314      | 14.478   | 0.977                | 65.843     |
| Quasi-model 28 | 0.238    | 0.572      | 0.488      | 19.163   | 0.990                | 72.704     |
| Quasi-model 29 | 0.404    | 2.113      | 2.171      | 11.990   | 0.989                | 81.648     |
| Quasi-model 30 | 0.488    | 1.768      | 1.039      | 12.580   | 0.997                | 128.298    |

Model #3: One compartment, covariate: creatinine clearance

| <b>Model</b>  | <b>KS</b> | <b>KI</b> | <b>V<sub>c</sub></b> | <b>R<sup>2</sup></b> | <b>MSE</b> |
|---------------|-----------|-----------|----------------------|----------------------|------------|
| Pop-PK, NPAG  | 0.003     | 0.027     | 26.375               | 0.984                | 35.757     |
| Pop-PK, MAP   |           |           |                      |                      |            |
| Bayesian      | 0.003     | 0.027     | 26.225               | 0.939                | 100.592    |
| Quasi-model 1 | 0.003     | 0.060     | 28.983               | 0.939                | 89.518     |
| Quasi-model 2 | 0.002     | 0.048     | 27.770               | 0.941                | 110.379    |
| Quasi-model 3 | 0.003     | 0.059     | 27.318               | 0.940                | 67.853     |
| Quasi-model 4 | 0.003     | 0.045     | 26.135               | 0.940                | 82.869     |
| Quasi-model 5 | 0.003     | 0.074     | 26.643               | 0.941                | 76.017     |
| Quasi-model 6 | 0.003     | 0.081     | 27.027               | 0.941                | 65.318     |
| Quasi-model 7 | 0.003     | 0.034     | 28.422               | 0.939                | 84.036     |

|                |       |       |        |       |         |
|----------------|-------|-------|--------|-------|---------|
| Quasi-model 8  | 0.003 | 0.023 | 29.055 | 0.940 | 152.749 |
| Quasi-model 9  | 0.003 | 0.045 | 27.216 | 0.938 | 72.328  |
| Quasi-model 10 | 0.003 | 0.048 | 27.513 | 0.940 | 107.703 |
| Quasi-model 11 | 0.003 | 0.046 | 27.307 | 0.940 | 100.119 |
| Quasi-model 12 | 0.003 | 0.054 | 30.371 | 0.940 | 109.210 |
| Quasi-model 13 | 0.003 | 0.044 | 27.892 | 0.940 | 101.274 |
| Quasi-model 14 | 0.003 | 0.901 | 30.312 | 0.939 | 198.963 |
| Quasi-model 15 | 0.003 | 0.058 | 28.544 | 0.940 | 167.230 |
| Quasi-model 16 | 0.003 | 0.043 | 30.074 | 0.938 | 159.524 |
| Quasi-model 17 | 0.003 | 0.047 | 27.757 | 0.939 | 84.826  |
| Quasi-model 18 | 0.003 | 0.069 | 27.877 | 0.940 | 100.184 |
| Quasi-model 19 | 0.003 | 0.062 | 26.170 | 0.939 | 72.858  |
| Quasi-model 20 | 0.003 | 0.053 | 25.835 | 0.941 | 68.281  |
| Quasi-model 21 | 0.002 | 0.098 | 28.958 | 0.939 | 124.591 |
| Quasi-model 22 | 0.003 | 0.034 | 28.909 | 0.940 | 67.671  |
| Quasi-model 23 | 0.003 | 0.061 | 27.912 | 0.940 | 102.970 |
| Quasi-model 24 | 0.003 | 0.058 | 28.854 | 0.939 | 106.295 |
| Quasi-model 25 | 0.003 | 0.075 | 31.053 | 0.938 | 262.235 |
| Quasi-model 26 | 0.003 | 0.043 | 28.190 | 0.940 | 72.171  |
| Quasi-model 27 | 0.003 | 0.070 | 27.356 | 0.939 | 69.345  |
| Quasi-model 28 | 0.003 | 0.058 | 29.637 | 0.939 | 133.678 |
| Quasi-model 29 | 0.003 | 0.037 | 29.374 | 0.940 | 109.575 |
| Quasi-model 30 | 0.003 | 0.077 | 28.309 | 0.940 | 73.815  |

*Model #4: Two compartments, covariate: creatinine clearance*

| <b>Model</b>   | <b>KS</b> | <b>KCP</b> | <b>KPC</b> | <b>KI</b> | <b>V<sub>c</sub></b> | <b>R<sup>2</sup></b> | <b>MSE</b> |
|----------------|-----------|------------|------------|-----------|----------------------|----------------------|------------|
| Pop-PK, NPAG   | 0.009     | 2.375      | 1.041      | 0.180     | 6.900                | 0.999                | 2.772      |
| Pop-PK, MAP    |           |            |            |           |                      |                      |            |
| Bayesian       | 0.007     | 4.395      | 1.146      | 0.200     | 6.313                | 0.990                | 151.068    |
| Quasi-model 1  | 0.008     | 4.850      | 3.155      | 0.170     | 9.067                | 0.991                | 345.149    |
| Quasi-model 2  | 0.006     | 3.193      | 1.981      | 0.237     | 12.751               | 0.993                | 57.430     |
| Quasi-model 3  | 0.003     | 3.625      | 3.504      | 0.153     | 13.221               | 0.975                | 220.867    |
| Quasi-model 4  | 0.003     | 2.736      | 2.239      | 0.286     | 10.268               | 0.994                | 274.017    |
| Quasi-model 5  | 0.003     | 3.052      | 2.152      | 0.095     | 15.211               | 0.987                | 149.965    |
| Quasi-model 6  | 0.004     | 3.240      | 2.019      | 0.241     | 13.120               | 0.990                | 48.408     |
| Quasi-model 7  | 0.004     | 1.491      | 1.238      | 0.207     | 12.191               | 0.996                | 34.988     |
| Quasi-model 8  | 0.009     | 3.001      | 1.590      | 0.013     | 10.470               | 0.997                | 56.405     |
| Quasi-model 9  | 0.004     | 3.87       | 2.486      | 0.181     | 11.023               | 0.986                | 124.68     |
| Quasi-model 10 | 0.005     | 1.915      | 1.847      | 0.053     | 13.444               | 0.990                | 31.199     |
| Quasi-model 11 | 0.007     | 3.925      | 1.988      | 0.177     | 10.810               | 0.996                | 13.452     |
| Quasi-model 12 | 0.001     | 1.166      | 1.553      | 0.306     | 15.882               | 0.986                | 20.044     |
| Quasi-model 13 | 0.002     | 2.771      | 3.591      | 0.247     | 13.760               | 0.977                | 175.738    |
| Quasi-model 14 | 0.004     | 2.335      | 2.550      | 0.145     | 14.835               | 0.988                | 22.226     |
| Quasi-model 15 | 0.003     | 2.893      | 2.795      | 0.218     | 14.892               | 0.981                | 56.153     |
| Quasi-model 16 | 0.004     | 2.071      | 1.861      | 0.144     | 12.190               | 0.989                | 288.210    |
| Quasi-model 17 | 0.004     | 2.154      | 1.887      | 0.128     | 12.560               | 0.992                | 81.225     |
| Quasi-model 18 | 0.004     | 1.871      | 2.371      | 0.178     | 16.418               | 0.984                | 59.429     |

|                |       |       |       |       |        |       |         |
|----------------|-------|-------|-------|-------|--------|-------|---------|
| Quasi-model 19 | 0.003 | 1.077 | 1.236 | 0.142 | 13.470 | 0.988 | 860.981 |
| Quasi-model 20 | 0.006 | 3.507 | 2.315 | 0.166 | 10.295 | 0.996 | 84.763  |
| Quasi-model 21 | 0.006 | 4.105 | 2.300 | 0.073 | 10.827 | 0.991 | 405.058 |
| Quasi-model 22 | 0.003 | 1.636 | 2.011 | 0.190 | 14.451 | 0.988 | 290.924 |
| Quasi-model 23 | 0.006 | 2.749 | 1.657 | 0.124 | 9.723  | 0.995 | 45.009  |
| Quasi-model 24 | 0.004 | 1.136 | 0.903 | 0.144 | 15.660 | 0.994 | 276.014 |
| Quasi-model 25 | 0.004 | 1.350 | 1.659 | 0.207 | 17.544 | 0.991 | 15.733  |
| Quasi-model 26 | 0.005 | 2.588 | 1.601 | 0.113 | 11.186 | 0.997 | 98.008  |
| Quasi-model 27 | 0.004 | 2.264 | 1.778 | 0.055 | 13.148 | 0.992 | 72.788  |
| Quasi-model 28 | 0.007 | 4.541 | 2.238 | 0.205 | 10.722 | 0.995 | 20.486  |
| Quasi-model 29 | 0.003 | 4.686 | 5.265 | 0.222 | 13.625 | 0.979 | 363.393 |
| Quasi-model 30 | 0.002 | 1.233 | 1.271 | 0.260 | 15.320 | 0.993 | 20.060  |

**Supplementary table S6: Performance of the quasi-models for Subject 5**

*Model #1: One compartment, no covariate*

| <b>Model</b>   | <b>K</b> | <b>V</b> | <b>R<sup>2</sup></b> | <b>MSE</b> |
|----------------|----------|----------|----------------------|------------|
| Pop-PK, NPAG   | 0.272    | 37.450   | 0.991                | 13.523     |
| Pop-PK, MAP    | 0.276    | 37.093   | 0.982                | 13.386     |
| Quasi-model 1  | 0.241    | 43.447   | 0.98                 | 31.829     |
| Quasi-model 2  | 0.259    | 40.664   | 0.981                | 27.391     |
| Quasi-model 3  | 0.261    | 41.444   | 0.981                | 42.235     |
| Quasi-model 4  | 0.278    | 38.216   | 0.982                | 28.478     |
| Quasi-model 5  | 0.284    | 34.600   | 0.982                | 19.969     |
| Quasi-model 6  | 0.329    | 31.392   | 0.984                | 39.915     |
| Quasi-model 7  | 0.324    | 31.560   | 0.984                | 22.123     |
| Quasi-model 8  | 0.289    | 35.061   | 0.982                | 15.065     |
| Quasi-model 9  | 0.247    | 43.113   | 0.981                | 14.631     |
| Quasi-model 10 | 0.269    | 38.894   | 0.982                | 18.737     |
| Quasi-model 11 | 0.256    | 38.088   | 0.98                 | 50.876     |
| Quasi-model 12 | 0.266    | 38.270   | 0.981                | 14.362     |
| Quasi-model 13 | 0.305    | 34.536   | 0.983                | 29.327     |
| Quasi-model 14 | 0.265    | 38.734   | 0.981                | 15.066     |
| Quasi-model 15 | 0.229    | 45.445   | 0.979                | 33.753     |
| Quasi-model 16 | 0.312    | 32.763   | 0.984                | 23.709     |
| Quasi-model 17 | 0.301    | 32.309   | 0.983                | 64.636     |
| Quasi-model 18 | 0.267    | 38.728   | 0.981                | 15.632     |
| Quasi-model 19 | 0.288    | 35.495   | 0.982                | 14.644     |
| Quasi-model 20 | 0.749    | 99.849   | 0.979                | 67.223     |
| Quasi-model 21 | 0.262    | 39.629   | 0.981                | 16.207     |
| Quasi-model 22 | 0.301    | 32.341   | 0.983                | 66.004     |
| Quasi-model 23 | 0.288    | 35.491   | 0.982                | 14.49      |
| Quasi-model 24 | 0.284    | 36.943   | 0.982                | 20.465     |
| Quasi-model 25 | 0.243    | 41.753   | 0.98                 | 24.581     |
| Quasi-model 26 | 0.254    | 39.814   | 0.981                | 17.548     |
| Quasi-model 27 | 0.324    | 31.506   | 0.984                | 27.805     |
| Quasi-model 28 | 0.315    | 32.308   | 0.983                | 19.241     |

|                |       |        |       |        |
|----------------|-------|--------|-------|--------|
| Quasi-model 29 | 0.268 | 38.342 | 0.981 | 14.681 |
| Quasi-model 30 | 0.290 | 33.477 | 0.982 | 15.012 |

Model #2: Two compartments, no covariate

| Model          | K     | KCP   | KPC   | V      | R <sup>2</sup> | MSE     |
|----------------|-------|-------|-------|--------|----------------|---------|
| Pop-PK, NPAG   | 0.748 | 1.906 | 1.065 | 12.05  | 0.998          | 2.196   |
| Pop-PK, MAP    | 0.745 | 1.883 | 1.085 | 12.039 | 0.995          | 3.557   |
| Bayesian       |       |       |       |        |                |         |
| Quasi-model 1  | 0.669 | 3.668 | 2.097 | 15.963 | 0.989          | 30.629  |
| Quasi-model 2  | 0.699 | 3.868 | 2.486 | 14.215 | 0.987          | 20.513  |
| Quasi-model 3  | 0.541 | 1.030 | 0.887 | 17.357 | 0.993          | 6.822   |
| Quasi-model 4  | 0.528 | 2.781 | 3.245 | 16.751 | 0.989          | 23.12   |
| Quasi-model 5  | 0.588 | 3.138 | 2.501 | 17.421 | 0.986          | 32.766  |
| Quasi-model 6  | 0.444 | 2.315 | 4.044 | 22.292 | 0.99           | 23.108  |
| Quasi-model 7  | 0.486 | 1.759 | 2.140 | 19.214 | 0.987          | 27.305  |
| Quasi-model 8  | 0.441 | 2.503 | 3.603 | 22.292 | 0.987          | 12.049  |
| Quasi-model 9  | 0.449 | 3.103 | 4.774 | 24.328 | 0.983          | 112.095 |
| Quasi-model 10 | 0.641 | 2.819 | 1.540 | 15.505 | 0.993          | 55.511  |
| Quasi-model 11 | 0.404 | 2.184 | 3.410 | 24.322 | 0.986          | 22.510  |
| Quasi-model 12 | 0.741 | 2.478 | 1.496 | 12.377 | 0.995          | 8.027   |
| Quasi-model 13 | 0.741 | 3.689 | 2.290 | 13.420 | 0.990          | 39.204  |
| Quasi-model 14 | 0.339 | 0.756 | 2.208 | 29.366 | 0.987          | 21.405  |
| Quasi-model 15 | 0.492 | 2.588 | 3.288 | 18.893 | 0.987          | 16.103  |
| Quasi-model 16 | 0.712 | 3.658 | 2.099 | 14.718 | 0.989          | 23.919  |
| Quasi-model 17 | 0.688 | 3.977 | 2.495 | 14.270 | 0.985          | 15.565  |
| Quasi-model 18 | 0.508 | 1.743 | 2.501 | 19.080 | 0.992          | 5.975   |
| Quasi-model 19 | 0.574 | 2.920 | 3.252 | 19.226 | 0.989          | 14.742  |
| Quasi-model 20 | 0.587 | 3.130 | 2.497 | 17.429 | 0.986          | 37.192  |
| Quasi-model 21 | 0.441 | 2.313 | 4.044 | 22.297 | 0.990          | 21.123  |
| Quasi-model 22 | 0.485 | 1.748 | 2.143 | 19.283 | 0.987          | 15.108  |
| Quasi-model 23 | 0.44  | 2.503 | 3.589 | 22.298 | 0.987          | 12.468  |
| Quasi-model 24 | 0.451 | 3.621 | 3.768 | 24.286 | 0.983          | 138.902 |
| Quasi-model 25 | 0.639 | 2.826 | 1.569 | 15.546 | 0.992          | 58.993  |
| Quasi-model 26 | 0.430 | 0.675 | 0.779 | 21.874 | 0.993          | 5.292   |
| Quasi-model 27 | 0.479 | 3.377 | 3.128 | 21.261 | 0.985          | 83.252  |
| Quasi-model 28 | 0.477 | 2.018 | 1.840 | 21.648 | 0.990          | 56.173  |
| Quasi-model 29 | 0.545 | 4.333 | 4.057 | 19.156 | 0.984          | 52.471  |
| Quasi-model 30 | 0.506 | 2.158 | 2.106 | 20.049 | 0.988          | 37.232  |

Model #3: One compartment, covariate: creatinine clearance

| Model         | KS    | KI    | V <sub>c</sub> | R <sup>2</sup> | MSE    |
|---------------|-------|-------|----------------|----------------|--------|
| Pop-PK, NPAG  | 0.004 | 0.096 | 36.775         | 0.991          | 13.498 |
| Pop-PK, MAP   |       |       |                |                |        |
| Bayesian      | 0.004 | 0.096 | 36.503         | 0.982          | 13.435 |
| Quasi-model 1 | 0.004 | 0.084 | 36.695         | 0.982          | 13.509 |
| Quasi-model 2 | 0.004 | 0.087 | 35.247         | 0.982          | 14.299 |



|                |       |       |        |       |        |
|----------------|-------|-------|--------|-------|--------|
| Quasi-model 3  | 0.004 | 0.070 | 40.651 | 0.981 | 15.377 |
| Quasi-model 4  | 0.003 | 0.098 | 43.134 | 0.980 | 24.080 |
| Quasi-model 5  | 0.005 | 0.049 | 36.791 | 0.982 | 13.593 |
| Quasi-model 6  | 0.004 | 0.082 | 34.268 | 0.982 | 15.006 |
| Quasi-model 7  | 0.005 | 0.018 | 35.899 | 0.982 | 14.365 |
| Quasi-model 8  | 0.005 | 0.055 | 35.445 | 0.982 | 13.305 |
| Quasi-model 9  | 0.004 | 0.082 | 37.044 | 0.982 | 13.484 |
| Quasi-model 10 | 0.005 | 0.041 | 36.854 | 0.982 | 16.240 |
| Quasi-model 11 | 0.004 | 0.074 | 37.402 | 0.982 | 14.896 |
| Quasi-model 12 | 0.004 | 0.184 | 39.915 | 0.981 | 15.866 |
| Quasi-model 13 | 0.005 | 0.021 | 36.651 | 0.982 | 13.346 |
| Quasi-model 14 | 0.004 | 0.031 | 39.164 | 0.981 | 14.009 |
| Quasi-model 15 | 0.005 | 0.020 | 39.394 | 0.981 | 18.806 |
| Quasi-model 16 | 0.005 | 0.027 | 35.886 | 0.982 | 13.737 |
| Quasi-model 17 | 0.005 | 0.071 | 35.592 | 0.982 | 14.921 |
| Quasi-model 18 | 0.005 | 0.032 | 34.675 | 0.983 | 16.370 |
| Quasi-model 19 | 0.005 | 0.048 | 38.372 | 0.981 | 14.578 |
| Quasi-model 20 | 0.003 | 0.097 | 38.685 | 0.981 | 13.920 |
| Quasi-model 21 | 0.005 | 0.053 | 34.847 | 0.983 | 15.383 |
| Quasi-model 22 | 0.003 | 0.087 | 36.639 | 0.981 | 15.840 |
| Quasi-model 23 | 0.004 | 0.061 | 39.344 | 0.981 | 21.607 |
| Quasi-model 24 | 0.005 | 0.020 | 37.724 | 0.982 | 13.555 |
| Quasi-model 25 | 0.004 | 0.062 | 35.741 | 0.982 | 19.907 |
| Quasi-model 26 | 0.004 | 0.098 | 37.213 | 0.982 | 13.477 |
| Quasi-model 27 | 0.005 | 0.036 | 37.307 | 0.982 | 13.516 |
| Quasi-model 28 | 0.004 | 0.067 | 38.411 | 0.981 | 14.572 |
| Quasi-model 29 | 0.003 | 0.092 | 41.728 | 0.980 | 23.205 |
| Quasi-model 30 | 0.005 | 0.007 | 40.736 | 0.981 | 27.077 |

*Model #4: Two compartments, covariate: creatinine clearance*

| <b>Model</b>   | <b>KS</b> | <b>KCP</b> | <b>KPC</b> | <b>KI</b> | <b>V<sub>c</sub></b> | <b>R<sup>2</sup></b> | <b>MSE</b> |
|----------------|-----------|------------|------------|-----------|----------------------|----------------------|------------|
| Pop-PK, NPAG   | 0.014     | 2.375      | 1.099      | 0.212     | 9.900                | 0.998                | 3.321      |
| Pop-PK, MAP    |           |            |            |           |                      |                      |            |
| Bayesian       | 0.014     | 2.385      | 1.093      | 0.211     | 9.827                | 0.995                | 4.272      |
| Quasi-model 1  | 0.007     | 2.790      | 3.097      | 0.226     | 18.247               | 0.985                | 79.112     |
| Quasi-model 2  | 0.009     | 3.135      | 2.703      | 0.175     | 18.023               | 0.989                | 10.961     |
| Quasi-model 3  | 0.007     | 3.958      | 3.443      | 0.145     | 21.966               | 0.983                | 20.953     |
| Quasi-model 4  | 0.008     | 2.830      | 2.814      | 0.227     | 20.188               | 0.993                | 5.968      |
| Quasi-model 5  | 0.010     | 3.666      | 2.051      | 0.124     | 15.751               | 0.99                 | 31.248     |
| Quasi-model 6  | 0.010     | 5.048      | 3.13       | 0.139     | 15.351               | 0.985                | 39.013     |
| Quasi-model 7  | 0.007     | 4.226      | 4.101      | 0.162     | 20.614               | 0.986                | 16.744     |
| Quasi-model 8  | 0.003     | 2.473      | 2.384      | 0.335     | 19.038               | 0.985                | 15.612     |
| Quasi-model 9  | 0.011     | 3.813      | 2.063      | 0.106     | 16.476               | 0.987                | 23.050     |
| Quasi-model 10 | 0.006     | 4.108      | 2.567      | 0.307     | 17.584               | 0.985                | 21.175     |
| Quasi-model 11 | 0.008     | 2.031      | 1.995      | 0.118     | 18.710               | 0.988                | 38.798     |
| Quasi-model 12 | 0.011     | 4.195      | 2.804      | 0.166     | 15.762               | 0.968                | 11.775     |
| Quasi-model 13 | 0.008     | 3.596      | 2.368      | 0.185     | 17.477               | 0.989                | 17.494     |

|                |       |       |       |       |        |       |        |
|----------------|-------|-------|-------|-------|--------|-------|--------|
| Quasi-model 14 | 0.008 | 4.757 | 4.276 | 0.123 | 21.208 | 0.982 | 119.62 |
| Quasi-model 15 | 0.009 | 3.714 | 2.115 | 0.096 | 15.053 | 0.989 | 40.202 |
| Quasi-model 16 | 0.004 | 1.338 | 1.685 | 0.294 | 19.241 | 0.989 | 15.409 |
| Quasi-model 17 | 0.008 | 4.426 | 3.943 | 0.150 | 17.987 | 0.986 | 41.253 |
| Quasi-model 18 | 0.007 | 2.627 | 2.739 | 0.121 | 18.818 | 0.986 | 94.956 |
| Quasi-model 19 | 0.005 | 2.994 | 3.475 | 0.238 | 21.165 | 0.985 | 36.229 |
| Quasi-model 20 | 0.013 | 3.634 | 1.862 | 0.207 | 12.597 | 0.990 | 19.157 |
| Quasi-model 21 | 0.007 | 3.963 | 3.236 | 0.122 | 20.111 | 0.988 | 19.966 |
| Quasi-model 22 | 0.008 | 4.932 | 3.952 | 0.152 | 16.173 | 0.985 | 27.756 |
| Quasi-model 23 | 0.008 | 2.742 | 3.267 | 0.217 | 22.360 | 0.984 | 31.997 |
| Quasi-model 24 | 0.012 | 3.120 | 2.391 | 0.159 | 13.294 | 0.990 | 62.133 |
| Quasi-model 25 | 0.006 | 3.556 | 4.105 | 0.269 | 19.596 | 0.985 | 15.464 |
| Quasi-model 26 | 0.010 | 4.536 | 3.064 | 0.178 | 14.088 | 0.985 | 24.234 |
| Quasi-model 27 | 0.009 | 4.008 | 2.690 | 0.225 | 15.683 | 0.986 | 21.684 |
| Quasi-model 28 | 0.005 | 3.783 | 2.200 | 0.235 | 19.356 | 0.988 | 28.555 |
| Quasi-model 29 | 0.007 | 2.814 | 1.487 | 0.296 | 14.979 | 0.990 | 20.875 |
| Quasi-model 30 | 0.007 | 3.782 | 3.227 | 0.260 | 18.919 | 0.986 | 13.797 |

**Supplementary table S7: Performance of the quasi-models for Subject 6**

*Model #1: One compartment, no covariate*

| <b>Model</b>   | <b>K</b> | <b>V</b> | <b>R<sup>2</sup></b> | <b>MSE</b> |
|----------------|----------|----------|----------------------|------------|
| Pop-PK, NPAG   | 0.129    | 38.35    | 0.968                | 45.317     |
| Pop-PK, MAP    | 0.128    | 38.538   | 0.935                | 48.281     |
| Quasi-model 1  | 0.122    | 39.807   | 0.936                | 49.163     |
| Quasi-model 2  | 0.107    | 46.602   | 0.936                | 225.889    |
| Quasi-model 3  | 0.118    | 40.116   | 0.936                | 69.622     |
| Quasi-model 4  | 0.121    | 41.008   | 0.936                | 79.005     |
| Quasi-model 5  | 0.156    | 32.727   | 0.934                | 72.591     |
| Quasi-model 6  | 0.105    | 46.462   | 0.936                | 104.960    |
| Quasi-model 7  | 0.152    | 33.333   | 0.935                | 67.003     |
| Quasi-model 8  | 0.187    | 29.076   | 0.933                | 252.746    |
| Quasi-model 9  | 0.136    | 35.951   | 0.935                | 64.245     |
| Quasi-model 10 | 0.145    | 35.439   | 0.935                | 63.187     |
| Quasi-model 11 | 0.180    | 27.586   | 0.933                | 211.478    |
| Quasi-model 12 | 0.143    | 36.112   | 0.935                | 127.302    |
| Quasi-model 13 | 0.120    | 43.737   | 0.936                | 342.101    |
| Quasi-model 14 | 0.139    | 36.451   | 0.935                | 72.985     |
| Quasi-model 15 | 0.150    | 34.486   | 0.935                | 73.008     |
| Quasi-model 16 | 0.180    | 28.182   | 0.933                | 140.035    |
| Quasi-model 17 | 0.162    | 31.848   | 0.934                | 104.782    |
| Quasi-model 18 | 0.122    | 40.115   | 0.936                | 51.145     |
| Quasi-model 19 | 0.121    | 41.193   | 0.935                | 70.073     |
| Quasi-model 20 | 0.121    | 37.553   | 0.936                | 249.717    |
| Quasi-model 21 | 0.146    | 36.418   | 0.935                | 272.057    |
| Quasi-model 22 | 0.131    | 40.000   | 0.935                | 63.023     |

|                |       |        |       |         |
|----------------|-------|--------|-------|---------|
| Quasi-model 23 | 0.130 | 37.117 | 0.936 | 50.216  |
| Quasi-model 24 | 0.178 | 28.729 | 0.934 | 118.164 |
| Quasi-model 25 | 0.106 | 46.060 | 0.936 | 99.051  |
| Quasi-model 26 | 0.157 | 31.458 | 0.934 | 153.182 |
| Quasi-model 27 | 0.143 | 34.687 | 0.935 | 67.861  |
| Quasi-model 28 | 0.128 | 38.951 | 0.935 | 64.144  |
| Quasi-model 29 | 0.139 | 37.007 | 0.935 | 88.566  |
| Quasi-model 30 | 0.130 | 36.494 | 0.935 | 209.178 |

Model #2: Two compartments, no covariate

| <b>Model</b>            | <b>K</b> | <b>KCP</b> | <b>KPC</b> | <b>V</b> | <b>R<sup>2</sup></b> | <b>MSE</b> |
|-------------------------|----------|------------|------------|----------|----------------------|------------|
| Pop-PK, NPAG            | 0.204    | 2.500      | 4.777      | 24.050   | 0.968                | 45.728     |
| Pop-PK, MAP<br>Bayesian | 0.204    | 2.504      | 4.792      | 24.042   | 0.936                | 50.773     |
| Quasi-model 1           | 0.319    | 2.205      | 2.288      | 16.035   | 0.937                | 158.016    |
| Quasi-model 2           | 0.470    | 2.164      | 1.283      | 9.843    | 0.935                | 94.458     |
| Quasi-model 3           | 0.254    | 2.963      | 4.266      | 20.309   | 0.937                | 52.552     |
| Quasi-model 4           | 0.222    | 2.066      | 4.341      | 23.369   | 0.936                | 118.055    |
| Quasi-model 5           | 0.211    | 3.053      | 2.863      | 21.910   | 0.938                | 75.657     |
| Quasi-model 6           | 0.160    | 1.053      | 4.175      | 31.169   | 0.937                | 47.349     |
| Quasi-model 7           | 0.318    | 3.697      | 2.256      | 15.966   | 0.938                | 60.548     |
| Quasi-model 8           | 0.233    | 2.392      | 3.842      | 21.913   | 0.937                | 81.124     |
| Quasi-model 9           | 0.331    | 2.346      | 3.207      | 14.015   | 0.937                | 173.002    |
| Quasi-model 10          | 0.193    | 2.331      | 0.547      | 27.863   | 0.931                | 51.615     |
| Quasi-model 11          | 0.159    | 0.498      | 3.013      | 31.341   | 0.937                | 54.124     |
| Quasi-model 12          | 0.271    | 2.665      | 2.715      | 17.946   | 0.937                | 46.657     |
| Quasi-model 13          | 0.251    | 3.215      | 3.161      | 20.182   | 0.936                | 57.740     |
| Quasi-model 14          | 0.345    | 3.680      | 2.689      | 15.664   | 0.938                | 187.323    |
| Quasi-model 15          | 0.346    | 1.844      | 1.740      | 13.854   | 0.936                | 158.478    |
| Quasi-model 16          | 0.334    | 4.509      | 3.126      | 14.924   | 0.937                | 95.392     |
| Quasi-model 17          | 0.351    | 3.524      | 1.799      | 14.176   | 0.937                | 82.048     |
| Quasi-model 18          | 0.463    | 4.270      | 1.810      | 10.148   | 0.939                | 60.628     |
| Quasi-model 19          | 0.252    | 3.788      | 4.421      | 19.438   | 0.936                | 47.772     |
| Quasi-model 20          | 0.211    | 3.073      | 2.858      | 21.918   | 0.938                | 67.938     |
| Quasi-model 21          | 0.158    | 1.054      | 4.177      | 31.162   | 0.937                | 48.389     |
| Quasi-model 22          | 0.223    | 2.695      | 3.755      | 21.738   | 0.937                | 48.326     |
| Quasi-model 23          | 0.233    | 2.392      | 3.855      | 21.912   | 0.937                | 83.004     |
| Quasi-model 24          | 0.331    | 2.345      | 3.227      | 14.015   | 0.937                | 172.843    |
| Quasi-model 25          | 0.146    | 0.380      | 0.507      | 29.240   | 0.923                | 56.522     |
| Quasi-model 26          | 0.236    | 1.734      | 1.612      | 19.422   | 0.938                | 63.684     |
| Quasi-model 27          | 0.287    | 2.691      | 3.072      | 17.894   | 0.937                | 126.656    |
| Quasi-model 28          | 0.213    | 1.097      | 2.150      | 23.413   | 0.936                | 73.842     |
| Quasi-model 29          | 0.194    | 2.527      | 3.025      | 25.023   | 0.938                | 73.125     |
| Quasi-model 30          | 0.346    | 4.603      | 3.014      | 14.055   | 0.936                | 172.926    |

Model #3: One compartment, covariate: creatinine clearance

| <b>Model</b>   | <b>KS</b> | <b>KI</b> | <b>V<sub>c</sub></b> | <b>R<sup>2</sup></b> | <b>MSE</b> |
|----------------|-----------|-----------|----------------------|----------------------|------------|
| Pop-PK, NPAG   | 0.004     | 0.017     | 36.798               | 0.968                | 47.115     |
| Pop-PK, MAP    |           |           |                      |                      |            |
| Bayesian       | 0.004     | 0.017     | 36.769               | 0.935                | 48.476     |
| Quasi-model 1  | 0.003     | 0.04      | 39.952               | 0.935                | 48.594     |
| Quasi-model 2  | 0.002     | 0.067     | 37.622               | 0.935                | 47.667     |
| Quasi-model 3  | 0.005     | 0.012     | 36.878               | 0.935                | 48.273     |
| Quasi-model 4  | 0.003     | 0.063     | 35.662               | 0.935                | 49.477     |
| Quasi-model 5  | 0.003     | 0.049     | 37.569               | 0.935                | 48.077     |
| Quasi-model 6  | 0.004     | 0.033     | 34.312               | 0.935                | 58.788     |
| Quasi-model 7  | 0.004     | 0.015     | 39.319               | 0.935                | 51.642     |
| Quasi-model 8  | 0.003     | 0.04      | 37.353               | 0.935                | 51.810     |
| Quasi-model 9  | 0.003     | 0.035     | 37.083               | 0.935                | 55.580     |
| Quasi-model 10 | 0.003     | 0.068     | 37.135               | 0.935                | 49.116     |
| Quasi-model 11 | 0.002     | 0.062     | 37.795               | 0.935                | 50.202     |
| Quasi-model 12 | 0.004     | 0.034     | 34.048               | 0.935                | 57.099     |
| Quasi-model 13 | 0.004     | 0.033     | 35.075               | 0.935                | 52.143     |
| Quasi-model 14 | 0.003     | 0.045     | 35.685               | 0.935                | 48.954     |
| Quasi-model 15 | 0.002     | 0.064     | 38.637               | 0.935                | 61.942     |
| Quasi-model 16 | 0.003     | 0.042     | 36.337               | 0.935                | 54.814     |
| Quasi-model 17 | 0.002     | 0.075     | 38.865               | 0.936                | 48.478     |
| Quasi-model 18 | 0.003     | 0.073     | 35.960               | 0.935                | 51.910     |
| Quasi-model 19 | 0.003     | 0.076     | 37.833               | 0.935                | 47.589     |
| Quasi-model 20 | 0.002     | 0.073     | 35.982               | 0.935                | 53.317     |
| Quasi-model 21 | 0.003     | 0.038     | 36.147               | 0.935                | 50.950     |
| Quasi-model 22 | 0.002     | 0.072     | 36.765               | 0.935                | 47.331     |
| Quasi-model 23 | 0.004     | 0.029     | 36.582               | 0.935                | 48.941     |
| Quasi-model 24 | 0.004     | 0.039     | 34.894               | 0.935                | 49.733     |
| Quasi-model 25 | 0.002     | 0.076     | 36.200               | 0.935                | 54.791     |
| Quasi-model 26 | 0.003     | 0.068     | 34.611               | 0.935                | 62.083     |
| Quasi-model 27 | 0.004     | 0.038     | 35.709               | 0.935                | 52.683     |
| Quasi-model 28 | 0.005     | 0.012     | 35.117               | 0.935                | 52.367     |
| Quasi-model 29 | 0.002     | 0.079     | 36.196               | 0.935                | 142.621    |
| Quasi-model 30 | 0.002     | 0.073     | 40.908               | 0.935                | 49.133     |

Model #4: Two compartments, covariate: creatinine clearance

| <b>Model</b>  | <b>KS</b> | <b>KCP</b> | <b>KPC</b> | <b>KI</b> | <b>V<sub>c</sub></b> | <b>R<sup>2</sup></b> | <b>MSE</b> |
|---------------|-----------|------------|------------|-----------|----------------------|----------------------|------------|
| Pop-PK, NPAG  | 0.013     | 5.797      | 2.143      | 0.159     | 9.300                | 0.964                | 44.527     |
| Pop-PK, MAP   |           |            |            |           |                      |                      |            |
| Bayesian      | 0.013     | 5.798      | 2.149      | 0.161     | 9.308                | 0.938                | 46.682     |
| Quasi-model 1 | 0.011     | 4.182      | 2.689      | 0.121     | 14.421               | 0.937                | 63.638     |
| Quasi-model 2 | 0.007     | 3.102      | 3.051      | 0.108     | 17.712               | 0.937                | 64.023     |
| Quasi-model 3 | 0.004     | 2.572      | 3.298      | 0.109     | 19.321               | 0.937                | 61.082     |
| Quasi-model 4 | 0.004     | 2.602      | 3.029      | 0.175     | 21.889               | 0.937                | 53.008     |
| Quasi-model 5 | 0.002     | 2.377      | 2.610      | 0.144     | 16.826               | 0.936                | 93.821     |
| Quasi-model 6 | 0.007     | 4.307      | 2.027      | 0.121     | 13.654               | 0.938                | 49.713     |
| Quasi-model 7 | 0.001     | 2.263      | 4.720      | 0.177     | 23.167               | 0.937                | 56.471     |

|                |       |       |       |       |        |       |         |
|----------------|-------|-------|-------|-------|--------|-------|---------|
| Quasi-model 8  | 0.002 | 3.547 | 3.215 | 0.207 | 17.224 | 0.937 | 90.736  |
| Quasi-model 9  | 0.006 | 1.760 | 1.972 | 0.116 | 18.276 | 0.937 | 46.923  |
| Quasi-model 10 | 0.007 | 3.925 | 2.639 | 0.186 | 12.776 | 0.938 | 52.709  |
| Quasi-model 11 | 0.002 | 2.796 | 5.991 | 0.141 | 23.065 | 0.936 | 147.315 |
| Quasi-model 12 | 0.009 | 4.340 | 3.295 | 0.092 | 15.014 | 0.937 | 86.037  |
| Quasi-model 13 | 0.009 | 4.175 | 1.863 | 0.097 | 11.058 | 0.937 | 46.938  |
| Quasi-model 14 | 0.005 | 5.270 | 3.745 | 0.127 | 18.475 | 0.937 | 80.216  |
| Quasi-model 15 | 0.001 | 4.725 | 5.154 | 0.225 | 20.061 | 0.937 | 48.920  |
| Quasi-model 16 | 0.007 | 4.221 | 3.995 | 0.146 | 18.023 | 0.937 | 55.013  |
| Quasi-model 17 | 0.007 | 1.450 | 1.672 | 0.063 | 19.569 | 0.935 | 69.714  |
| Quasi-model 18 | 0.008 | 4.813 | 2.910 | 0.116 | 12.711 | 0.938 | 91.572  |
| Quasi-model 19 | 0.007 | 3.439 | 5.392 | 0.066 | 21.554 | 0.936 | 55.346  |
| Quasi-model 20 | 0.002 | 3.183 | 4.684 | 0.209 | 18.767 | 0.937 | 47.621  |
| Quasi-model 21 | 0.008 | 3.064 | 3.473 | 0.066 | 17.093 | 0.936 | 66.364  |
| Quasi-model 22 | 0.002 | 2.137 | 4.054 | 0.173 | 22.253 | 0.936 | 130.062 |
| Quasi-model 23 | 0.006 | 2.820 | 3.300 | 0.060 | 18.414 | 0.937 | 52.216  |
| Quasi-model 24 | 0.004 | 4.458 | 4.473 | 0.164 | 18.236 | 0.937 | 55.354  |
| Quasi-model 25 | 0.004 | 5.046 | 3.489 | 0.209 | 13.130 | 0.936 | 92.622  |
| Quasi-model 26 | 0.007 | 4.045 | 2.453 | 0.103 | 12.765 | 0.938 | 47.532  |
| Quasi-model 27 | 0.003 | 4.350 | 4.023 | 0.199 | 20.000 | 0.937 | 56.952  |
| Quasi-model 28 | 0.003 | 4.118 | 3.275 | 0.247 | 15.319 | 0.937 | 71.938  |
| Quasi-model 29 | 0.004 | 1.531 | 3.950 | 0.107 | 24.394 | 0.936 | 67.269  |
| Quasi-model 30 | 0.004 | 4.789 | 4.836 | 0.154 | 16.174 | 0.937 | 105.683 |

**Supplementary table S8: Performance of the quasi-models for Subject 7**

*Model #1: One compartment, no covariate*

| <b>Model</b>   | <b>K</b> | <b>V</b> | <b>R<sup>2</sup></b> | <b>MSE</b> |
|----------------|----------|----------|----------------------|------------|
| Pop-PK, NPAG   | 0.370    | 61.750   | 0.972                | 16.136     |
| Pop-PK, MAP    | 0.368    | 61.296   | 0.946                | 16.061     |
| Quasi-model 1  | 0.369    | 61.281   | 0.946                | 16.346     |
| Quasi-model 2  | 0.375    | 60.379   | 0.946                | 16.102     |
| Quasi-model 3  | 0.361    | 63.788   | 0.946                | 16.660     |
| Quasi-model 4  | 0.349    | 65.248   | 0.945                | 17.792     |
| Quasi-model 5  | 0.366    | 63.268   | 0.946                | 16.121     |
| Quasi-model 6  | 0.385    | 60.202   | 0.946                | 16.500     |
| Quasi-model 7  | 0.344    | 65.096   | 0.945                | 16.925     |
| Quasi-model 8  | 0.378    | 61.597   | 0.946                | 17.490     |
| Quasi-model 9  | 0.358    | 63.897   | 0.946                | 16.271     |
| Quasi-model 10 | 0.372    | 60.699   | 0.946                | 16.244     |
| Quasi-model 11 | 0.368    | 61.286   | 0.946                | 16.094     |
| Quasi-model 12 | 0.377    | 61.576   | 0.946                | 16.598     |
| Quasi-model 13 | 0.369    | 62.252   | 0.946                | 16.352     |
| Quasi-model 14 | 0.360    | 61.233   | 0.946                | 16.857     |
| Quasi-model 15 | 0.422    | 55.203   | 0.946                | 15.952     |
| Quasi-model 16 | 0.360    | 63.403   | 0.946                | 16.463     |
| Quasi-model 17 | 0.353    | 61.129   | 0.945                | 19.735     |

|                |       |        |       |        |
|----------------|-------|--------|-------|--------|
| Quasi-model 18 | 0.378 | 59.905 | 0.946 | 16.242 |
| Quasi-model 19 | 0.367 | 60.546 | 0.946 | 16.210 |
| Quasi-model 20 | 0.358 | 62.375 | 0.946 | 16.046 |
| Quasi-model 21 | 0.316 | 68.328 | 0.945 | 17.500 |
| Quasi-model 22 | 0.358 | 63.528 | 0.946 | 17.301 |
| Quasi-model 23 | 0.371 | 58.782 | 0.946 | 21.280 |
| Quasi-model 24 | 0.351 | 64.795 | 0.946 | 17.530 |
| Quasi-model 25 | 0.372 | 60.916 | 0.946 | 16.278 |
| Quasi-model 26 | 0.340 | 65.831 | 0.945 | 18.326 |
| Quasi-model 27 | 0.388 | 57.875 | 0.946 | 16.226 |
| Quasi-model 28 | 0.388 | 64.570 | 0.945 | 17.181 |
| Quasi-model 29 | 0.350 | 63.557 | 0.945 | 16.756 |
| Quasi-model 30 | 0.392 | 57.988 | 0.947 | 17.298 |

*Model #2: Two compartments, no covariate*

| <b>Model</b>   | <b>K</b> | <b>KCP</b> | <b>KPC</b> | <b>V</b> | <b>R<sup>2</sup></b> | <b>MSE</b> |
|----------------|----------|------------|------------|----------|----------------------|------------|
| Pop-PK, NPAG   | 1.212    | 2.7        | 1.263      | 15.05    | 0.986                | 8.299      |
| Pop-PK, MAP    | 1.214    | 2.71       | 1.279      | 15.138   | 0.973                | 8.128      |
| Bayesian       |          |            |            |          |                      |            |
| Quasi-model 1  | 0.871    | 4.626      | 3.002      | 24.667   | 0.957                | 15.684     |
| Quasi-model 2  | 0.701    | 3.568      | 3.016      | 24.837   | 0.959                | 25.198     |
| Quasi-model 3  | 0.786    | 3.126      | 2.222      | 29.534   | 0.962                | 17.267     |
| Quasi-model 4  | 0.813    | 3.775      | 2.491      | 26.299   | 0.959                | 27.863     |
| Quasi-model 5  | 0.907    | 3.708      | 2.549      | 24.884   | 0.962                | 14.395     |
| Quasi-model 6  | 0.696    | 4.667      | 3.113      | 31.205   | 0.957                | 19.676     |
| Quasi-model 7  | 0.813    | 4.524      | 3.559      | 27.552   | 0.958                | 23.303     |
| Quasi-model 8  | 0.865    | 3.956      | 2.668      | 22.398   | 0.961                | 13.438     |
| Quasi-model 9  | 0.801    | 3.483      | 2.858      | 27.630   | 0.958                | 28.607     |
| Quasi-model 10 | 0.957    | 3.532      | 2.239      | 23.593   | 0.962                | 63.851     |
| Quasi-model 11 | 0.658    | 3.510      | 3.680      | 29.670   | 0.438                | 13.018     |
| Quasi-model 12 | 0.971    | 4.344      | 2.601      | 24.135   | 0.963                | 30.846     |
| Quasi-model 13 | 0.694    | 3.404      | 3.665      | 29.088   | 0.958                | 34.910     |
| Quasi-model 14 | 0.722    | 3.350      | 2.950      | 27.800   | 0.722                | 21.295     |
| Quasi-model 15 | 0.891    | 3.143      | 2.456      | 26.086   | 0.963                | 23.371     |
| Quasi-model 16 | 0.871    | 4.635      | 3.001      | 24.671   | 0.957                | 16.927     |
| Quasi-model 17 | 0.788    | 3.566      | 1.995      | 23.205   | 0.96                 | 21.467     |
| Quasi-model 18 | 0.638    | 3.294      | 3.462      | 33.287   | 0.958                | 15.769     |
| Quasi-model 19 | 0.778    | 3.774      | 3.219      | 28.711   | 0.958                | 30.320     |
| Quasi-model 20 | 0.704    | 3.868      | 2.772      | 29.077   | 0.959                | 19.687     |
| Quasi-model 21 | 1.329    | 4.412      | 1.772      | 14.169   | 0.964                | 14.376     |
| Quasi-model 22 | 0.812    | 4.527      | 3.567      | 27.615   | 0.959                | 27.725     |
| Quasi-model 23 | 0.804    | 3.943      | 2.376      | 25.123   | 0.84                 | 16.059     |
| Quasi-model 24 | 0.766    | 3.729      | 2.857      | 29.500   | 0.958                | 32.075     |
| Quasi-model 25 | 0.953    | 3.516      | 2.247      | 23.664   | 0.959                | 26.056     |
| Quasi-model 26 | 0.824    | 3.740      | 2.945      | 28.309   | 0.958                | 22.751     |
| Quasi-model 27 | 0.794    | 4.265      | 2.485      | 25.430   | 0.958                | 26.994     |
| Quasi-model 28 | 0.839    | 3.157      | 2.825      | 28.196   | 0.961                | 14.064     |

|                |       |       |       |        |       |        |
|----------------|-------|-------|-------|--------|-------|--------|
| Quasi-model 29 | 0.79  | 4.117 | 3.230 | 27.730 | 0.955 | 32.327 |
| Quasi-model 30 | 0.753 | 4.558 | 3.802 | 29.217 | 0.959 | 17.839 |

Model #3: One compartment, covariate: creatinine clearance

| Model          | KS    | KI    | V <sub>c</sub> | R <sup>2</sup> | MSE    |
|----------------|-------|-------|----------------|----------------|--------|
| Pop-PK, NPAG   | 0.003 | 0.092 | 61.475         | 0.972          | 16.138 |
| Pop-PK, MAP    |       |       |                |                |        |
| Bayesian       | 0.003 | 0.091 | 61.540         | 0.946          | 16.064 |
| Quasi-model 1  | 0.003 | 0.05  | 60.139         | 0.946          | 16.053 |
| Quasi-model 2  | 0.002 | 0.079 | 63.332         | 0.946          | 16.172 |
| Quasi-model 3  | 0.002 | 0.098 | 63.754         | 0.946          | 16.346 |
| Quasi-model 4  | 0.003 | 0.078 | 63.247         | 0.946          | 16.323 |
| Quasi-model 5  | 0.003 | 0.066 | 60.351         | 0.946          | 15.458 |
| Quasi-model 6  | 0.003 | 0.086 | 63.034         | 0.946          | 16.493 |
| Quasi-model 7  | 0.003 | 0.031 | 61.955         | 0.946          | 16.521 |
| Quasi-model 8  | 0.003 | 0.043 | 66.005         | 0.946          | 17.228 |
| Quasi-model 9  | 0.003 | 0.040 | 67.122         | 0.945          | 18.641 |
| Quasi-model 10 | 0.003 | 0.051 | 61.892         | 0.946          | 16.358 |
| Quasi-model 11 | 0.003 | 0.018 | 63.165         | 0.946          | 16.420 |
| Quasi-model 12 | 0.003 | 0.067 | 61.659         | 0.946          | 16.075 |
| Quasi-model 13 | 0.003 | 0.051 | 60.631         | 0.946          | 16.295 |
| Quasi-model 14 | 0.003 | 0.066 | 62.961         | 0.946          | 16.474 |
| Quasi-model 15 | 0.003 | 0.081 | 64.431         | 0.946          | 20.421 |
| Quasi-model 16 | 0.003 | 0.046 | 58.505         | 0.946          | 17.873 |
| Quasi-model 17 | 0.003 | 0.024 | 63.926         | 0.946          | 16.206 |
| Quasi-model 18 | 0.003 | 0.018 | 63.229         | 0.946          | 18.498 |
| Quasi-model 19 | 0.003 | 0.025 | 57.893         | 0.946          | 17.373 |
| Quasi-model 20 | 0.003 | 0.039 | 59.837         | 0.947          | 17.664 |
| Quasi-model 21 | 0.003 | 0.016 | 63.082         | 0.946          | 16.393 |
| Quasi-model 22 | 0.003 | 0.078 | 61.438         | 0.946          | 16.383 |
| Quasi-model 23 | 0.003 | 0.095 | 57.699         | 0.946          | 16.424 |
| Quasi-model 24 | 0.003 | 0.078 | 62.387         | 0.946          | 16.610 |
| Quasi-model 25 | 0.003 | 0.044 | 59.928         | 0.947          | 16.691 |
| Quasi-model 26 | 0.003 | 0.038 | 61.514         | 0.946          | 16.041 |
| Quasi-model 27 | 0.003 | 0.084 | 62.554         | 0.946          | 16.245 |
| Quasi-model 28 | 0.003 | 0.075 | 63.662         | 0.946          | 16.301 |
| Quasi-model 29 | 0.003 | 0.032 | 64.773         | 0.946          | 16.523 |
| Quasi-model 30 | 0.003 | 0.017 | 62.326         | 0.946          | 16.837 |

Model #4: Two compartments, covariate: creatinine clearance

| Model         | KS    | KCP   | KPC   | KI    | V <sub>c</sub> | R <sup>2</sup> | MSE    |
|---------------|-------|-------|-------|-------|----------------|----------------|--------|
| Pop-PK, NPAG  | 0.014 | 3.419 | 1.099 | 0.180 | 10.300         | 0.988          | 7.315  |
| Pop-PK, MAP   |       |       |       |       |                |                |        |
| Bayesian      | 0.014 | 3.391 | 1.118 | 0.181 | 10.252         | 0.976          | 7.363  |
| Quasi-model 1 | 0.009 | 5.397 | 3.345 | 0.010 | 23.179         | 0.963          | 19.228 |
| Quasi-model 2 | 0.110 | 3.859 | 1.586 | 0.025 | 16.575         | 0.966          | 14.710 |

|                |       |       |       |       |        |       |        |
|----------------|-------|-------|-------|-------|--------|-------|--------|
| Quasi-model 3  | 0.009 | 5.346 | 1.990 | 0.161 | 14.615 | 0.967 | 10.873 |
| Quasi-model 4  | 0.008 | 4.567 | 2.507 | 0.243 | 21.391 | 0.961 | 14.206 |
| Quasi-model 5  | 0.007 | 4.138 | 2.006 | 0.332 | 18.953 | 0.966 | 16.106 |
| Quasi-model 6  | 0.010 | 4.779 | 1.861 | 0.139 | 17.647 | 0.964 | 24.715 |
| Quasi-model 7  | 0.005 | 3.285 | 1.948 | 0.312 | 23.582 | 0.967 | 22.098 |
| Quasi-model 8  | 0.009 | 5.056 | 2.094 | 0.044 | 17.747 | 0.962 | 18.951 |
| Quasi-model 9  | 0.007 | 5.784 | 3.289 | 0.084 | 24.905 | 0.966 | 21.761 |
| Quasi-model 10 | 0.009 | 4.605 | 2.201 | 0.253 | 19.819 | 0.961 | 18.809 |
| Quasi-model 11 | 0.007 | 4.933 | 2.479 | 0.200 | 18.612 | 0.959 | 15.101 |
| Quasi-model 12 | 0.007 | 4.135 | 1.848 | 0.199 | 19.724 | 0.985 | 25.489 |
| Quasi-model 13 | 0.008 | 4.039 | 2.278 | 0.153 | 20.016 | 0.983 | 16.313 |
| Quasi-model 14 | 0.010 | 4.891 | 2.266 | 0.148 | 21.323 | 0.959 | 14.537 |
| Quasi-model 15 | 0.005 | 5.101 | 2.727 | 0.199 | 20.440 | 0.957 | 34.369 |
| Quasi-model 16 | 0.009 | 4.936 | 2.020 | 0.121 | 15.208 | 0.966 | 57.147 |
| Quasi-model 17 | 0.014 | 5.006 | 1.626 | 0.034 | 12.503 | 0.963 | 12.290 |
| Quasi-model 18 | 0.008 | 3.450 | 1.325 | 0.120 | 19.935 | 0.970 | 43.492 |
| Quasi-model 19 | 0.008 | 4.649 | 2.765 | 0.248 | 16.700 | 0.957 | 39.407 |
| Quasi-model 20 | 0.006 | 4.676 | 3.547 | 0.169 | 24.590 | 0.960 | 15.092 |
| Quasi-model 21 | 0.008 | 4.470 | 2.780 | 0.146 | 21.595 | 0.956 | 13.626 |
| Quasi-model 22 | 0.008 | 4.695 | 1.958 | 0.162 | 20.499 | 0.963 | 13.866 |
| Quasi-model 23 | 0.006 | 4.639 | 3.172 | 0.220 | 22.645 | 0.957 | 17.566 |
| Quasi-model 24 | 0.012 | 3.565 | 1.228 | 0.147 | 11.201 | 0.974 | 8.677  |
| Quasi-model 25 | 0.007 | 5.746 | 5.257 | 0.053 | 24.586 | 0.954 | 98.285 |
| Quasi-model 26 | 0.011 | 4.268 | 1.366 | 0.185 | 13.171 | 0.973 | 9.163  |
| Quasi-model 27 | 0.008 | 4.169 | 1.975 | 0.142 | 20.067 | 0.967 | 20.792 |
| Quasi-model 28 | 0.007 | 5.545 | 3.026 | 0.220 | 22.227 | 0.957 | 17.053 |
| Quasi-model 29 | 0.009 | 2.624 | 1.392 | 0.035 | 19.045 | 0.969 | 10.19  |
| Quasi-model 30 | 0.010 | 5.254 | 2.007 | 0.265 | 16.607 | 0.959 | 26.476 |

**Supplementary table S9: Performance of the quasi-models for Subject 8**

*Model #1: One compartment, no covariate*

| <b>Model</b>   | <b>K</b> | <b>V</b> | <b>R<sup>2</sup></b> | <b>MSE</b> |
|----------------|----------|----------|----------------------|------------|
| Pop-PK, NPAG   | 0.279    | 49.15    | 0.968                | 23.591     |
| Pop-PK, MAP    | 0.281    | 49.737   | 0.939                | 23.026     |
| Quasi-model 1  | 0.274    | 48.002   | 0.939                | 36.485     |
| Quasi-model 2  | 0.289    | 47.524   | 0.939                | 23.979     |
| Quasi-model 3  | 0.255    | 53.331   | 0.938                | 24.342     |
| Quasi-model 4  | 0.306    | 45.752   | 0.940                | 23.322     |
| Quasi-model 5  | 0.292    | 47.310   | 0.939                | 23.093     |
| Quasi-model 6  | 0.245    | 59.564   | 0.939                | 31.349     |
| Quasi-model 7  | 0.282    | 46.373   | 0.940                | 50.850     |
| Quasi-model 8  | 0.302    | 46.050   | 0.940                | 24.441     |
| Quasi-model 9  | 0.252    | 53.850   | 0.936                | 28.967     |
| Quasi-model 10 | 0.249    | 53.539   | 0.936                | 29.828     |
| Quasi-model 11 | 0.273    | 52.046   | 0.938                | 23.426     |



|                |       |        |       |        |
|----------------|-------|--------|-------|--------|
| Quasi-model 12 | 0.282 | 48.778 | 0.939 | 23.626 |
| Quasi-model 13 | 0.252 | 54.734 | 0.936 | 28.012 |
| Quasi-model 14 | 0.275 | 49.734 | 0.938 | 25.445 |
| Quasi-model 15 | 0.271 | 50.546 | 0.938 | 23.464 |
| Quasi-model 16 | 0.299 | 46.925 | 0.94  | 23.125 |
| Quasi-model 17 | 0.297 | 45.614 | 0.94  | 23.935 |
| Quasi-model 18 | 0.278 | 49.638 | 0.939 | 23.260 |
| Quasi-model 19 | 0.282 | 51.913 | 0.939 | 24.283 |
| Quasi-model 20 | 0.264 | 52.006 | 0.937 | 26.156 |
| Quasi-model 21 | 0.284 | 48.912 | 0.939 | 22.919 |
| Quasi-model 22 | 0.274 | 51.250 | 0.938 | 23.909 |
| Quasi-model 23 | 0.259 | 52.961 | 0.937 | 25.278 |
| Quasi-model 24 | 0.270 | 47.516 | 0.938 | 51.556 |
| Quasi-model 25 | 0.277 | 49.354 | 0.938 | 25.197 |
| Quasi-model 26 | 0.261 | 51.702 | 0.937 | 25.035 |
| Quasi-model 27 | 0.287 | 48.064 | 0.939 | 24.030 |
| Quasi-model 28 | 0.267 | 52.032 | 0.939 | 23.261 |
| Quasi-model 29 | 0.254 | 54.208 | 0.938 | 24.289 |
| Quasi-model 30 | 0.291 | 47.721 | 0.940 | 23.055 |

Model #2: Two compartments, no covariate

| <b>Model</b>   | <b>K</b> | <b>KCP</b> | <b>KPC</b> | <b>V</b> | <b>R<sup>2</sup></b> | <b>MSE</b> |
|----------------|----------|------------|------------|----------|----------------------|------------|
| Pop-PK, NPAG   | 1.644    | 1.906      | 1.065      | 5.75     | 0.994                | 4.138      |
| Pop-PK, MAP    | 1.646    | 2.466      | 0.546      | 5.648    | 0.99                 | 3.877      |
| Bayesian       |          |            |            |          |                      |            |
| Quasi-model 1  | 0.667    | 3.817      | 1.579      | 19.524   | 0.954                | 78.711     |
| Quasi-model 2  | 0.960    | 4.135      | 1.282      | 12.431   | 0.954                | 56.993     |
| Quasi-model 3  | 0.682    | 3.171      | 1.629      | 17.746   | 0.961                | 34.189     |
| Quasi-model 4  | 0.662    | 4.542      | 1.749      | 18.348   | 0.957                | 44.053     |
| Quasi-model 5  | 0.634    | 2.161      | 1.332      | 18.559   | 0.965                | 33.378     |
| Quasi-model 6  | 0.673    | 3.598      | 2.128      | 23.817   | 0.952                | 82.834     |
| Quasi-model 7  | 0.830    | 3.058      | 1.995      | 13.991   | 0.959                | 32.429     |
| Quasi-model 8  | 0.450    | 4.192      | 2.897      | 30.497   | 0.952                | 39.076     |
| Quasi-model 9  | 0.466    | 4.875      | 4.555      | 30.118   | 0.947                | 68.414     |
| Quasi-model 10 | 0.798    | 4.470      | 2.142      | 16.781   | 0.956                | 53.407     |
| Quasi-model 11 | 0.814    | 4.255      | 1.896      | 14.647   | 0.952                | 32.713     |
| Quasi-model 12 | 0.581    | 4.251      | 2.022      | 23.983   | 0.951                | 63.422     |
| Quasi-model 13 | 0.588    | 4.106      | 2.417      | 22.673   | 0.941                | 94.283     |
| Quasi-model 14 | 0.668    | 4.279      | 2.546      | 21.652   | 0.941                | 105.975    |
| Quasi-model 15 | 0.578    | 4.371      | 2.863      | 25.943   | 0.941                | 142.364    |
| Quasi-model 16 | 0.670    | 3.692      | 1.568      | 19.455   | 0.959                | 95.754     |
| Quasi-model 17 | 0.735    | 4.145      | 1.289      | 20.222   | 0.953                | 65.380     |
| Quasi-model 18 | 0.680    | 3.184      | 1.639      | 17.671   | 0.951                | 34.981     |
| Quasi-model 19 | 0.661    | 4.396      | 1.750      | 18.345   | 0.957                | 58.888     |
| Quasi-model 20 | 0.544    | 2.903      | 2.423      | 26.090   | 0.946                | 53.361     |
| Quasi-model 21 | 0.473    | 3.947      | 3.624      | 28.903   | 0.942                | 91.278     |
| Quasi-model 22 | 0.827    | 3.574      | 1.763      | 14.090   | 0.957                | 28.703     |

|                |       |       |       |        |       |        |
|----------------|-------|-------|-------|--------|-------|--------|
| Quasi-model 23 | 0.448 | 4.199 | 4.253 | 30.150 | 0.948 | 44.587 |
| Quasi-model 24 | 0.518 | 4.789 | 4.329 | 23.945 | 0.946 | 54.089 |
| Quasi-model 25 | 0.605 | 4.493 | 3.136 | 22.655 | 0.951 | 41.854 |
| Quasi-model 26 | 0.482 | 3.745 | 3.436 | 28.213 | 0.955 | 50.368 |
| Quasi-model 27 | 0.657 | 4.790 | 2.265 | 19.975 | 0.942 | 61.208 |
| Quasi-model 28 | 0.592 | 4.435 | 2.997 | 22.677 | 0.953 | 38.801 |
| Quasi-model 29 | 0.569 | 4.012 | 3.631 | 23.276 | 0.946 | 33.948 |
| Quasi-model 30 | 0.467 | 4.144 | 4.306 | 30.144 | 0.942 | 49.258 |

Model #3: One compartment, covariate: creatinine clearance

| <b>Model</b>   | <b>KS</b> | <b>KI</b> | <b>V<sub>c</sub></b> | <b>R<sup>2</sup></b> | <b>MSE</b> |
|----------------|-----------|-----------|----------------------|----------------------|------------|
| Pop-PK, NPAG   | 0.003     | 0.023     | 47.824               | 0.969                | 23.766     |
| Pop-PK, MAP    |           |           |                      |                      |            |
| Bayesian       | 0.004     | 0.096     | 36.560               | 0.946                | 56.184     |
| Quasi-model 1  | 0.003     | 0.051     | 50.347               | 0.938                | 23.675     |
| Quasi-model 2  | 0.003     | 0.029     | 47.086               | 0.939                | 22.991     |
| Quasi-model 3  | 0.003     | 0.081     | 52.840               | 0.938                | 23.528     |
| Quasi-model 4  | 0.003     | 0.037     | 49.473               | 0.939                | 24.631     |
| Quasi-model 5  | 0.003     | 0.033     | 55.297               | 0.937                | 26.292     |
| Quasi-model 6  | 0.002     | 0.096     | 50.015               | 0.939                | 23.023     |
| Quasi-model 7  | 0.003     | 0.011     | 48.808               | 0.939                | 22.997     |
| Quasi-model 8  | 0.003     | 0.053     | 50.539               | 0.938                | 27.035     |
| Quasi-model 9  | 0.003     | 0.035     | 50.548               | 0.938                | 23.467     |
| Quasi-model 10 | 0.003     | 0.079     | 48.320               | 0.939                | 22.909     |
| Quasi-model 11 | 0.003     | 0.026     | 52.617               | 0.938                | 25.563     |
| Quasi-model 12 | 0.003     | 0.072     | 64.592               | 0.94                 | 23.044     |
| Quasi-model 13 | 0.003     | 0.048     | 49.439               | 0.939                | 23.163     |
| Quasi-model 14 | 0.003     | 0.036     | 52.636               | 0.938                | 23.976     |
| Quasi-model 15 | 0.003     | 0.092     | 49.705               | 0.94                 | 24.756     |
| Quasi-model 16 | 0.003     | 0.086     | 47.594               | 0.939                | 23.137     |
| Quasi-model 17 | 0.003     | 0.044     | 51.398               | 0.939                | 23.258     |
| Quasi-model 18 | 0.003     | 0.026     | 48.505               | 0.939                | 23.666     |
| Quasi-model 19 | 0.003     | 0.027     | 52.786               | 0.939                | 23.818     |
| Quasi-model 20 | 0.003     | 0.064     | 51.879               | 0.937                | 26.801     |
| Quasi-model 21 | 0.003     | 0.057     | 51.173               | 0.939                | 23.316     |
| Quasi-model 22 | 0.003     | 0.059     | 48.812               | 0.939                | 23.019     |
| Quasi-model 23 | 0.003     | 0.022     | 49.142               | 0.939                | 22.911     |
| Quasi-model 24 | 0.003     | 0.072     | 53.461               | 0.939                | 23.186     |
| Quasi-model 25 | 0.003     | 0.075     | 45.627               | 0.940                | 23.351     |
| Quasi-model 26 | 0.003     | 0.055     | 50.046               | 0.939                | 26.182     |
| Quasi-model 27 | 0.003     | 0.060     | 48.366               | 0.939                | 22.987     |
| Quasi-model 28 | 0.003     | 0.051     | 47.495               | 0.940                | 23.064     |
| Quasi-model 29 | 0.003     | 0.056     | 48.691               | 0.939                | 25.840     |
| Quasi-model 30 | 0.003     | 0.009     | 51.691               | 0.937                | 25.368     |

Model #4: Two compartments, covariate: creatinine clearance

| <b>Model</b>   | <b>KS</b> | <b>KCP</b> | <b>KPC</b> | <b>KI</b> | <b>V<sub>c</sub></b> | <b>R<sup>2</sup></b> | <b>MSE</b> |
|----------------|-----------|------------|------------|-----------|----------------------|----------------------|------------|
| Pop-PK, NPAG   | 0.015     | 2.375      | 0.577      | 0.079     | 6.300                | 0.994                | 4.431      |
| Pop-PK, MAP    |           |            |            |           |                      |                      |            |
| Bayesian       | 0.014     | 3.391      | 1.118      | 0.181     | 10.251               | 0.967                | 86.877     |
| Quasi-model 1  | 0.012     | 4.489      | 1.365      | 0.221     | 13.073               | 0.953                | 55.227     |
| Quasi-model 2  | 0.008     | 3.86       | 1.594      | 0.104     | 16.573               | 0.953                | 52.373     |
| Quasi-model 3  | 0.008     | 4.344      | 1.778      | 0.238     | 14.625               | 0.958                | 33.516     |
| Quasi-model 4  | 0.007     | 4.571      | 3.425      | 0.069     | 21.918               | 0.953                | 34.163     |
| Quasi-model 5  | 0.008     | 4.681      | 2.036      | 0.171     | 15.542               | 0.946                | 78.297     |
| Quasi-model 6  | 0.005     | 3.621      | 2.187      | 0.199     | 22.434               | 0.95                 | 36.385     |
| Quasi-model 7  | 0.008     | 4.166      | 1.526      | 0.265     | 18.064               | 0.951                | 173.209    |
| Quasi-model 8  | 0.006     | 5.101      | 2.686      | 0.105     | 19.324               | 0.941                | 42.983     |
| Quasi-model 9  | 0.008     | 4.558      | 1.602      | 0.084     | 16.002               | 0.946                | 85.586     |
| Quasi-model 10 | 0.011     | 4.582      | 1.536      | 0.240     | 15.635               | 0.954                | 69.444     |
| Quasi-model 11 | 0.007     | 4.871      | 2.487      | 0.199     | 18.661               | 0.948                | 30.265     |
| Quasi-model 12 | 0.007     | 3.505      | 1.844      | 0.189     | 19.765               | 0.954                | 146.328    |
| Quasi-model 13 | 0.010     | 4.325      | 1.605      | 0.086     | 15.354               | 0.95                 | 102.499    |
| Quasi-model 14 | 0.006     | 4.084      | 2.010      | 0.192     | 19.585               | 0.945                | 57.984     |
| Quasi-model 15 | 0.005     | 4.484      | 2.729      | 0.162     | 20.426               | 0.942                | 73.442     |
| Quasi-model 16 | 0.008     | 2.400      | 1.208      | 0.145     | 17.496               | 0.967                | 27.066     |
| Quasi-model 17 | 0.011     | 4.953      | 1.095      | 0.040     | 14.573               | 0.946                | 39.911     |
| Quasi-model 18 | 0.005     | 4.854      | 2.230      | 0.143     | 21.081               | 0.950                | 56.700     |
| Quasi-model 19 | 0.009     | 4.222      | 1.792      | 0.114     | 16.699               | 0.951                | 60.435     |
| Quasi-model 20 | 0.006     | 4.595      | 1.969      | 0.169     | 18.049               | 0.946                | 79.587     |
| Quasi-model 21 | 0.005     | 3.568      | 1.866      | 0.274     | 19.966               | 0.951                | 60.527     |
| Quasi-model 22 | 0.006     | 4.797      | 2.980      | 0.300     | 20.256               | 0.942                | 39.818     |
| Quasi-model 23 | 0.006     | 5.387      | 3.581      | 0.157     | 22.467               | 0.943                | 34.263     |
| Quasi-model 24 | 0.013     | 3.546      | 1.218      | 0.146     | 11.164               | 0.973                | 49.977     |
| Quasi-model 25 | 0.005     | 4.991      | 4.043      | 0.214     | 22.371               | 0.950                | 24.227     |
| Quasi-model 26 | 0.010     | 3.688      | 1.365      | 0.191     | 12.801               | 0.962                | 69.528     |
| Quasi-model 27 | 0.007     | 4.030      | 2.219      | 0.151     | 18.741               | 0.957                | 45.340     |
| Quasi-model 28 | 0.006     | 4.800      | 1.945      | 0.282     | 17.921               | 0.944                | 36.518     |
| Quasi-model 29 | 0.009     | 5.589      | 1.610      | 0.036     | 18.753               | 0.951                | 93.079     |
| Quasi-model 30 | 0.008     | 2.916      | 0.883      | 0.176     | 14.019               | 0.971                | 61.228     |

**Supplementary table S10: Performance of the quasi-models for Subject 9**

*Model #1: One compartment, no covariate*

| <b>Model</b>  | <b>K</b> | <b>V</b> | <b>R<sup>2</sup></b> | <b>MSE</b> |
|---------------|----------|----------|----------------------|------------|
| Pop-PK, NPAG  | 0.240    | 21.250   | 0.992                | 27.606     |
| Pop-PK, MAP   | 0.240    | 21.050   | 0.984                | 26.543     |
| Quasi-model 1 | 0.250    | 20.239   | 0.984                | 92.895     |
| Quasi-model 2 | 0.262    | 17.743   | 0.985                | 156.758    |
| Quasi-model 3 | 0.226    | 22.622   | 0.984                | 29.618     |
| Quasi-model 4 | 0.236    | 22.273   | 0.984                | 55.678     |
| Quasi-model 5 | 0.245    | 20.063   | 0.984                | 31.392     |
| Quasi-model 6 | 0.234    | 22.083   | 0.984                | 30.370     |

|                |       |        |       |          |
|----------------|-------|--------|-------|----------|
| Quasi-model 7  | 0.239 | 26.885 | 0.985 | 748.721  |
| Quasi-model 8  | 0.226 | 24.622 | 0.984 | 552.465  |
| Quasi-model 9  | 0.247 | 20.536 | 0.984 | 61.980   |
| Quasi-model 10 | 0.240 | 18.952 | 0.984 | 99.625   |
| Quasi-model 11 | 0.230 | 22.501 | 0.984 | 37.301   |
| Quasi-model 12 | 0.235 | 17.749 | 0.984 | 65.405   |
| Quasi-model 13 | 0.255 | 16.665 | 0.985 | 1869.622 |
| Quasi-model 14 | 0.241 | 18.219 | 0.984 | 293.096  |
| Quasi-model 15 | 0.219 | 22.199 | 0.983 | 44.871   |
| Quasi-model 16 | 0.243 | 22.133 | 0.984 | 33.596   |
| Quasi-model 17 | 0.235 | 20.760 | 0.984 | 104.395  |
| Quasi-model 18 | 0.227 | 23.572 | 0.984 | 107.300  |
| Quasi-model 19 | 0.252 | 21.990 | 0.985 | 88.908   |
| Quasi-model 20 | 0.254 | 23.190 | 0.985 | 52.625   |
| Quasi-model 21 | 0.252 | 23.582 | 0.985 | 771.321  |
| Quasi-model 22 | 0.230 | 21.958 | 0.984 | 150.082  |
| Quasi-model 23 | 0.235 | 19.995 | 0.984 | 241.024  |
| Quasi-model 24 | 0.238 | 21.255 | 0.984 | 26.125   |
| Quasi-model 25 | 0.228 | 23.013 | 0.984 | 247.559  |
| Quasi-model 26 | 0.236 | 23.174 | 0.984 | 115.670  |
| Quasi-model 27 | 0.222 | 22.320 | 0.984 | 33.348   |
| Quasi-model 28 | 0.214 | 24.808 | 0.984 | 155.909  |
| Quasi-model 29 | 0.238 | 22.496 | 0.984 | 78.532   |
| Quasi-model 30 | 0.228 | 24.052 | 0.984 | 469.683  |

Model #2: Two compartments, no covariate

| Model          | K     | KCP   | KPC   | V      | R <sup>2</sup> | MSE      |
|----------------|-------|-------|-------|--------|----------------|----------|
| Pop-PK, NPAG   | 0.492 | 1.857 | 1.659 | 9.350  | 0.995          | 16.700   |
| Pop-PK, MAP    | 0.489 | 1.845 | 1.667 | 9.234  | 0.988          | 22.156   |
| Bayesian       |       |       |       |        |                |          |
| Quasi-model 1  | 0.360 | 1.668 | 3.75  | 14.449 | 0.988          | 52.244   |
| Quasi-model 2  | 0.404 | 1.404 | 3.043 | 12.886 | 0.988          | 145.299  |
| Quasi-model 3  | 0.578 | 1.807 | 1.719 | 11.287 | 0.986          | 325.073  |
| Quasi-model 4  | 0.471 | 3.464 | 3.769 | 10.237 | 0.987          | 136.782  |
| Quasi-model 5  | 0.340 | 1.874 | 3.411 | 13.811 | 0.988          | 23.082   |
| Quasi-model 6  | 0.472 | 2.83  | 3.274 | 11.693 | 0.988          | 64.569   |
| Quasi-model 7  | 0.368 | 1.234 | 1.958 | 10.196 | 0.99           | 1322.221 |
| Quasi-model 8  | 0.285 | 0.572 | 2.087 | 19.260 | 0.99           | 102.488  |
| Quasi-model 9  | 0.349 | 1.303 | 2.064 | 13.156 | 0.99           | 248.914  |
| Quasi-model 10 | 0.388 | 2.901 | 4.678 | 11.857 | 0.986          | 186.467  |
| Quasi-model 11 | 0.365 | 1.449 | 2.635 | 14.546 | 0.989          | 18.442   |
| Quasi-model 12 | 0.342 | 1.044 | 4.030 | 16.168 | 0.987          | 23.909   |
| Quasi-model 13 | 0.356 | 2.234 | 3.220 | 13.057 | 0.989          | 56.026   |
| Quasi-model 14 | 0.372 | 2.349 | 3.613 | 10.655 | 0.987          | 45.648   |
| Quasi-model 15 | 0.432 | 2.317 | 2.903 | 11.036 | 0.988          | 30.522   |
| Quasi-model 16 | 0.360 | 1.114 | 2.005 | 13.099 | 0.9900         | 39.862   |
| Quasi-model 17 | 0.406 | 1.409 | 3.035 | 12.855 | 0.989          | 223.929  |

|                |       |       |       |        |       |         |
|----------------|-------|-------|-------|--------|-------|---------|
| Quasi-model 18 | 0.673 | 1.801 | 0.932 | 6.957  | 0.979 | 195.212 |
| Quasi-model 19 | 0.471 | 3.456 | 3.767 | 10.384 | 0.987 | 142.640 |
| Quasi-model 20 | 0.339 | 1.868 | 3.919 | 13.789 | 0.988 | 36.921  |
| Quasi-model 21 | 0.467 | 2.828 | 3.266 | 11.660 | 0.988 | 106.967 |
| Quasi-model 22 | 0.431 | 3.599 | 3.974 | 11.458 | 0.988 | 38.406  |
| Quasi-model 23 | 0.285 | 0.572 | 2.108 | 19.260 | 0.990 | 119.557 |
| Quasi-model 24 | 0.372 | 1.341 | 2.242 | 10.954 | 0.990 | 64.256  |
| Quasi-model 25 | 0.390 | 2.898 | 4.566 | 11.819 | 0.987 | 221.401 |
| Quasi-model 26 | 0.366 | 2.202 | 3.288 | 12.330 | 0.989 | 121.609 |
| Quasi-model 27 | 0.394 | 2.042 | 1.861 | 11.682 | 0.988 | 391.949 |
| Quasi-model 28 | 0.354 | 0.935 | 1.915 | 13.469 | 0.990 | 49.764  |
| Quasi-model 29 | 0.330 | 1.191 | 3.215 | 15.741 | 0.988 | 35.015  |
| Quasi-model 30 | 0.382 | 1.766 | 2.256 | 13.942 | 0.990 | 18.822  |

*Model #3: One compartment, covariate: creatinine clearance*

| <b>Model</b>   | <b>KS</b> | <b>KI</b> | <b>V<sub>c</sub></b> | <b>R<sup>2</sup></b> | <b>MSE</b> |
|----------------|-----------|-----------|----------------------|----------------------|------------|
| Pop-PK, NPAG   | 0.004     | 0.052     | 20.525               | 0.992                | 26.005     |
| Pop-PK, MAP    |           |           |                      |                      |            |
| Bayesian       | 0.004     | 0.096     | 36.503               | 0.977                | 1930.343   |
| Quasi-model 1  | 0.003     | 0.100     | 78.121               | 0.977                | 16163.582  |
| Quasi-model 2  | 0.004     | 0.100     | 77.032               | 0.977                | 15867.909  |
| Quasi-model 3  | 0.005     | 0.099     | 76.452               | 0.977                | 15798.651  |
| Quasi-model 4  | 0.002     | 0.099     | 79.390               | 0.977                | 16320.148  |
| Quasi-model 5  | 0.002     | 0.097     | 79.442               | 0.977                | 16225.541  |
| Quasi-model 6  | 0.002     | 0.100     | 79.479               | 0.977                | 16435.030  |
| Quasi-model 7  | 0.002     | 0.097     | 79.155               | 0.977                | 16232.114  |
| Quasi-model 8  | 0.005     | 0.097     | 79.514               | 0.977                | 16254.626  |
| Quasi-model 9  | 0.004     | 0.100     | 79.357               | 0.977                | 16439.949  |
| Quasi-model 10 | 0.003     | 0.100     | 77.089               | 0.977                | 15813.633  |
| Quasi-model 11 | 0.003     | 0.100     | 72.783               | 0.977                | 14741.318  |
| Quasi-model 12 | 0.003     | 0.097     | 79.571               | 0.977                | 16291.543  |
| Quasi-model 13 | 0.003     | 0.098     | 77.461               | 0.977                | 15908.973  |
| Quasi-model 14 | 0.001     | 0.099     | 73.635               | 0.977                | 15188.758  |
| Quasi-model 15 | 0.004     | 0.099     | 74.543               | 0.977                | 15075.430  |
| Quasi-model 16 | 0.003     | 0.096     | 78.022               | 0.977                | 15691.112  |
| Quasi-model 17 | 0.004     | 0.095     | 79.382               | 0.976                | 16130.073  |
| Quasi-model 18 | 0.005     | 0.099     | 79.734               | 0.977                | 16462.576  |
| Quasi-model 19 | 0.002     | 0.097     | 79.733               | 0.977                | 16383.775  |
| Quasi-model 20 | 0.005     | 0.099     | 74.661               | 0.977                | 15282.424  |
| Quasi-model 21 | 0.003     | 0.097     | 76.989               | 0.977                | 15695.800  |
| Quasi-model 22 | 0.005     | 0.097     | 78.009               | 0.977                | 16008.559  |
| Quasi-model 23 | 0.002     | 0.100     | 79.421               | 0.977                | 16501.559  |
| Quasi-model 24 | 0.003     | 0.094     | 79.653               | 0.977                | 15797.891  |
| Quasi-model 25 | 0.004     | 0.094     | 78.279               | 0.976                | 15874.993  |
| Quasi-model 26 | 0.004     | 0.099     | 74.898               | 0.977                | 15275.141  |
| Quasi-model 27 | 0.005     | 0.095     | 79.405               | 0.976                | 16141.837  |
| Quasi-model 28 | 0.002     | 0.092     | 79.424               | 0.976                | 15865.659  |

|                |       |       |        |       |           |
|----------------|-------|-------|--------|-------|-----------|
| Quasi-model 29 | 0.005 | 0.091 | 79.676 | 0.976 | 15525.113 |
| Quasi-model 30 | 0.001 | 0.099 | 77.762 | 0.977 | 16027.284 |

Model #4: Two compartments, covariate: creatinine clearance

| Model          | KS    | KCP   | KPC   | KI    | V <sub>c</sub> | R <sup>2</sup> | MSE     |
|----------------|-------|-------|-------|-------|----------------|----------------|---------|
| Pop-PK, NPAG   | 0.014 | 3.419 | 1.099 | 0.18  | 10.300         | 0.988          | 7.315   |
| Pop-PK, MAP    |       |       |       |       |                |                |         |
| Bayesian       | 0.014 | 3.391 | 1.118 | 0.181 | 10.252         | 0.976          | 7.363   |
| Quasi-model 1  | 0.013 | 3.157 | 3.189 | 0.201 | 16.414         | 0.989          | 529.846 |
| Quasi-model 2  | 0.013 | 3.182 | 3.262 | 0.193 | 17.159         | 0.989          | 607.965 |
| Quasi-model 3  | 0.012 | 0.458 | 4.627 | 0.264 | 17.574         | 0.987          | 35.319  |
| Quasi-model 4  | 0.012 | 3.077 | 3.089 | 0.198 | 16.868         | 0.989          | 524.862 |
| Quasi-model 5  | 0.012 | 2.919 | 3.024 | 0.182 | 16.356         | 0.989          | 508.390 |
| Quasi-model 6  | 0.013 | 3.112 | 3.120 | 0.191 | 16.108         | 0.989          | 519.691 |
| Quasi-model 7  | 0.013 | 2.888 | 3.021 | 0.182 | 15.417         | 0.989          | 519.748 |
| Quasi-model 8  | 0.014 | 2.980 | 3.250 | 0.191 | 16.680         | 0.989          | 552.896 |
| Quasi-model 9  | 0.014 | 3.142 | 3.086 | 0.188 | 16.514         | 0.989          | 629.830 |
| Quasi-model 10 | 0.012 | 3.185 | 3.049 | 0.198 | 16.276         | 0.989          | 538.061 |
| Quasi-model 11 | 0.001 | 0.826 | 2.628 | 0.280 | 16.033         | 0.989          | 32.942  |
| Quasi-model 12 | 0.009 | 0.706 | 2.694 | 0.298 | 18.400         | 0.988          | 293.612 |
| Quasi-model 13 | 0.022 | 0.947 | 4.729 | 0.289 | 16.667         | 0.986          | 82.486  |
| Quasi-model 14 | 0.006 | 0.545 | 1.738 | 0.304 | 18.070         | 0.989          | 167.200 |
| Quasi-model 15 | 0.007 | 1.029 | 3.482 | 0.294 | 15.798         | 0.989          | 178.237 |
| Quasi-model 16 | 0.015 | 0.887 | 4.643 | 0.277 | 17.035         | 0.986          | 96.474  |
| Quasi-model 17 | 0.006 | 0.572 | 3.511 | 0.254 | 20.238         | 0.986          | 26.113  |
| Quasi-model 18 | 0.011 | 0.360 | 1.052 | 0.284 | 16.531         | 0.989          | 23.742  |
| Quasi-model 19 | 0.021 | 0.693 | 2.532 | 0.291 | 18.019         | 0.988          | 50.920  |
| Quasi-model 20 | 0.009 | 1.041 | 3.646 | 0.312 | 16.488         | 0.988          | 33.384  |
| Quasi-model 21 | 0.007 | 1.463 | 4.085 | 0.310 | 13.917         | 0.986          | 88.063  |
| Quasi-model 22 | 0.015 | 1.260 | 5.075 | 0.291 | 17.021         | 0.986          | 31.053  |
| Quasi-model 23 | 0.014 | 1.018 | 3.413 | 0.304 | 15.571         | 0.987          | 44.687  |
| Quasi-model 24 | 0.013 | 0.222 | 4.129 | 0.253 | 20.159         | 0.987          | 186.474 |
| Quasi-model 25 | 0.007 | 1.265 | 4.339 | 0.293 | 16.523         | 0.986          | 29.710  |
| Quasi-model 26 | 0.008 | 0.550 | 2.730 | 0.284 | 16.723         | 0.989          | 57.429  |
| Quasi-model 27 | 0.013 | 1.202 | 3.542 | 0.314 | 16.159         | 0.987          | 26.736  |
| Quasi-model 28 | 0.010 | 0.832 | 4.231 | 0.290 | 13.840         | 0.986          | 462.577 |
| Quasi-model 29 | 0.016 | 1.940 | 5.403 | 0.313 | 15.823         | 0.985          | 35.517  |
| Quasi-model 30 | 0.012 | 0.476 | 1.749 | 0.319 | 15.729         | 0.989          | 37.328  |

**Supplementary table S11: Performance of the quasi-models for Subject 10**

Model #1: One compartment, no covariate

| Model         | K     | V      | R <sup>2</sup> | MSE    |
|---------------|-------|--------|----------------|--------|
| Pop-PK, NPAG  | 0.266 | 68.95  | 0.985          | 4.579  |
| Pop-PK, MAP   | 0.367 | 61.445 | 0.831          | 28.284 |
| Quasi-model 1 | 0.336 | 60.789 | 0.834          | 26.685 |

|                |          |        |       |        |
|----------------|----------|--------|-------|--------|
| Quasi-model 2  | 0.367    | 57.237 | 0.832 | 28.923 |
| Quasi-model 3  | 0.318000 | 64.675 | 0.834 | 27.269 |
| Quasi-model 4  | 0.294    | 68.053 | 0.834 | 27.010 |
| Quasi-model 5  | 0.298    | 68.454 | 0.833 | 27.770 |
| Quasi-model 6  | 0.354    | 59.167 | 0.833 | 27.689 |
| Quasi-model 7  | 0.293    | 68.609 | 0.833 | 27.783 |
| Quasi-model 8  | 0.298    | 66.901 | 0.834 | 28.364 |
| Quasi-model 9  | 0.318    | 63.089 | 0.833 | 26.429 |
| Quasi-model 10 | 0.349    | 59.702 | 0.833 | 28.762 |
| Quasi-model 11 | 0.332    | 61.26  | 0.834 | 26.617 |
| Quasi-model 12 | 0.309    | 65.944 | 0.834 | 26.142 |
| Quasi-model 13 | 0.356    | 60.359 | 0.833 | 26.864 |
| Quasi-model 14 | 0.332    | 61.948 | 0.834 | 27.499 |
| Quasi-model 15 | 0.367    | 57.874 | 0.832 | 26.897 |
| Quasi-model 16 | 0.322    | 62.970 | 0.834 | 25.978 |
| Quasi-model 17 | 0.319    | 63.644 | 0.834 | 26.057 |
| Quasi-model 18 | 0.294    | 68.011 | 0.834 | 27.089 |
| Quasi-model 19 | 0.326    | 64.117 | 0.834 | 27.527 |
| Quasi-model 20 | 0.318    | 67.011 | 0.832 | 28.593 |
| Quasi-model 21 | 0.321    | 62.971 | 0.834 | 26.025 |
| Quasi-model 22 | 0.334    | 63.292 | 0.834 | 26.704 |
| Quasi-model 23 | 0.293    | 69.726 | 0.833 | 27.56  |
| Quasi-model 24 | 0.308    | 65.294 | 0.834 | 26.543 |
| Quasi-model 25 | 0.309    | 65.437 | 0.834 | 26.879 |
| Quasi-model 26 | 0.321    | 62.620 | 0.834 | 26.018 |
| Quasi-model 27 | 0.334    | 63.852 | 0.834 | 30.776 |
| Quasi-model 28 | 0.336    | 62.327 | 0.834 | 26.696 |
| Quasi-model 29 | 0.319    | 62.919 | 0.834 | 26.313 |
| Quasi-model 30 | 0.303    | 65.486 | 0.834 | 26.604 |

Model #2: Two compartments, no covariate

| <b>Model</b>   | <b>K</b> | <b>KCP</b> | <b>KPC</b> | <b>V</b> | <b>R<sup>2</sup></b> | <b>MSE</b> |
|----------------|----------|------------|------------|----------|----------------------|------------|
| Pop-PK, NPAG   | 0.684    | 3.292      | 2.203      | 24.65    | 0.987                | 4.103      |
| Pop-PK, MAP    | 1.360    | 1.282      | 0.719      | 23.853   | 0.136                | 864.826    |
| Bayesian       |          |            |            |          |                      |            |
| Quasi-model 1  | 0.818    | 4.498      | 4.533      | 33.334   | 0.568                | 525.761    |
| Quasi-model 2  | 1.230    | 2.434      | 3.412      | 29.031   | 0.447                | 879.033    |
| Quasi-model 3  | 1.346    | 2.182      | 3.505      | 27.282   | 0.490                | 802.525    |
| Quasi-model 4  | 1.337    | 2.857      | 2.949      | 30.042   | 0.408                | 929.952    |
| Quasi-model 5  | 1.349    | 3.050      | 3.093      | 29.675   | 0.483                | 842.914    |
| Quasi-model 6  | 0.844    | 4.543      | 4.544      | 34.768   | 0.554                | 455.938    |
| Quasi-model 7  | 1.411    | 2.183      | 2.829      | 29.552   | 0.419                | 936.534    |
| Quasi-model 8  | 1.378    | 1.805      | 3.387      | 29.303   | 0.439                | 881.256    |
| Quasi-model 9  | 1.437    | 2.681      | 2.761      | 27.428   | 0.372                | 1029.35    |
| Quasi-model 10 | 1.389    | 2.405      | 2.777      | 25.669   | 0.369                | 994.131    |
| Quasi-model 11 | 1.360    | 1.822      | 2.986      | 28.435   | 0.474                | 784.102    |
| Quasi-model 12 | 1.234    | 2.053      | 3.429      | 30.236   | 0.446                | 901.496    |

|                |       |       |       |        |       |          |
|----------------|-------|-------|-------|--------|-------|----------|
| Quasi-model 13 | 1.320 | 2.970 | 3.234 | 28.982 | 0.482 | 835.738  |
| Quasi-model 14 | 1.475 | 2.353 | 3.119 | 25.159 | 0.370 | 966.538  |
| Quasi-model 15 | 1.481 | 2.374 | 3.465 | 25.594 | 0.386 | 920.791  |
| Quasi-model 16 | 0.818 | 4.482 | 4.533 | 33.335 | 0.563 | 528.200  |
| Quasi-model 17 | 1.291 | 2.475 | 2.914 | 29.038 | 0.400 | 954.121  |
| Quasi-model 18 | 1.341 | 2.138 | 3.236 | 27.223 | 0.481 | 795.990  |
| Quasi-model 19 | 1.333 | 2.284 | 2.909 | 30.031 | 0.429 | 906.854  |
| Quasi-model 20 | 1.297 | 2.531 | 3.022 | 30.828 | 0.467 | 847.032  |
| Quasi-model 21 | 1.308 | 2.640 | 2.710 | 29.886 | 0.407 | 928.141  |
| Quasi-model 22 | 1.393 | 2.175 | 3.018 | 29.539 | 0.424 | 907.659  |
| Quasi-model 23 | 1.386 | 1.799 | 3.361 | 29.052 | 0.434 | 910.633  |
| Quasi-model 24 | 1.376 | 2.477 | 2.470 | 27.246 | 0.292 | 1107.884 |
| Quasi-model 25 | 1.396 | 3.743 | 2.911 | 28.128 | 0.409 | 944.231  |
| Quasi-model 26 | 1.333 | 2.363 | 3.524 | 30.360 | 0.494 | 873.237  |
| Quasi-model 27 | 1.348 | 3.171 | 3.437 | 29.579 | 0.480 | 882.499  |
| Quasi-model 28 | 1.358 | 2.990 | 2.951 | 27.813 | 0.469 | 855.140  |
| Quasi-model 29 | 1.242 | 1.464 | 3.193 | 27.988 | 0.427 | 882.819  |
| Quasi-model 30 | 1.425 | 2.351 | 3.085 | 28.259 | 0.492 | 827.174  |

*Model #3: One compartment, covariate: creatinine clearance*

| <b>Model</b>   | <b>KS</b> | <b>KI</b> | <b>V<sub>c</sub></b> | <b>R<sup>2</sup></b> | <b>MSE</b> |
|----------------|-----------|-----------|----------------------|----------------------|------------|
| Pop-PK, NPAG   | 0.004     | 0.022     | 72.525               | 0.985                | 5.318      |
| Pop-PK, MAP    |           |           |                      |                      |            |
| Bayesian       | 0.004     | 0.022     | 72.608               | 0.827                | 33.910     |
| Quasi-model 1  | 0.005     | 0.028     | 65.105               | 0.834                | 26.792     |
| Quasi-model 2  | 0.005     | 0.049     | 61.456               | 0.833                | 26.455     |
| Quasi-model 3  | 0.004     | 0.048     | 67.713               | 0.834                | 26.704     |
| Quasi-model 4  | 0.005     | 0.020     | 62.854               | 0.834                | 26.190     |
| Quasi-model 5  | 0.004     | 0.076     | 63.912               | 0.834                | 26.835     |
| Quasi-model 6  | 0.004     | 0.065     | 64.453               | 0.834                | 25.999     |
| Quasi-model 7  | 0.004     | 0.054     | 64.778               | 0.834                | 26.900     |
| Quasi-model 8  | 0.004     | 0.046     | 64.613               | 0.834                | 26.490     |
| Quasi-model 9  | 0.004     | 0.580     | 63.437               | 0.833                | 26.868     |
| Quasi-model 10 | 0.005     | 0.016     | 65.495               | 0.834                | 26.781     |
| Quasi-model 11 | 0.004     | 0.055     | 65.421               | 0.834                | 27.089     |
| Quasi-model 12 | 0.004     | 0.040     | 62.381               | 0.834                | 26.316     |
| Quasi-model 13 | 0.004     | 0.046     | 65.518               | 0.833                | 26.534     |
| Quasi-model 14 | 0.004     | 0.052     | 65.008               | 0.834                | 26.425     |
| Quasi-model 15 | 0.004     | 0.073     | 62.997               | 0.834                | 27.309     |
| Quasi-model 16 | 0.004     | 0.043     | 65.569               | 0.834                | 26.832     |
| Quasi-model 17 | 0.004     | 0.080     | 65.072               | 0.834                | 26.789     |
| Quasi-model 18 | 0.004     | 0.043     | 63.366               | 0.834                | 26.433     |
| Quasi-model 19 | 0.004     | 0.089     | 63.666               | 0.834                | 27.128     |
| Quasi-model 20 | 0.004     | 0.078     | 61.999               | 0.833                | 26.826     |
| Quasi-model 21 | 0.004     | 0.077     | 66.500               | 0.834                | 26.893     |
| Quasi-model 22 | 0.004     | 0.039     | 64.727               | 0.833                | 26.528     |
| Quasi-model 23 | 0.004     | 0.048     | 66.078               | 0.834                | 27.004     |



|                |       |       |        |       |        |
|----------------|-------|-------|--------|-------|--------|
| Quasi-model 24 | 0.004 | 0.042 | 64.934 | 0.833 | 27.409 |
| Quasi-model 25 | 0.004 | 0.066 | 65.472 | 0.834 | 26.195 |
| Quasi-model 26 | 0.004 | 0.057 | 62.382 | 0.834 | 26.178 |
| Quasi-model 27 | 0.005 | 0.019 | 61.785 | 0.834 | 27.284 |
| Quasi-model 28 | 0.004 | 0.039 | 65.083 | 0.833 | 27.236 |
| Quasi-model 29 | 0.004 | 0.069 | 63.231 | 0.834 | 27.150 |
| Quasi-model 30 | 0.004 | 0.042 | 62.769 | 0.834 | 27.056 |

*Model #4: Two compartments, covariate: creatinine clearance*

| <b>Model</b>   | <b>KS</b> | <b>KCP</b> | <b>KPC</b> | <b>KI</b> | <b>V<sub>c</sub></b> | <b>R<sup>2</sup></b> | <b>MSE</b> |
|----------------|-----------|------------|------------|-----------|----------------------|----------------------|------------|
| Pop-PK, NPAG   | 0.009     | 3.709      | 2.027      | 0.212     | 21.300               | 0.987                | 4.110      |
| Pop-PK, MAP    |           |            |            |           |                      |                      |            |
| Bayesian       | 0.009     | 3.736      | 2.046      | 0.214     | 21.337               | 0.513                | 139.395    |
| Quasi-model 1  | 0.021     | 2.535      | 4.806      | 0.197     | 21.674               | 0.415                | 898.005    |
| Quasi-model 2  | 0.020     | 1.927      | 4.889      | 0.251     | 22.297               | 0.457                | 805.901    |
| Quasi-model 3  | 0.020     | 2.195      | 3.627      | 0.215     | 23.853               | 0.469                | 818.374    |
| Quasi-model 4  | 0.023     | 3.582      | 4.945      | 0.068     | 24.107               | 0.469                | 801.018    |
| Quasi-model 5  | 0.023     | 1.819      | 4.654      | 0.242     | 22.653               | 0.425                | 892.293    |
| Quasi-model 6  | 0.023     | 1.651      | 4.322      | 0.205     | 21.620               | 0.393                | 940.515    |
| Quasi-model 7  | 0.021     | 1.975      | 4.369      | 0.231     | 23.975               | 0.465                | 798.546    |
| Quasi-model 8  | 0.022     | 2.226      | 4.272      | 0.255     | 22.442               | 0.453                | 837.403    |
| Quasi-model 9  | 0.023     | 2.392      | 4.422      | 0.178     | 20.746               | 0.410                | 882.119    |
| Quasi-model 10 | 0.023     | 2.297      | 4.527      | 0.219     | 21.905               | 0.433                | 850.569    |
| Quasi-model 11 | 0.021     | 1.216      | 4.372      | 0.135     | 22.506               | 0.467                | 743.067    |
| Quasi-model 12 | 0.022     | 1.666      | 4.299      | 0.247     | 22.430               | 0.433                | 862.366    |
| Quasi-model 13 | 0.023     | 0.850      | 3.794      | 0.221     | 21.070               | 0.359                | 971.746    |
| Quasi-model 14 | 0.023     | 3.233      | 4.811      | 0.283     | 21.865               | 0.390                | 980.739    |
| Quasi-model 15 | 0.021     | 1.450      | 4.592      | 0.191     | 21.724               | 0.428                | 827.373    |
| Quasi-model 16 | 0.020     | 0.804      | 4.135      | 0.216     | 21.986               | 0.421                | 844.144    |
| Quasi-model 17 | 0.022     | 1.517      | 4.171      | 0.235     | 20.869               | 0.396                | 892.871    |
| Quasi-model 18 | 0.023     | 2.438      | 5.500      | 0.230     | 21.753               | 0.471                | 828.392    |
| Quasi-model 19 | 0.022     | 3.208      | 4.101      | 0.184     | 23.119               | 0.443                | 889.972    |
| Quasi-model 20 | 0.023     | 2.628      | 4.830      | 0.201     | 21.977               | 0.424                | 883.104    |
| Quasi-model 21 | 0.021     | 3.430      | 4.793      | 0.208     | 23.227               | 0.457                | 843.163    |
| Quasi-model 22 | 0.021     | 2.918      | 3.960      | 0.180     | 23.475               | 0.416                | 910.886    |
| Quasi-model 23 | 0.021     | 1.406      | 4.012      | 0.161     | 22.332               | 0.440                | 824.754    |
| Quasi-model 24 | 0.023     | 2.513      | 4.270      | 0.230     | 21.915               | 0.371                | 999.343    |
| Quasi-model 25 | 0.022     | 3.272      | 3.886      | 0.284     | 22.014               | 0.437                | 820.329    |
| Quasi-model 26 | 0.023     | 1.811      | 4.151      | 0.236     | 23.377               | 0.428                | 894.251    |
| Quasi-model 27 | 0.023     | 1.284      | 3.976      | 0.201     | 21.936               | 0.409                | 882.167    |
| Quasi-model 28 | 0.022     | 2.341      | 4.587      | 0.239     | 22.039               | 0.450                | 855.283    |
| Quasi-model 29 | 0.021     | 0.823      | 4.001      | 0.112     | 23.394               | 0.411                | 850.15     |
| Quasi-model 30 | 0.021     | 0.871      | 4.629      | 0.114     | 23.019               | 0.454                | 810.809    |

**Supplementary table S12: Performance of the quasi-models for Subject 11**

*Model #1: One compartment, no covariate*

| <b>Model</b>   | <b>K</b> | <b>V</b> | <b>R<sup>2</sup></b> | <b>MSE</b> |
|----------------|----------|----------|----------------------|------------|
| Pop-PK, NPAG   | 0.266    | 22.150   | 0.976                | 101.473    |
| Pop-PK, MAP    | 0.262    | 21.921   | 0.953                | 99.635     |
| Quasi-model 1  | 0.292    | 19.809   | 0.953                | 127.756    |
| Quasi-model 2  | 0.341    | 16.506   | 0.952                | 328.750    |
| Quasi-model 3  | 0.290    | 19.783   | 0.953                | 127.756    |
| Quasi-model 4  | 0.258    | 23.160   | 0.953                | 169.809    |
| Quasi-model 5  | 0.219    | 24.984   | 0.953                | 156.335    |
| Quasi-model 6  | 0.253    | 22.311   | 0.953                | 103.246    |
| Quasi-model 7  | 0.301    | 18.856   | 0.953                | 164.157    |
| Quasi-model 8  | 0.269    | 20.863   | 0.953                | 113.778    |
| Quasi-model 9  | 0.265    | 21.264   | 0.953                | 142.134    |
| Quasi-model 10 | 0.253    | 24.250   | 0.953                | 276.879    |
| Quasi-model 11 | 0.269    | 20.755   | 0.953                | 133.241    |
| Quasi-model 12 | 0.288    | 20.699   | 0.953                | 142.558    |
| Quasi-model 13 | 0.285    | 20.796   | 0.953                | 105.865    |
| Quasi-model 14 | 0.288    | 19.990   | 0.953                | 126.849    |
| Quasi-model 15 | 0.302    | 19.007   | 0.953                | 213.777    |
| Quasi-model 16 | 0.299    | 19.106   | 0.953                | 206.347    |
| Quasi-model 17 | 0.299    | 20.148   | 0.953                | 159.781    |
| Quasi-model 18 | 0.227    | 23.748   | 0.953                | 153.461    |
| Quasi-model 19 | 0.255    | 22.214   | 0.953                | 106.674    |
| Quasi-model 20 | 0.267    | 22.033   | 0.953                | 104.162    |
| Quasi-model 21 | 0.274    | 20.899   | 0.953                | 99.281     |
| Quasi-model 22 | 0.266    | 21.161   | 0.953                | 146.851    |
| Quasi-model 23 | 0.255    | 22.719   | 0.953                | 110.761    |
| Quasi-model 24 | 0.225    | 24.442   | 0.953                | 121.492    |
| Quasi-model 25 | 0.225    | 25.719   | 0.953                | 213.263    |
| Quasi-model 26 | 0.236    | 23.217   | 0.953                | 159.168    |
| Quasi-model 27 | 0.268    | 20.566   | 0.953                | 248.588    |
| Quasi-model 28 | 0.208    | 26.117   | 0.953                | 195.461    |
| Quasi-model 29 | 0.237    | 23.276   | 0.953                | 148.983    |
| Quasi-model 30 | 0.242    | 24.146   | 0.953                | 131.155    |

*Model #2: Two compartments, no covariate*

| <b>Model</b>  | <b>K</b> | <b>KCP</b> | <b>KPC</b> | <b>V</b> | <b>R<sup>2</sup></b> | <b>MSE</b> |
|---------------|----------|------------|------------|----------|----------------------|------------|
| Pop-PK, NPAG  | 0.732    | 4.579      | 2.847      | 7.550    | 0.978                | 92.405     |
| Pop-PK, MAP   | 0.723    | 4.551      | 2.826      | 7.488    | 0.958                | 89.197     |
| Bayesian      |          |            |            |          |                      |            |
| Quasi-model 1 | 0.527    | 2.713      | 3.859      | 10.246   | 0.957                | 96.929     |
| Quasi-model 2 | 0.334    | 0.444      | 1.908      | 17.242   | 0.954                | 103.233    |
| Quasi-model 3 | 0.487    | 2.805      | 4.543      | 10.589   | 0.955                | 235.215    |
| Quasi-model 4 | 0.456    | 3.015      | 4.670      | 13.026   | 0.955                | 155.442    |
| Quasi-model 5 | 0.464    | 3.305      | 3.891      | 13.189   | 0.956                | 610.397    |
| Quasi-model 6 | 0.474    | 2.838      | 3.276      | 11.667   | 0.957                | 168.720    |
| Quasi-model 7 | 0.831    | 4.853      | 2.307      | 6.054    | 0.959                | 124.397    |
| Quasi-model 8 | 0.797    | 4.948      | 2.506      | 7.981    | 0.958                | 889.947    |

|                |       |         |          |        |       |         |
|----------------|-------|---------|----------|--------|-------|---------|
| Quasi-model 9  | 0.448 | 2.171   | 3.607    | 12.719 | 0.956 | 123.976 |
| Quasi-model 10 | 0.505 | 3.081   | 3.829    | 11.330 | 0.956 | 163.962 |
| Quasi-model 11 | 0.361 | 0.996   | 2.244    | 15.008 | 0.955 | 100.766 |
| Quasi-model 12 | 0.347 | 1.060   | 2544.000 | 17.864 | 0.956 | 528.255 |
| Quasi-model 13 | 0.801 | 3.838   | 2.132    | 6.489  | 0.959 | 104.945 |
| Quasi-model 14 | 0.549 | 4.378   | 3.609    | 10.597 | 0.957 | 258.327 |
| Quasi-model 15 | 0.409 | 1.841   | 4.650    | 14.060 | 0.955 | 127.912 |
| Quasi-model 16 | 0.635 | 2.734   | 2.331    | 8.383  | 0.957 | 150.945 |
| Quasi-model 17 | 0.334 | 0.440   | 1.908    | 17.242 | 0.954 | 103.227 |
| Quasi-model 18 | 0.486 | 2.802   | 4.547    | 10.658 | 0.955 | 146.014 |
| Quasi-model 19 | 0.456 | 3.008   | 4.674    | 13.017 | 0.955 | 154.793 |
| Quasi-model 20 | 0.464 | 3.298   | 3.907    | 13.189 | 0.956 | 611.578 |
| Quasi-model 21 | 0.471 | 2.838   | 3.277    | 11.664 | 0.956 | 150.691 |
| Quasi-model 22 | 0.529 | 4.358   | 4.350    | 10.377 | 0.956 | 179.500 |
| Quasi-model 23 | 0.795 | 4.953   | 2.511    | 8.015  | 0.958 | 815.489 |
| Quasi-model 24 | 0.448 | 2.171   | 3.602    | 12.716 | 0.956 | 115.852 |
| Quasi-model 25 | 0.505 | 373.000 | 3.842    | 11.330 | 0.956 | 163.945 |
| Quasi-model 26 | 0.607 | 3.662   | 2.713    | 10.036 | 0.958 | 683.446 |
| Quasi-model 27 | 0.487 | 2.779   | 3.719    | 12.314 | 0.956 | 281.181 |
| Quasi-model 28 | 0.686 | 2.697   | 1.964    | 7.249  | 0.957 | 179.951 |
| Quasi-model 29 | 0.619 | 3.365   | 2.891    | 9.518  | 0.957 | 237.014 |
| Quasi-model 30 | 0.971 | 4.912   | 2.082    | 6.209  | 0.959 | 917.214 |

*Model #3: One compartment, covariate: creatinine clearance*

| <b>Model</b>   | <b>KS</b> | <b>KI</b> | <b>V<sub>c</sub></b> | <b>R<sup>2</sup></b> | <b>MSE</b> |
|----------------|-----------|-----------|----------------------|----------------------|------------|
| Pop-PK, NPAG   | 0.004     | 0.026     | 21.825               | 0.976                | 101.110    |
| Pop-PK, MAP    |           |           |                      |                      |            |
| Bayesian       | 0.003     | 0.027     | 26.123               | 0.953                | 146.414    |
| Quasi-model 1  | 0.004     | 0.013     | 24.500               | 0.953                | 170.588    |
| Quasi-model 2  | 0.004     | 0.066     | 22.198               | 0.953                | 124.029    |
| Quasi-model 3  | 0.004     | 0.028     | 20.592               | 0.953                | 122.371    |
| Quasi-model 4  | 0.003     | 0.095     | 21.022               | 0.953                | 102.489    |
| Quasi-model 5  | 0.004     | 0.063     | 20.301               | 0.953                | 102.558    |
| Quasi-model 6  | 0.004     | 0.031     | 24.312               | 0.953                | 214.268    |
| Quasi-model 7  | 0.005     | 0.019     | 20.998               | 0.953                | 115.970    |
| Quasi-model 8  | 0.005     | 0.008     | 22.186               | 0.953                | 107.427    |
| Quasi-model 9  | 0.004     | 0.044     | 22.531               | 0.953                | 103.386    |
| Quasi-model 10 | 0.003     | 0.100     | 19.528               | 0.953                | 128.274    |
| Quasi-model 11 | 0.003     | 0.066     | 25.328               | 0.953                | 183.048    |
| Quasi-model 12 | 0.003     | 0.084     | 23.259               | 0.953                | 118.236    |
| Quasi-model 13 | 0.004     | 0.058     | 20.936               | 0.953                | 121.303    |
| Quasi-model 14 | 0.004     | 0.039     | 21.455               | 0.953                | 171.447    |
| Quasi-model 15 | 0.004     | 0.024     | 22.180               | 0.953                | 100.296    |
| Quasi-model 16 | 0.003     | 0.075     | 21.687               | 0.953                | 106.323    |
| Quasi-model 17 | 0.003     | 0.072     | 23.252               | 0.953                | 108.526    |
| Quasi-model 18 | 0.004     | 0.049     | 20.302               | 0.953                | 117.863    |
| Quasi-model 19 | 0.003     | 0.071     | 21.048               | 0.953                | 99.798     |

|                |       |       |        |       |         |
|----------------|-------|-------|--------|-------|---------|
| Quasi-model 20 | 0.005 | 0.014 | 22.622 | 0.953 | 151.291 |
| Quasi-model 21 | 0.004 | 0.071 | 19.804 | 0.953 | 124.283 |
| Quasi-model 22 | 0.004 | 0.035 | 23.531 | 0.953 | 116.217 |
| Quasi-model 23 | 0.004 | 0.076 | 19.260 | 0.953 | 142.133 |
| Quasi-model 24 | 0.004 | 0.015 | 22.844 | 0.953 | 116.793 |
| Quasi-model 25 | 0.004 | 0.024 | 21.988 | 0.953 | 100.736 |
| Quasi-model 26 | 0.004 | 0.010 | 21.970 | 0.953 | 108.947 |
| Quasi-model 27 | 0.003 | 0.077 | 21.900 | 0.953 | 119.534 |
| Quasi-model 28 | 0.004 | 0.021 | 22.876 | 0.953 | 108.982 |
| Quasi-model 29 | 0.004 | 0.046 | 21.188 | 0.953 | 99.517  |
| Quasi-model 30 | 0.003 | 0.077 | 20.530 | 0.953 | 161.467 |

Model #4: Two compartments, covariate: creatinine clearance

| <b>Model</b>   | <b>KS</b> | <b>KCP</b> | <b>KPC</b> | <b>KI</b> | <b>V<sub>c</sub></b> | <b>R<sup>2</sup></b> | <b>MSE</b> |
|----------------|-----------|------------|------------|-----------|----------------------|----------------------|------------|
| Pop-PK, NPAG   | 0.004     | 2.085      | 2.375      | 0.264     | 10.500               | 0.978                | 92.342     |
| Pop-PK, MAP    |           |            |            |           |                      |                      |            |
| Bayesian       | 0.004     | 2.089      | 2.361      | 0.264     | 10.510               | 0.957                | 161.934    |
| Quasi-model 1  | 0.004     | 4.928      | 5.426      | 0.301     | 11.511               | 0.955                | 237.251    |
| Quasi-model 2  | 0.003     | 2.793      | 4.378      | 0.251     | 12.629               | 0.955                | 197.933    |
| Quasi-model 3  | 0.005     | 2.058      | 4.461      | 0.120     | 14.446               | 0.956                | 100.612    |
| Quasi-model 4  | 0.002     | 4.060      | 4.818      | 0.344     | 12.883               | 0.955                | 520.767    |
| Quasi-model 5  | 0.004     | 3.744      | 5.307      | 0.137     | 13.476               | 0.956                | 117.756    |
| Quasi-model 6  | 0.008     | 3.149      | 2.381      | 0.173     | 8.334                | 0.958                | 108.690    |
| Quasi-model 7  | 0.004     | 0.525      | 4.412      | 0.046     | 18.994               | 0.954                | 104.869    |
| Quasi-model 8  | 0.003     | 2.268      | 3.442      | 0.227     | 14.085               | 0.955                | 103.936    |
| Quasi-model 9  | 0.008     | 5.137      | 4.453      | 0.105     | 10.106               | 0.955                | 223.256    |
| Quasi-model 10 | 0.004     | 1.322      | 4.558      | 0.113     | 15.932               | 0.955                | 123.264    |
| Quasi-model 11 | 0.006     | 2.055      | 4.036      | 0.051     | 14.150               | 0.956                | 127.437    |
| Quasi-model 12 | 0.007     | 4.374      | 5.189      | 0.060     | 10.126               | 0.956                | 117.745    |
| Quasi-model 13 | 0.005     | 0.795      | 5.335      | 0.007     | 18.366               | 0.954                | 97.326     |
| Quasi-model 14 | 0.006     | 3.957      | 5.348      | 0.155     | 12.243               | 0.956                | 133.900    |
| Quasi-model 15 | 0.003     | 1.661      | 5.781      | 0.136     | 18.660               | 0.55                 | 133.122    |
| Quasi-model 16 | 0.008     | 3.071      | 3.888      | 0.036     | 11.825               | 0.956                | 130.281    |
| Quasi-model 17 | 0.007     | 4.818      | 4.453      | 0.048     | 11.958               | 0.955                | 171.460    |
| Quasi-model 18 | 0.006     | 3.509      | 2.954      | 0.196     | 10.400               | 0.957                | 94.461     |
| Quasi-model 19 | 0.002     | 1.577      | 5.591      | 0.227     | 15.890               | 0.954                | 108.326    |
| Quasi-model 20 | 0.004     | 2.743      | 4.418      | 0.324     | 11.393               | 0.955                | 114.088    |
| Quasi-model 21 | 0.004     | 5.765      | 5.184      | 0.325     | 9.721                | 0.956                | 96.681     |
| Quasi-model 22 | 0.006     | 2.427      | 5.278      | 0.074     | 14.883               | 0.956                | 111.772    |
| Quasi-model 23 | 0.001     | 1.723      | 3.699      | 0.321     | 13.575               | 0.956                | 102.592    |
| Quasi-model 24 | 0.006     | 3.605      | 3.199      | 0.132     | 10.018               | 0.957                | 422.481    |
| Quasi-model 25 | 0.005     | 3.343      | 4.942      | 0.138     | 12.800               | 0.955                | 199.790    |
| Quasi-model 26 | 0.004     | 2.052      | 3.712      | 0.170     | 14.204               | 0.957                | 147.176    |
| Quasi-model 27 | 0.007     | 4.007      | 4.197      | 0.185     | 9.658                | 0.956                | 97.329     |
| Quasi-model 28 | 0.001     | 2.167      | 4.675      | 0.244     | 13.112               | 0.954                | 312.944    |
| Quasi-model 29 | 0.003     | 1.320      | 3.389      | 0.181     | 15.005               | 0.955                | 98.360     |
| Quasi-model 30 | 0.003     | 2.501      | 4.309      | 0.286     | 14.642               | 0.956                | 195.419    |

**Supplementary table S13: Performance of the quasi-models for Subject 12****Model #1: One compartment, no covariate**

| <b>Model</b>   | <b>K</b> | <b>V</b> | <b>R<sup>2</sup></b> | <b>MSE</b> |
|----------------|----------|----------|----------------------|------------|
| Pop-PK, NPAG   | 0.649    | 34.750   | 0.991                | 10.729     |
| Pop-PK, MAP    | 0.648    | 34.565   | 0.982                | 10.744     |
| Quasi-model 1  | 0.598    | 37.946   | 0.980                | 13.619     |
| Quasi-model 2  | 0.622    | 34.816   | 0.981                | 11.621     |
| Quasi-model 3  | 0.632    | 36.479   | 0.981                | 13.548     |
| Quasi-model 4  | 0.657    | 34.588   | 0.983                | 10.873     |
| Quasi-model 5  | 0.602    | 39.011   | 0.981                | 17.660     |
| Quasi-model 6  | 0.654    | 35.563   | 0.982                | 14.504     |
| Quasi-model 7  | 0.599    | 38.806   | 0.980                | 17.077     |
| Quasi-model 8  | 0.652    | 33.686   | 0.982                | 11.051     |
| Quasi-model 9  | 0.668    | 34.189   | 0.982                | 11.879     |
| Quasi-model 10 | 0.652    | 34.096   | 0.982                | 10.755     |
| Quasi-model 11 | 0.627    | 37.331   | 0.981                | 13.242     |
| Quasi-model 12 | 0.675    | 32.031   | 0.984                | 13.457     |
| Quasi-model 13 | 0.653    | 32.323   | 0.982                | 16.079     |
| Quasi-model 14 | 0.587    | 40.240   | 0.979                | 17.839     |
| Quasi-model 15 | 0.652    | 34.940   | 0.983                | 11.406     |
| Quasi-model 16 | 0.581    | 38.914   | 0.979                | 17.276     |
| Quasi-model 17 | 0.639    | 35.714   | 0.981                | 11.327     |
| Quasi-model 18 | 0.631    | 37.362   | 0.982                | 21.058     |
| Quasi-model 19 | 0.633    | 36.307   | 0.981                | 11.496     |
| Quasi-model 20 | 0.648    | 35.428   | 0.983                | 10.846     |
| Quasi-model 21 | 0.641    | 35.073   | 0.982                | 11.048     |
| Quasi-model 22 | 0.603    | 37.123   | 0.980                | 13.544     |
| Quasi-model 23 | 0.599    | 36.916   | 0.980                | 14.809     |
| Quasi-model 24 | 0.645    | 36.012   | 0.982                | 13.768     |
| Quasi-model 25 | 0.644    | 34.716   | 0.982                | 10.852     |
| Quasi-model 26 | 0.587    | 39.618   | 0.980                | 14.791     |
| Quasi-model 27 | 0.637    | 36.732   | 0.981                | 12.821     |
| Quasi-model 28 | 0.604    | 37.401   | 0.981                | 12.017     |
| Quasi-model 29 | 0.633    | 37.365   | 0.982                | 17.743     |
| Quasi-model 30 | 0.613    | 36.678   | 0.980                | 13.557     |

**Model #2: Two compartments, no covariate**

| <b>Model</b>  | <b>K</b> | <b>KCP</b> | <b>KPC</b> | <b>V</b> | <b>R<sup>2</sup></b> | <b>MSE</b> |
|---------------|----------|------------|------------|----------|----------------------|------------|
| Pop-PK, NPAG  | 1.276    | 1.065      | 1.164      | 14.150   | 0.996                | 5.119      |
| Pop-PK, MAP   | 1.280    | 1.075      | 1.150      | 14.170   | 0.992                | 5.127      |
| Bayesian      |          |            |            |          |                      |            |
| Quasi-model 1 | 0.922    | 1.480      | 2.899      | 25.251   | 0.984                | 28.250     |
| Quasi-model 2 | 1.088    | 1.465      | 1.579      | 19.831   | 0.985                | 37.796     |
| Quasi-model 3 | 0.960    | 1.006      | 1.540      | 23.310   | 0.988                | 29.109     |

|                |       |       |       |        |       |        |
|----------------|-------|-------|-------|--------|-------|--------|
| Quasi-model 4  | 1.185 | 1.734 | 2.353 | 19.390 | 0.991 | 14.472 |
| Quasi-model 5  | 0.860 | 1.553 | 2.060 | 29.240 | 0.985 | 30.400 |
| Quasi-model 6  | 1.083 | 2.836 | 2.841 | 18.286 | 0.983 | 28.561 |
| Quasi-model 7  | 0.837 | 0.509 | 1.206 | 25.907 | 0.990 | 20.565 |
| Quasi-model 8  | 1.475 | 2.276 | 1.777 | 13.534 | 0.985 | 21.145 |
| Quasi-model 9  | 1.254 | 2.915 | 2.762 | 20.810 | 0.985 | 21.821 |
| Quasi-model 10 | 1.207 | 1.968 | 1.725 | 17.360 | 0.992 | 16.738 |
| Quasi-model 11 | 0.997 | 0.839 | 0.794 | 16.882 | 0.992 | 6.882  |
| Quasi-model 12 | 0.997 | 1.838 | 2.302 | 23.721 | 0.986 | 32.366 |
| Quasi-model 13 | 1.086 | 1.515 | 2.628 | 21.830 | 0.985 | 43.573 |
| Quasi-model 14 | 0.926 | 0.967 | 1.073 | 20.652 | 0.992 | 22.490 |
| Quasi-model 15 | 1.254 | 0.981 | 1.277 | 14.257 | 0.992 | 7.032  |
| Quasi-model 16 | 1.442 | 1.482 | 3.085 | 21.006 | 0.985 | 17.549 |
| Quasi-model 17 | 1.086 | 1.472 | 1.589 | 19.881 | 0.986 | 57.780 |
| Quasi-model 18 | 0.922 | 2.447 | 4.012 | 23.225 | 0.982 | 25.618 |
| Quasi-model 19 | 1.183 | 1.728 | 2.370 | 19.379 | 0.991 | 16.029 |
| Quasi-model 20 | 0.788 | 0.998 | 2.055 | 29.463 | 0.985 | 26.904 |
| Quasi-model 21 | 1.078 | 2.843 | 3.069 | 20.066 | 0.982 | 29.050 |
| Quasi-model 22 | 0.837 | 0.502 | 1.219 | 25.917 | 0.989 | 22.148 |
| Quasi-model 23 | 1.475 | 2.276 | 1.770 | 13.556 | 0.985 | 28.514 |
| Quasi-model 24 | 1.130 | 2.187 | 2.720 | 18.367 | 0.986 | 15.305 |
| Quasi-model 25 | 1.207 | 1.816 | 1.715 | 1.207  | 0.992 | 18.943 |
| Quasi-model 26 | 1.146 | 2.300 | 2.913 | 17.087 | 0.984 | 13.165 |
| Quasi-model 27 | 0.910 | 1.012 | 2.330 | 22.130 | 0.985 | 13.181 |
| Quasi-model 28 | 1.112 | 2.439 | 3.563 | 22.838 | 0.987 | 34.958 |
| Quasi-model 29 | 1.163 | 2.996 | 2.543 | 17.569 | 0.983 | 21.672 |
| Quasi-model 30 | 1.360 | 2.369 | 2.036 | 16.591 | 0.990 | 13.906 |

*Model #3: One compartment, covariate: creatinine clearance*

| <b>Model</b>   | <b>KS</b> | <b>KI</b> | <b>V<sub>c</sub></b> | <b>R<sup>2</sup></b> | <b>MSE</b> |
|----------------|-----------|-----------|----------------------|----------------------|------------|
| Pop-PK, NPAG   | 0.004     | 0.095     | 36.775               | 0.990                | 12.167     |
| Pop-PK, MAP    |           |           |                      |                      |            |
| Bayesian       | 0.004     | 0.096     | 36.623               | 0.981                | 12.193     |
| Quasi-model 1  | 0.004     | 0.061     | 36.875               | 0.980                | 12.984     |
| Quasi-model 2  | 0.004     | 0.072     | 38.016               | 0.980                | 13.424     |
| Quasi-model 3  | 0.004     | 0.047     | 35.408               | 0.982                | 11.319     |
| Quasi-model 4  | 0.004     | 0.035     | 35.817               | 0.983                | 11.974     |
| Quasi-model 5  | 0.004     | 0.029     | 39.303               | 0.981                | 13.007     |
| Quasi-model 6  | 0.004     | 0.045     | 37.772               | 0.981                | 12.051     |
| Quasi-model 7  | 0.004     | 0.060     | 34.553               | 0.982                | 11.502     |
| Quasi-model 8  | 0.004     | 0.085     | 35.762               | 0.981                | 12.646     |
| Quasi-model 9  | 0.004     | 0.083     | 36.332               | 0.981                | 11.991     |
| Quasi-model 10 | 0.004     | 0.059     | 38.352               | 0.981                | 14.999     |
| Quasi-model 11 | 0.004     | 0.039     | 34.239               | 0.982                | 13.480     |
| Quasi-model 12 | 0.004     | 0.018     | 39.121               | 0.979                | 16.365     |
| Quasi-model 13 | 0.004     | 0.051     | 36.548               | 0.982                | 11.400     |
| Quasi-model 14 | 0.004     | 0.060     | 38.717               | 0.980                | 17.248     |

|                |       |       |        |       |        |
|----------------|-------|-------|--------|-------|--------|
| Quasi-model 15 | 0.004 | 0.048 | 36.366 | 0.980 | 13.665 |
| Quasi-model 16 | 0.004 | 0.023 | 36.200 | 0.980 | 13.499 |
| Quasi-model 17 | 0.004 | 0.060 | 38.022 | 0.981 | 11.917 |
| Quasi-model 18 | 0.004 | 0.073 | 35.671 | 0.982 | 11.232 |
| Quasi-model 19 | 0.004 | 0.055 | 34.501 | 0.982 | 11.242 |
| Quasi-model 20 | 0.004 | 0.050 | 36.135 | 0.981 | 11.743 |
| Quasi-model 21 | 0.004 | 0.041 | 37.695 | 0.981 | 12.304 |
| Quasi-model 22 | 0.004 | 0.053 | 35.672 | 0.982 | 11.336 |
| Quasi-model 23 | 0.005 | 0.011 | 36.488 | 0.981 | 14.846 |
| Quasi-model 24 | 0.004 | 0.016 | 38.272 | 0.981 | 12.133 |
| Quasi-model 25 | 0.004 | 0.081 | 33.770 | 0.983 | 10.732 |
| Quasi-model 26 | 0.004 | 0.095 | 37.058 | 0.981 | 11.595 |
| Quasi-model 27 | 0.004 | 0.033 | 37.743 | 0.981 | 16.902 |
| Quasi-model 28 | 0.004 | 0.076 | 39.605 | 0.980 | 16.634 |
| Quasi-model 29 | 0.004 | 0.036 | 36.738 | 0.981 | 12.287 |
| Quasi-model 30 | 0.004 | 0.042 | 36.378 | 0.981 | 12.499 |

*Model #4: Two compartments, covariate: creatinine clearance*

| <b>Model</b>   | <b>KS</b> | <b>KCP</b> | <b>KPC</b> | <b>KI</b> | <b>V<sub>c</sub></b> | <b>R<sup>2</sup></b> | <b>MSE</b> |
|----------------|-----------|------------|------------|-----------|----------------------|----------------------|------------|
| Pop-PK, NPAG   | 0.008     | 0.983      | 1.099      | 0.128     | 15.100               | 0.996                | 4.900      |
| Pop-PK, MAP    |           |            |            |           |                      |                      |            |
| Bayesian       | 0.008     | 0.959      | 1.118      | 0.128     | 15.062               | 0.992                | 4.905      |
| Quasi-model 1  | 0.005     | 1.528      | 2.096      | 0.286     | 21.534               | 0.986                | 57.322     |
| Quasi-model 2  | 0.007     | 1.623      | 2.471      | 0.089     | 17.712               | 0.986                | 12.424     |
| Quasi-model 3  | 0.008     | 2.314      | 3.072      | 0.145     | 18.693               | 0.988                | 19.290     |
| Quasi-model 4  | 0.007     | 0.514      | 0.858      | 0.030     | 19.653               | 0.993                | 5.302      |
| Quasi-model 5  | 0.008     | 1.824      | 1.438      | 0.264     | 13.673               | 0.990                | 11.158     |
| Quasi-model 6  | 0.006     | 2.376      | 3.074      | 0.303     | 20.720               | 0.984                | 19.492     |
| Quasi-model 7  | 0.009     | 2.852      | 2.827      | 0.018     | 17.697               | 0.985                | 24.487     |
| Quasi-model 8  | 0.007     | 0.782      | 1.120      | 0.291     | 12.602               | 0.992                | 56.124     |
| Quasi-model 9  | 0.007     | 2.929      | 4.347      | 0.203     | 16.343               | 0.984                | 13.000     |
| Quasi-model 10 | 0.007     | 2.926      | 1.672      | 0.265     | 17.760               | 0.988                | 25.874     |
| Quasi-model 11 | 0.009     | 1.792      | 1.466      | 0.291     | 10.942               | 0.990                | 10.156     |
| Quasi-model 12 | 0.008     | 3.702      | 3.598      | 0.166     | 16.816               | 0.984                | 45.995     |
| Quasi-model 13 | 0.005     | 0.998      | 1.961      | 0.217     | 22.645               | 0.987                | 24.551     |
| Quasi-model 14 | 0.008     | 4.128      | 3.215      | 0.123     | 14.196               | 0.984                | 14.264     |
| Quasi-model 15 | 0.008     | 3.993      | 3.766      | 0.098     | 18.565               | 0.986                | 18.156     |
| Quasi-model 16 | 0.008     | 2.389      | 2.608      | 0.156     | 18.938               | 0.989                | 9.869      |
| Quasi-model 17 | 0.007     | 1.005      | 1.120      | 0.044     | 19.570               | 0.991                | 29.703     |
| Quasi-model 18 | 0.006     | 1.877      | 2.765      | 0.232     | 21.686               | 0.986                | 25.206     |
| Quasi-model 19 | 0.009     | 3.414      | 2.687      | 0.209     | 15.029               | 0.986                | 43.277     |
| Quasi-model 20 | 0.005     | 2.627      | 4.169      | 0.300     | 21.240               | 0.982                | 16.273     |
| Quasi-model 21 | 0.007     | 2.353      | 2.790      | 0.122     | 17.154               | 0.985                | 14.533     |
| Quasi-model 22 | 0.009     | 3.500      | 3.107      | 0.191     | 14.462               | 0.985                | 33.624     |
| Quasi-model 23 | 0.010     | 2.293      | 1.673      | 0.169     | 12.638               | 0.987                | 29.671     |
| Quasi-model 24 | 0.007     | 2.508      | 2.412      | 0.220     | 20.311               | 0.987                | 30.340     |
| Quasi-model 25 | 0.008     | 1.788      | 2.231      | 0.004     | 18.217               | 0.985                | 13.796     |

|                |       |       |       |       |        |       |        |
|----------------|-------|-------|-------|-------|--------|-------|--------|
| Quasi-model 26 | 0.005 | 1.169 | 2.238 | 0.313 | 21.319 | 0.986 | 11.211 |
| Quasi-model 27 | 0.005 | 0.652 | 1.061 | 0.231 | 23.553 | 0.990 | 30.115 |
| Quasi-model 28 | 0.007 | 2.753 | 3.219 | 0.132 | 20.645 | 0.984 | 11.313 |
| Quasi-model 29 | 0.012 | 1.206 | 1.070 | 0.004 | 8.239  | 0.991 | 80.837 |
| Quasi-model 30 | 0.009 | 2.969 | 3.061 | 0.067 | 16.684 | 0.985 | 36.019 |
